# Supplementary material for: Resistance gene–guided genome mining reveals the roseopurpurins as inhibitors of cyclin-dependent kinases
Source: PubMed Central journal article supplement (PMC10691236; doi:10.1073/pnas.2310522120), 2023-11-20
Supplement: pnas.2310522120.sapp.pdf [file pnas.2310522120.sapp.pdf]

## Supporting Information for

### Resistance gene-guided genome mining reveals the roseopurpurins as inhibitors of cyclin-dependent kinases (CDKs)

Kyle L Dunbar<sup>1\*</sup>, Bruno Perlatti<sup>1\*</sup>, Nicholas Liu<sup>1\*</sup>, Daniel Mummau<sup>1</sup>, Yi-Ming Chiang<sup>1</sup>, Amber Cornelius<sup>1</sup>, Lawrence Hon<sup>1</sup>, Monika Nimavat<sup>1</sup>, Jason Pallas<sup>1</sup>, Sina Kordes<sup>2</sup>, Ho Leung Ng<sup>1</sup>, Colin JB Harvey<sup>1\*\*</sup>

<sup>1</sup>Hexagon Bio, Menlo Park, CA, 94025

<sup>2</sup>Proteros Biostructures GmbH Bunsenstr 7a, D-82152, Martinsried, Germany

\*\* Corresponding Author: Colin JB Harvey

Email: [colin@hexagonbio.com](mailto:colin@hexagonbio.com)

#### This PDF file includes:

|                                                                                                                           |          |
|---------------------------------------------------------------------------------------------------------------------------|----------|
| <b>This PDF file includes:</b> .....                                                                                      | <b>1</b> |
| <b>Supplementary Methods</b> .....                                                                                        | <b>4</b> |
| Solutions and buffers for transformation of <i>A. nidulans</i> and <i>A. uvarum</i> .....                                 | 4        |
| Media Used for Roseopurpurin Production in <i>A. uvarum</i> .....                                                         | 4        |
| <b>Supplementary Tables</b> .....                                                                                         | <b>7</b> |
| Table S1: Primers used in this study.....                                                                                 | 7        |
| Table S2: Plasmids used in this study.....                                                                                | 9        |
| Table S3: Engineered strains used in this study.....                                                                      | 10       |
| Table S4: Comparison of homologous clusters in <i>A. uvarum</i> and TTI001159.....                                        | 10       |
| Table S5. IDs of sequences used for phylogenetic trees.....                                                               | 11       |
| Table S6. Data collection and processing statistics for CDK2 structure.....                                               | 12       |
| Table S7. CDK2 structure refinement statistics.....                                                                       | 13       |
| Table S8. NMR Spectroscopic data for <b>1</b> (Roseopurpurin C).....                                                      | 14       |
| Table S9. NMR Spectroscopic data for <b>6</b> (4-O-demethylbarbatic acid).....                                            | 15       |
| Table S10. NMR Spectroscopic data for <b>7</b> (Hypoprotocetraric acid).....                                              | 16       |
| Table S11. NMR Spectroscopic data for <b>8</b> (3,8-dihydroxy-1,4,6,9-tetramethyl-dibenzo [b,e][1,4]dioxepin-11-one)..... | 17       |
| Table S12. NMR Spectroscopic data for <b>10</b> ( Roseopurpurin G).....                                                   | 18       |

|                                                                                                                                      |           |
|--------------------------------------------------------------------------------------------------------------------------------------|-----------|
| Table S13. NMR Spectroscopic data for <b>11</b> (Aculeatusquinone C).....                                                            | 19        |
| Table S14. NMR Spectroscopic data for <b>12</b> (Roseopurpurin D).....                                                               | 20        |
| <b>Supplementary Figures</b> .....                                                                                                   | <b>21</b> |
| Figure S1: Homologous BGCs containing resistance genes with homology to human CDK2 occur across multiple genomes.....                | 21        |
| Figure S2: Production of <b>1</b> and precursors in wild-type and engineered <i>A. uvarum</i> across cultures in multiple media..... | 22        |
| Figure S3: Characterization of the biosynthesis of <b>1</b> by heterologous expression in <i>A. nidulans</i> .....                   | 23        |
| Figure S4. BGC HX1012/HX1035-derived metabolites do not inhibit the ADP-detection assay.....                                         | 24        |
| Figure S5. Commercial depsides and depsidones are not potent inhibitors of CDK2/cyclin E1-dependent Histone H1 phosphorylation.....  | 25        |
| Figure S6. <b>1</b> is an ATP-competitive inhibitor of CDK2 displaying tight-binding inhibition.....                                 | 26        |
| Figure S7. Cell Cycle arrest by serum starvation and cell cycle inhibitors.....                                                      | 27        |
| Figure S8. Structural comparison of <b>1</b> bound to CDK2 and other CDK2 inhibitors.....                                            | 28        |
| Figure S9. Phylogeny of kinases profiled in the selectivity panel.....                                                               | 29        |
| Figure S10. Roseopurpurin C ( <b>1</b> ) kinase selectivity profile.....                                                             | 34        |
| Figure S11. Staurosporine kinase selectivity profile.....                                                                            | 39        |
| Figure S12. Sequence alignment of AMPK $\alpha$ 1 and CAMK4 with select CDKs.....                                                    | 40        |
| Figure S13. Structural alignment of AMPK $\alpha$ 1 and <b>1</b> -bound CDK2.....                                                    | 41        |
| Figure S14. Structural alignment of CAMK4 and <b>1</b> -bound CDK2.....                                                              | 42        |
| Figure S15. The $^1\text{H}$ NMR spectrum of <b>1</b> in $\text{CD}_3\text{OD}$ (600 MHz).....                                       | 43        |
| Figure S16. The $^{13}\text{C}$ NMR spectrum of <b>1</b> in $\text{CD}_3\text{OD}$ (150 MHz).....                                    | 43        |
| Figure S17. The $^1\text{H}$ - $^{13}\text{C}$ HSQC NMR spectrum of <b>1</b> in $\text{CD}_3\text{OD}$ (600 MHz).....                | 44        |
| Figure S18. The $^1\text{H}$ - $^{13}\text{C}$ HMBC NMR spectrum of <b>1</b> in $\text{CD}_3\text{OD}$ (600 MHz).....                | 44        |
| Figure S19. The $^1\text{H}$ - $^1\text{H}$ NOESY NMR spectrum of <b>1</b> in $\text{CD}_3\text{OD}$ (600 MHz).....                  | 45        |
| Figure S20. The $^1\text{H}$ NMR spectrum of <b>6</b> in $\text{CD}_3\text{OD}$ (600 MHz).....                                       | 45        |
| Figure S21. The $^{13}\text{C}$ NMR spectrum of <b>6</b> in $\text{CD}_3\text{OD}$ (150 MHz).....                                    | 46        |
| Figure S22. The $^1\text{H}$ - $^{13}\text{C}$ HSQC NMR spectrum of <b>6</b> in $\text{CD}_3\text{OD}$ (600 MHz).....                | 46        |
| Figure S23. The $^1\text{H}$ - $^{13}\text{C}$ HMBC NMR spectrum of <b>6</b> in $\text{CD}_3\text{OD}$ (600 MHz).....                | 47        |
| Figure S24. The $^1\text{H}$ NMR spectrum of <b>7</b> in $\text{CD}_3\text{OD}$ (600 MHz).....                                       | 47        |
| Figure S25. The $^{13}\text{C}$ NMR spectrum of <b>7</b> in $\text{CD}_3\text{OD}$ (150 MHz).....                                    | 48        |
| Figure S26. The $^1\text{H}$ - $^{13}\text{C}$ HSQC NMR spectrum of <b>7</b> in $\text{CD}_3\text{OD}$ (600 MHz).....                | 48        |
| Figure S27. The $^1\text{H}$ - $^{13}\text{C}$ HMBC NMR spectrum of <b>7</b> in $\text{CD}_3\text{OD}$ (600 MHz).....                | 49        |
| Figure S28. The $^1\text{H}$ NMR spectrum of <b>8</b> in $\text{CD}_3\text{OD}$ (600 MHz).....                                       | 49        |
| Figure S29. The $^{13}\text{C}$ NMR spectrum of <b>8</b> in $\text{CD}_3\text{OD}$ (150 MHz).....                                    | 50        |
| Figure S30. The $^1\text{H}$ - $^{13}\text{C}$ HSQC NMR spectrum of <b>8</b> in $\text{CD}_3\text{OD}$ (600 MHz).....                | 50        |
| Figure S31. The $^1\text{H}$ - $^{13}\text{C}$ HMBC NMR spectrum of <b>8</b> in $\text{CD}_3\text{OD}$ (600 MHz).....                | 51        |
| Figure S32. The $^1\text{H}$ NMR spectrum of <b>10</b> in $\text{CD}_3\text{OD}$ (600 MHz).....                                      | 51        |
| Figure S33. The $^{13}\text{C}$ NMR spectrum of <b>10</b> in $\text{CD}_3\text{OD}$ (150 MHz).....                                   | 52        |
| Figure S34. The $^1\text{H}$ - $^{13}\text{C}$ HSQC NMR spectrum of <b>10</b> in $\text{CD}_3\text{OD}$ (600 MHz).....               | 52        |
| Figure S35. The $^1\text{H}$ - $^{13}\text{C}$ HMBC NMR spectrum of <b>10</b> in $\text{CD}_3\text{OD}$ (600 MHz).....               | 53        |
| Figure S36. The $^1\text{H}$ NMR spectrum of <b>11</b> in $\text{CD}_3\text{OD}$ (600 MHz).....                                      | 53        |
| Figure S37. The $^{13}\text{C}$ NMR spectrum of <b>11</b> in $\text{CD}_3\text{OD}$ (150 MHz).....                                   | 54        |
| Figure S38. The $^1\text{H}$ - $^{13}\text{C}$ HSQC NMR spectrum of <b>11</b> in $\text{CD}_3\text{OD}$ (600 MHz).....               | 54        |
| Figure S39. The $^1\text{H}$ - $^{13}\text{C}$ HMBC NMR spectrum of <b>11</b> in $\text{CD}_3\text{OD}$ (600 MHz).....               | 55        |

|                                                                                                                        |           |
|------------------------------------------------------------------------------------------------------------------------|-----------|
| Figure S40. The $^1\text{H}$ NMR spectrum of <b>12</b> in $\text{CD}_3\text{OD}$ (600 MHz).....                        | 55        |
| Figure S41. The $^{13}\text{C}$ NMR spectrum of <b>12</b> in $\text{CD}_3\text{OD}$ (150 MHz).....                     | 56        |
| Figure S42 The $^1\text{H}$ - $^{13}\text{C}$ HSQC NMR spectrum of <b>12</b> in $\text{CD}_3\text{OD}$ (600 MHz).....  | 56        |
| Figure S43. The $^1\text{H}$ - $^{13}\text{C}$ HMBC NMR spectrum of <b>12</b> in $\text{CD}_3\text{OD}$ (600 MHz)..... | 57        |
| <b>References</b> .....                                                                                                | <b>57</b> |

## Supplementary Methods

### Solutions and buffers for transformation of *A. nidulans* and *A. uvarum*

1. **20X Nitrate Salt Solution:**
  - a. Sodium nitrate (120 g/L)
  - b. Potassium chloride (10.4 g/L)
  - c. Magnesium sulfate heptahydrate (10.4 g/L)
  - d. Potassium phosphate monobasic (30.4 g/L)
2. **Fungal 1000X Trace Elements:**
  - a. EDTA (10 g/L)
  - b. Zinc sulfate heptahydrate (4.4 g/L)
  - c. Manganese chloride (1.01 g/L)
  - d. Cobalt chloride hexahydrate (0.32 g/L)
  - e. Copper sulfate pentahydrate (0.315 g/L)
  - f. Ammonium molybdate pentahydrate (0.22 g/L)
  - g. Calcium chloride dihydrate (1.47 g/L)
  - h. Iron sulfate heptahydrate (1.0 g/L)
3. **YG Medium:**
  - a. Glucose (20 g/L)
  - b. Yeast extract (10 g/L)
  - c. 1000X trace elements (1 mL/L)
4. **Digestion Buffer (50 mL):**
  - a. Magnesium sulfate heptahydrate (14.79 g)
  - b. VinoTaste Pro (6 g)
  - c. Yatalase (75 mg)
  - d. 175 mM sodium phosphate buffer (up to 50 mL)
5. **0.4 M ST Buffer:**
  - a. Sorbitol (72.86 g/L)
  - b. 1 M Tris-HCl, pH 8.0 (20 mL/L)
6. **0.6 M KCl Solution:**
  - a. Potassium chloride (44.7 g/L)
7. **Transformation Buffer: 0.6 M KCl, 50 mM CaCl<sub>2</sub> Solution:**
  - a. Potassium chloride (44.7 g/L)
  - b. Calcium chloride (7.4 g/L)
8. **PEG Solution (40 mL)**
  - a. 24 g PEG 3,350 (60% (w/v))
  - b. 0.29 g CaCl<sub>2</sub> heptahydrate / or 2 mL of 1 M stock solution
  - c. 2 mL Tris-HCl pH 7.5 (2 mL from 1 M stock)
    - i. Use a 50 mL sterile tube. Start with 2 mL Tris, add PEG and CaCl<sub>2</sub> and fill up with RO water (needs very little). Shake to make sure PEG and CaCl<sub>2</sub> is suspended in water. Put in 55°C water bath to dissolve and bring up to 40 mL as needed. Do not place the tube on ice as the PEG and CaCl<sub>2</sub> will crash out of solution.
9. **Sorbitol Minimal Media (SMM):**
  - a. D-Glucose (10 g/L)
  - b. 20X nitrate salts (50 mL/L)
  - c. Sorbitol (218.6 g/L)
  - d. 1000X trace elements (1 mL/L)

### Media Used for Roseopurpurin Production in *A. uvarum*

1. PD



- a. 40 g/L Potato Dextrose Broth
2. MME
  - a. 30g/L Malt Extract
  - b. 3g/L peptone
  - c. 0.01g/L ZnSO<sub>4</sub>·7H<sub>2</sub>O
  - d. 0.005g/L CuSO<sub>4</sub>·5H<sub>2</sub>O
3. CYS80
  - a. 80g/L sucrose
  - b. 50g/L yellow cornmeal
  - c. 1g/L yeast extract
4. WATM
  - a. 2g/L NaNO<sub>3</sub>
  - b. 30g/L saccharose
  - c. 2g/L yeast extract
  - d. 3g/L peptone
  - e. 5g/L corn steep solids
  - f. 1g/L KH<sub>2</sub>PO<sub>4</sub>·H<sub>2</sub>O
  - g. 0.2g/L KCl
  - h. 0.5g/L FeSO<sub>4</sub>·7H<sub>2</sub>O
  - i. 0.01g/L ZnSO<sub>4</sub>·7H<sub>2</sub>O
  - j. 0.005g/L CuSO<sub>4</sub>·5H<sub>2</sub>O
5. Supermalt
  - a. 50g/L Malt Extract
  - b. 10g/L Yeast Extract
  - c. 20 mg/L FeSO<sub>4</sub>·7H<sub>2</sub>O
  - d. 7 mg/L ZnSO<sub>4</sub>·7H<sub>2</sub>O
6. MGTY
  - a. 15 g/L Maltose
  - b. 10 g/L Glycerol
  - c. 10 g/L Tryptone
  - d. 10 g/L Yeast extract
  - e. 1 g/L KH<sub>2</sub>PO<sub>4</sub>
  - f. 0.2 g/L MgSO<sub>4</sub>
  - g. 0.5 g/L CaCl<sub>2</sub>
7. SMK
  - a. 40 g/L Soluble Starch
  - b. 1 g/L Yeast Extract
  - c. 4.3 g/L Murashige & Skoog Salts
8. MMSY
  - a. 40 g/L Mannitol
  - b. 5 g/L Yeast Extract
  - c. 4.3 g/L Murashige & Skoog Salts
  - d.
9. MEY
  - a. 20g/L Malt Extract
  - b. 5g/L Yeast extract
10. GLX
  - a. 10g/L peptone
  - b. 21g/L malt extract

- c. 40g/L glycerol
11. CYA
- a. 3g/L NaNO<sub>3</sub>
  - b. 5g/L yeast extract
  - c. 30g/L sucrose
  - d. 1.3g/L K<sub>2</sub>HPO<sub>4</sub>
  - e. 10ml/L Czapek concentrate (10 mL/L)
12. YPSS
- a. 4g/L yeast extract
  - b. 14g/L soluble starch
  - c. 1g/L K<sub>2</sub>HPO<sub>4</sub>
  - d. 0.5 g/L MgSO<sub>4</sub>•7H<sub>2</sub>O

## Supplementary Tables

**Table S1: Primers used in this study**

| Primer Name  | Primer Sequence                                                                                                                              | Plasmids Used In                         |
|--------------|----------------------------------------------------------------------------------------------------------------------------------------------|------------------------------------------|
| Ba3uU0j0w5bi | CTTTCAACCATACATATTCCCCGTTTC                                                                                                                  | pNL0078                                  |
| 0gCudLDxE4iS | CTCCCTCTTTGCCAGTTCTCC                                                                                                                        | pNL0075<br>pNL0076<br>pNL0077<br>pNL0078 |
| PDELrFSyuB0C | CTTGAACGAGAGGCGTCAGCGAC                                                                                                                      | pNL0075<br>pNL0076<br>pNL0077<br>pNL0078 |
| td7CbYPTeKut | CTGAGCACTTCTCCCTTTTATATTCCACAAAA<br>CATAACACAACTTCACCATGGTGGGCACAA<br>TTGACACACACC                                                           | pNL0078                                  |
| U8q1J1doZSPB | GCACCAAACAGGACAGCTGATCAAGG                                                                                                                   | pNL0075                                  |
| IH1ILXduJIGh | ATGGATGGAGTGAACACTAC                                                                                                                         | pNL0078                                  |
| YGX4kAOVe4Bz | TTTTATAAATTAGCCCTTCATG                                                                                                                       | pNL0078                                  |
| 8m5Hut2DMdSs | GGCAGACTTCTCTGCG                                                                                                                             | pNL0078                                  |
| SNImelv5Avtf | ATCCTATTCTTTCATCGTAC                                                                                                                         | pNL0076<br>pNL0077<br>pNL0078            |
| U8q1J1doZSPB | GCACCAAACAGGACAGCTGATCAAGG                                                                                                                   | pNL0076<br>pNL0077<br>pNL0078            |
| BFck2StgbGZj | CTCACGAAGCTTGACTAACCATTACCCCGCC<br>ACATAGACACATCTAAACAATGGATACCCCTCA<br>CCAGGCCCAGA                                                          | pNL0078                                  |
| BFck2StgbGZj | CTCACGAAGCTTGACTAACCATTACCCCGCC<br>ACATAGACACATCTAAACAATGGATACCCCTCA<br>CCAGGCCCAGA                                                          | pNL0077                                  |
| wjWoGo3FGbFT | ATCACCGCTAGAACGTCTATCTCATCACCGA<br>CTTCTCATCCATCTTCAAATGCAGGACGAA<br>GTCAACCAATACGTAGA                                                       | pNL0078                                  |
| upKMOhU4YeUT | CCATCATTCTTAGAGAACTCCTCTCTCAGA<br>ACCACCACAAACCATCACATGACTGTGCTG<br>AAACCACAAACAGTCAGACCACGTTTAGCGA<br>CGCCTTCCGGAGCAGGTCTGGCCAGAGC<br>GCTCG | pNL0076<br>pNL0077<br>pNL0078            |
| tQe7cSidLbG6 | AAAAGCCATGCCTTCGTGAT                                                                                                                         | pNL0077<br>pNL0078                       |
| CNSA15FuTAQY | AAGCATTTCAGCCCTTTTCTATGGGACAAAG<br>G                                                                                                         | pNL0077<br>pNL0078                       |
| XfMEmpkDDwcf | AAATGGGATTGTCTTGGTCAATCAAG                                                                                                                   | pNL0078                                  |

|                                       |                                                                                                 |                                          |
|---------------------------------------|-------------------------------------------------------------------------------------------------|------------------------------------------|
| eGyscqDZ04ul                          | TTGCTTCGAAGACCTCATAGAATTTATGTCGC<br>T                                                           | pNL0075<br>pNL0076<br>pNL0077<br>pNL0078 |
| F7QLyNHITmSz                          | GCCACAGCTTGATGTAGCTTAGACCCT                                                                     | pNL0075<br>pNL0076<br>pNL0077<br>pNL0078 |
| GcGhrSiIH3uE                          | TAGGATATTTGCCAATGTCAAAGACTTCCGGT<br>AGTGTTCACTCCATCCATCTATCCATACTGAG<br>AAAGTCGAGGGAACAGC       | pNL0078                                  |
| dN2hEszOWCod                          | ATAATGAACCTCCAAGATGTATCCTAAGTCGG<br>TAACCTCATTCTCGGCACCTACAAATGATCGA<br>ACAGAAATTTATAACCCGGAGCA | pNL0075                                  |
| 2qRtP7v2KLxc                          | GTTGGGCAGTTATTTGCAATGA                                                                          | pNL0078                                  |
| JWW4zkZUMH9T                          | GGTGAAGTTGTGTATGTT                                                                              | pNL0078                                  |
| of4jnKXZfyCv                          | TTTGAAGATGGATGAGAAGTCG                                                                          | pNL0078                                  |
| W44RR81Xl4Rj                          | TGTGATGGTTTGGTGGTTCTGAG                                                                         | pNL0076<br>pNL0077<br>pNL0078            |
| gV8gwo6LEMES                          | TTTTAGGTATATTTTGGACGTGGATCAC                                                                    | pNL0076<br>pNL0077<br>pNL0078            |
| 3FnizHFBw2tm                          | ACCCAACACGCATCACGTCCAATCCGCACAT<br>GAAGGGCTAATTTATAAAATTACAGCCGGCGT<br>TTGAGATAAACCTT           | pNL0078                                  |
| PG89RXoqsKn2                          | ATAATGAACCTCCAAGATGTATCCTAAGTCGG<br>TAACCTCATTCTCGGCACCTACAGCCGGCGT<br>TTGAGATAAACCTT           | pNL0077                                  |
| KV3mrYD8bFTx                          | ATAATGAACCTCCAAGATGTATCCTAAGTCGG<br>TAACCTCATTCTCGGCACCTATTCTTGATTG<br>TGACCTCGAGAAGGC          | pNL0078                                  |
| bGzWwY1UA4GK                          | CTTGGACCCGATGCAATTCTTTGTCC                                                                      | pNL0076<br>pNL0077<br>pNL0078            |
| tWYOXTqwoABz                          | TGTTTAGATGTGTCTATGTG                                                                            | pNL0077<br>pNL0078                       |
| D9dyHRY2ejYY                          | TTCACCTAGTGGATTTCTAGCATAACATC                                                                   | pNL0077<br>pNL0078                       |
| hqWDueMahlut                          | ATAATGAACCTCCAAGATGTATCCTAAGTC                                                                  | pNL0076                                  |
| DY092 1035 coxAp<br>amidohydrolase F  | GTTCTCCACGCCTTGTCGGTTGGCATTGCAC<br>CCACAATGGTGGGCACAATTGACACACAC                                | pNL0079                                  |
| DY093 1035 amidohydrolase<br>tAN717 R | ATCCTAAGTCGGTAACCTCATTCTCGGCACC<br>TATCCATACTGAGAAAGTCGAGGGAACAG                                | pNL0079                                  |
| HX1035-SDR-fix-F                      | CACGCCTTGTCGGTTGGCATTGCACCCACAA<br>TGTATTCAATTTCAAGGCCACCCAGGACC                                | pNL0080                                  |

|                           |                                                                  |         |
|---------------------------|------------------------------------------------------------------|---------|
| HX1035-SDR-fix-R          | CTAAGTCGGTAACCTCATTCTCGGCACTCATT<br>GATTACTACTAACACGTACATAGTGCCC | pNL0080 |
| coxAp 1012 glyoxalase     | AGTTCTCCACGCCTTGTCCGTTGGCATTGCA<br>CCCACAATGCACCCACTGAATAACACCCC | pNL0082 |
| 1012 glyoxalase tAN0717 R | CCTCCAAGATGTATCCTAAGTCGGTAACCTCA<br>TTCTCGGCACTTAGGGCTCGCTCGGGGG | pNL0082 |
| HX1021-HP-F-coxA          | CACGCCTTGTCCGTTGGCATTGCACCCACAA<br>TGCCCTCGGGATATTGTCTCTTTTCTC   | pNL0081 |
| HX1021-HP-R-tAN0717       | ATCCTAAGTCGGTAACCTCATTCTCGGCACTT<br>AATCAGAATTACACGTCCGAGGG      | pNL0081 |

**Table S2: Plasmids used in this study**

| Plasmid | Genes Expressed  | Backbone Plasmid |
|---------|------------------|------------------|
| pNL0075 | <i>rosA</i>      | pHex317          |
| pNL0076 | <i>rosAB</i>     | pHex317          |
| pNL0077 | <i>rosABC</i>    | pHex317          |
| pNL0078 | <i>rosABCDEH</i> | pHex317          |
| pNL0079 | <i>rosD</i>      | pHex318          |
| pNL0080 | <i>rosE</i>      | pHex344          |
| pNL0081 | Aspuva1_93046    | pHex344          |
| pNL0082 | <i>rosG</i>      | pHex318          |
| pNL0083 | empty plasmid    | pHex344          |
| pNL0084 | empty plasmid    | pHex317          |
| pNL0085 | Aspuva1_365195   | pHex385          |
| pNL0086 | empty plasmid    | pHex385          |

**Table S3: Engineered strains used in this study**

| Strains | Description                                                     | Plasmids contained      | Parent Strain    |
|---------|-----------------------------------------------------------------|-------------------------|------------------|
| AN0045  | <i>A. nidulans</i> expressing <i>prosJKB</i>                    | pNL0076+pNL0079+pNL0083 | bghX17           |
| AN0046  | <i>A. nidulans</i> expressing <i>prosJKAB</i>                   | pNL0077+pNL0079+pNL0083 | bghX17           |
| AN0047  | <i>A. nidulans</i> expressing <i>prosJKBC</i>                   | pNL0076+pNL0079+pNL0080 | bghX17           |
| AN0048  | <i>A. nidulans</i> expressing <i>prosJKABC</i>                  | pNL0077+pNL0079+pNL0080 | bghX17           |
| AN0049  | <i>A. nidulans</i> expressing <i>prosJKAB+Aspuva1_93046</i>     | pNL0077+pNL0079+pNL0081 | bghX17           |
| AN0050  | <i>A. nidulans</i> expressing <i>prosJKABCGDF</i>               | pNL0078+pNL0082+pNL0083 | bghX17           |
| AN0051  | <i>A. nidulans</i> expressing <i>prosJKABCGDF+Aspuva1_93046</i> | pNL0078+pNL0082+pNL0081 | bghX17           |
| AN0052  | <i>A. nidulans</i> expressing <i>prosJKABCGF+Aspuva1_93046</i>  | pNL0078+pNL0084+pNL0081 | bghX17           |
| AN0053  | <i>A. nidulans</i> expressing <i>prosJ</i>                      | pNL0075                 | bghX18           |
| AN0054  | <i>A. nidulans</i> expressing <i>prosJK</i>                     | pNL0076                 | bghX18           |
| AN0055  | <i>A. nidulans</i> expressing <i>prosJKA</i>                    | pNL0077                 | bghX18           |
| AN0056  | <i>A. nidulans</i> expressing <i>prosJKABCF</i>                 | pNL0078                 | bghX18           |
| AU0001  | <i>A. uvarum</i> with empty <i>pHex385</i> plasmid              | pNL0086                 | <i>A. uvarum</i> |
| AU0002  | <i>A. uvarum</i> expressing <i>rosH</i>                         | pNL0085                 | <i>A. uvarum</i> |
| AU0003  | <i>A. uvarum</i> with KO of <i>rosJ</i>                         |                         | <i>A. uvarum</i> |

**Table S4: Comparison of homologous clusters in *A. uvarum* and TTI001159**

| TTI001159    | <i>A. uvarum</i> | Putative Function                  | % Identity |
|--------------|------------------|------------------------------------|------------|
| <i>prosJ</i> | <i>rosJ</i>      | NR-PKS(SAT-KS-AT-PT-ACP-ACP-MT-TE) | 50.94%     |
| <i>prosK</i> | <i>rosK</i>      | P450                               | 62.73%     |
| <i>prosA</i> | <i>rosA</i>      | P450                               | 70.29%     |
| <i>prosB</i> | <i>rosB</i>      | Amidohydrolase                     | 75.08%     |
| <i>prosC</i> | <i>rosC</i>      | Reductase                          | 64.67%     |
| <i>prosG</i> | <i>rosG</i>      | CDK2                               | 65.41%     |
| <i>prosD</i> | <i>rosD</i>      | Glyoxylase                         | 53.89%     |
| <i>prosF</i> | <i>rosF</i>      | Methyltransferase                  | 74.50%     |
| <i>prosH</i> | <i>rosH</i>      | Transcription Factor               | 25.58%     |
| <i>prosl</i> | <i>rosl</i>      | Transporter                        | 63.72%     |
| -            | <i>rosE</i>      | Hypothetical Protein               |            |

**Table S5. IDs of sequences used for phylogenetic trees.**

| <b>Protein</b>        | <b>Uniprot ID</b> | <b>Protein</b>  | <b>Uniprot ID</b> |
|-----------------------|-------------------|-----------------|-------------------|
| CDK1                  | P06493            | CLK3            | P49761            |
| CDK2                  | P24941            | Aurora A        | O14965            |
| CDK3                  | Q00526            | CK2 $\alpha$ 1  | P68400            |
| CDK4                  | P11802            | IKK $\beta$     | O14920            |
| CDK5                  | Q00535            | CK1 $\alpha$ 1  | P48729            |
| CDK6                  | Q00534            | CK1 $\gamma$ 1  | Q9HCP0            |
| CDK7                  | P50613            | PKC $\alpha$    | P17252            |
| CDK8                  | P49336            | ROCK1           | Q13464            |
| CDK9                  | P50750            | AKT1            | P31749            |
| CDK10                 | Q15131            | FGFR1           | P11362            |
| CDK11A                | Q9UQ88            | JAK3            | P52333            |
| CDK11B                | P21127            | LCK             | P06239            |
| CDK12                 | Q9NYV4            | SYK             | P43405            |
| CDK13                 | Q14004            | MINK1           | Q8N4C8            |
| CDK14                 | O94921            | PAK1            | Q13153            |
| CDK15                 | Q96Q40            | IRAK4           | Q9NWZ3            |
| CDK16                 | Q00536            | TAK1            | O43318            |
| CDK17                 | Q00537            | GSK3 $\beta$    | P49841            |
| CDK18                 | Q07002            | p38 $\alpha$    | Q16539            |
| CDK19                 | Q9BWU1            | AMPK $\alpha$ 1 | Q13131            |
| CDK20                 | Q8IZL9            | CAMK4           | Q16566            |
| GSK3a                 | P49840            | CHK1            | O14757            |
| <i>A. uvarum</i> RosG | XP_025491502.1    | DAPK1           | P53355            |
|                       |                   | MAPKAPK2        | P49137            |

**Table S6. Data collection and processing statistics for CDK2 structure**

| <b>Roseopurpurin C (1)</b>         |                                                |
|------------------------------------|------------------------------------------------|
| X-ray source                       | PXII/X10SA (SLS <sup>1</sup> )                 |
| Wavelength [Å]                     | 0.9999                                         |
| Detector                           | Dectris EIGER2 Si 16M                          |
| Temperature [K]                    | 100                                            |
| Space group                        | P 2 <sub>1</sub> 2 <sub>1</sub> 2 <sub>1</sub> |
| Cell: a; b; c; [Å]                 | 54.36; 72.69; 72.96                            |
| α; β; γ; [°]                       | 90.0; 90.0; 90.0                               |
| Resolution [Å]                     | 2.62 (2.66-2.62)                               |
| Unique reflections                 | 8294 (316)                                     |
| Multiplicity                       | 4.3 (2.1)                                      |
| Completeness [%]                   | 90.6 (70.7)                                    |
| R <sub>pin</sub> [%] <sup>5</sup>  | 5.6 (43.7)                                     |
| R <sub>sym</sub> [%] <sup>3</sup>  | 11.5 (59.4)                                    |
| R <sub>meas</sub> [%] <sup>4</sup> | 12.9 (74.2)                                    |
| CC1/2 [%]                          | 99.50 (73-90)                                  |
| Mean(I)/sd <sup>6</sup>            | 8.8 (1.3)                                      |

<sup>1</sup> SWISS LIGHT SOURCE (SLS, Villigen, Switzerland)

<sup>2</sup> values in parenthesis refer to the highest resolution bin.

$$^3 R_{sym} = \frac{\sum_h \sum_i^{n_h} |\hat{I}_h - I_{h,i}|}{\sum_h \sum_i^{n_h} I_{h,i}} \text{ with } \hat{I}_h = \frac{1}{n_h} \sum_i^{n_h} I_{h,i}$$

where  $I_{h,i}$  is the intensity value of the  $i$ th measurement of  $h$



**Table S7. CDK2 structure refinement statistics**

---

| <b>Ligand</b>                               | <b>Roseopurpurin C (1)</b> |
|---------------------------------------------|----------------------------|
| Resolution [Å]                              | 51.49-2.62                 |
| Number of reflections (working /test)       | 7872 / 417                 |
| R <sub>cryst</sub> [%]                      | 22.0                       |
| R <sub>free</sub> [%]                       | 28.3                       |
| Total number of atoms:                      |                            |
| Protein                                     | 2211                       |
| Water                                       | 39                         |
| Ligand                                      | 25                         |
| Glycerol                                    | 6                          |
| Deviation from ideal geometry: <sup>2</sup> |                            |
| Bond lengths [Å]                            | 0.005                      |
| Bond angles [°]                             | 1.51                       |
| Bonded B's [Å <sup>2</sup> ] <sup>3</sup>   | 0.5                        |
| Ramachandran plot: <sup>4</sup>             |                            |
| Most favoured regions [%]                   | 93.66                      |
| Additional allowed regions [%]              | 5.97                       |
| Generously allowed regions [%]              | 1.35                       |
| Disallowed regions [%]                      | 0.88                       |

---

<sup>1</sup> Values as defined in REFMAC5, without sigma cut-off

<sup>2</sup> Root mean square deviations from geometric target values

<sup>3</sup> Calculated with MOLEMAN

<sup>4</sup> Calculated with PROCHECK

**Table S8. NMR Spectroscopic data for 1 (Roseopurpurin C)**

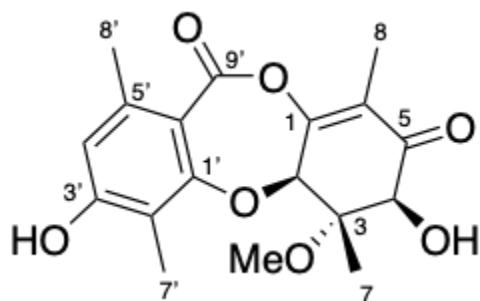

| Position | Found      |                         | Literature <sup>1</sup> |                         |
|----------|------------|-------------------------|-------------------------|-------------------------|
|          | $\delta_c$ | $\delta_H$ , m(J in Hz) | $\delta_c$              | $\delta_H$ , m(J in Hz) |
| 1        | 162.8      |                         | 162.7                   |                         |
| 2        | 82.1       | 5.24, q (2.0)           | 82                      | 5.24, d (2.0)           |
| 3        | 84.8       |                         | 84.9                    |                         |
| 4        | 76.5       | 4.41, s                 | 76.4                    | 4.4, s                  |
| 5        | 198.9      |                         | 198.9                   |                         |
| 6        | 118.5      |                         | 118.7                   |                         |
| 7        | 13.4       | 1.14, s                 | 13.3                    | 1.14, s                 |
| 8        | 8.6        | 1.88, d (2.0)           | 8.6                     | 1.88, d (2.0)           |
| 3-OMe    | 51.1       | 3.41, s                 | 51.1                    | 3.41, s                 |
| 1'       | 161.1      |                         | 161.2                   |                         |
| 2'       | 115.8      |                         | 115.5                   |                         |
| 3'       | 164.2      |                         | 162.5                   |                         |
| 4'       | 115.9      | 6.58, s                 | 115.7                   | 6.59, s                 |
| 5'       | 144.4      |                         | 144.5                   |                         |
| 6'       | 112.5      |                         | 112.5                   |                         |
| 7'       | 8.6        | 2.18, s                 | 8.6                     | 2.18, s                 |
| 8'       | 22.3       | 2.45, s                 | 22.3                    | 2.45, s                 |
| 9'       | 162.7      |                         | 162.9                   |                         |

In CD<sub>3</sub>OD, 600 MHz for <sup>1</sup>H and 150 MHz for <sup>13</sup>C NMR; Chemical shifts are reported in ppm. All signals are determined by <sup>1</sup>H, <sup>13</sup>C, HSQC and HMBC correlation.

HRMS (M+H)<sup>+</sup> *m/z* calculated for (C<sub>18</sub>H<sub>20</sub>O<sub>7</sub>+H)<sup>+</sup> 349.1282; found 349.1274.

**Table S9. NMR Spectroscopic data for 6 (4-O-demethylbarbatic acid)**

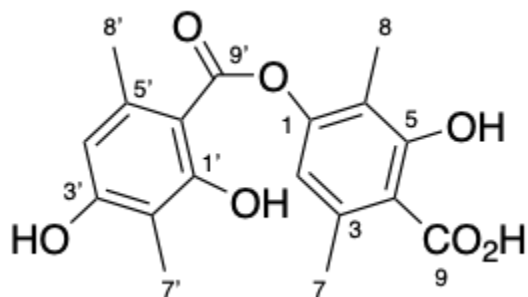

| Position | Found (CD <sub>3</sub> OD) |                         | Reported (Acetone-d <sub>6</sub> ) <sup>2</sup> |                         |
|----------|----------------------------|-------------------------|-------------------------------------------------|-------------------------|
|          | $\delta_c$                 | $\delta_H$ , m(J in Hz) | $\delta_c$                                      | $\delta_H$ , m(J in Hz) |
| 1        | 153.7                      |                         | 153                                             |                         |
| 2        | 117.5                      | 6.54, s                 | 116.7                                           | 6.72, s                 |
| 3        | 141.6                      |                         | 140.9                                           |                         |
| 4        | 111.3                      |                         | 109.6                                           |                         |
| 5        | 164.3                      |                         | 164                                             |                         |
| 6        | 117.6                      |                         | 117.5                                           |                         |
| 7        | 24                         | 2.59, s                 | 23                                              | 2.68, s                 |
| 8        | 9.4                        | 2.02, s                 | 7.3                                             | 2.04, s                 |
| 9        | 175.1                      |                         | 170.4                                           |                         |
| 1'       | 165.5                      |                         | 163.3                                           |                         |
| 2'       | 110.5                      |                         | 109.2                                           |                         |
| 3'       | 162.5                      |                         | 160.5                                           |                         |
| 4'       | 112.2                      | 6.33, s                 | 111.3                                           | 6.47, s                 |
| 5'       | 141.4                      |                         | 140.7                                           |                         |
| 6'       | 104                        |                         | 103.6                                           |                         |
| 7'       | 9.5                        | 2.03, s                 | 8.7                                             | 2.05, s                 |
| 8'       | 24.7                       | 2.58, s                 | 23.7                                            | 2.63, s                 |
| 9'       | 171.5                      |                         | 170.4                                           |                         |

In CD<sub>3</sub>OD, 600 MHz for <sup>1</sup>H and 150 MHz for <sup>13</sup>C NMR; Chemical shifts are reported in ppm. All signals are determined by <sup>1</sup>H, <sup>13</sup>C, HSQC and HMBC correlation.

HRMS (M+H)<sup>+</sup> *m/z* calculated for (C<sub>18</sub>H<sub>18</sub>O<sub>7</sub>+H)<sup>+</sup> 347.1125; found 347.1117.

Table S10. NMR Spectroscopic data for 7 (Hypoprotocetraric acid)

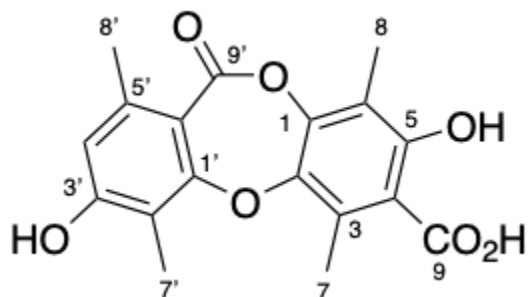

| Position | Found (CD3OD) |                         | Literature (CDCl3, DMSO- <i>d</i> 6) <sup>3</sup> |                         |
|----------|---------------|-------------------------|---------------------------------------------------|-------------------------|
|          | $\delta_C$    | $\delta_H$ , m(J in Hz) | $\delta_C$                                        | $\delta_H$ , m(J in Hz) |
| 1        | 148.5         |                         |                                                   |                         |
| 2        | 144.2         |                         |                                                   |                         |
| 3        | 131.1         |                         |                                                   |                         |
| 4        | 111.3         |                         |                                                   |                         |
| 5        | 160.1         |                         |                                                   |                         |
| 6        | 116.5         |                         |                                                   |                         |
| 7        | 18.3          | 2.70, s                 | 2.66, s                                           |                         |
| 8        | 9.1           | 2.19, s                 | 2.17, s                                           |                         |
| 9        | 174.8         |                         |                                                   |                         |
| 1'       | 162.8         |                         |                                                   |                         |
| 2'       | 114.5         |                         |                                                   |                         |
| 3'       | 162           |                         |                                                   |                         |
| 4'       | 115.5         | 6.56, s                 | 6.59, s                                           |                         |
| 5'       | 143.1         |                         |                                                   |                         |
| 6'       | 113.2         |                         |                                                   |                         |
| 7'       | 10.3          | 2.31, s                 | 2.28, s                                           |                         |
| 8'       | 21            | 2.36, s                 | 2.35, s                                           |                         |
| 9'       | 165           |                         |                                                   |                         |

In CD<sub>3</sub>OD, 600 MHz for <sup>1</sup>H and 150 MHz for <sup>13</sup>C NMR; Chemical shifts are reported in ppm. All signals are determined by <sup>1</sup>H, <sup>13</sup>C, HSQC and HMBC correlation.

HRMS (M+H)<sup>+</sup> *m/z* calculated for (C<sub>18</sub>H<sub>16</sub>O<sub>7</sub>+H)<sup>+</sup> 345.0969; found 345.0974.

**Table S11. NMR Spectroscopic data for 8 (3,8-dihydroxy-1,4,6,9-tetramethyl-dibenzo [b,e][1,4]dioxepin-11-one)**

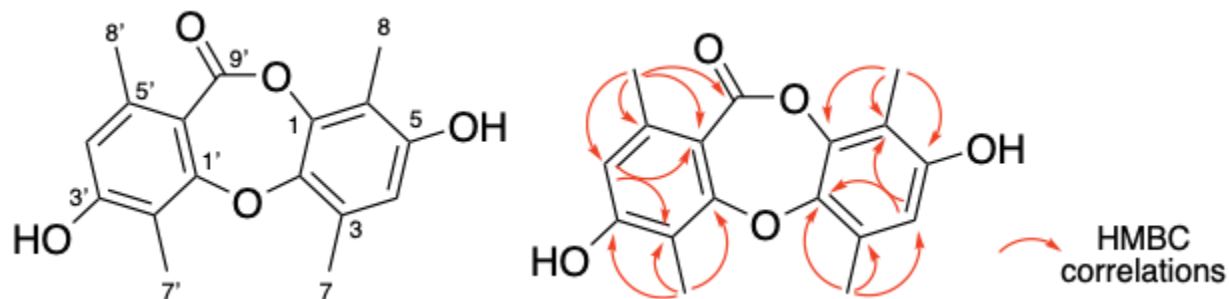

| <b>8</b> |            |                         |
|----------|------------|-------------------------|
| Position | $\delta_c$ | $\delta_H$ , m(J in Hz) |
| 1        | 145        |                         |
| 2        | 144.4      |                         |
| 3        | 128.1      |                         |
| 4        | 114        | 6.43, s                 |
| 5        | 153.8      |                         |
| 6        | 115.4      |                         |
| 7        | 17.8       | 2.35, s                 |
| 8        | 9.3        | 2.12, s                 |
| 1'       | 163.2      |                         |
| 2'       | 114.8      |                         |
| 3'       | 161.6      |                         |
| 4'       | 115.3      | 6.56, s                 |
| 5'       | 143.1      |                         |
| 6'       | 112.5      |                         |
| 7'       | 9.9        | 2.29, s                 |
| 8'       | 21.3       | 2.36, s                 |
| 9'       | 166.5      |                         |

In CD<sub>3</sub>OD, 600 MHz for <sup>1</sup>H and 150 MHz for <sup>13</sup>C NMR; Chemical shifts are reported in ppm. All signals are determined by <sup>1</sup>H, <sup>13</sup>C, HSQC and HMBC correlation.

HRMS (M+H)<sup>+</sup> *m/z* calculated for (C<sub>17</sub>H<sub>16</sub>O<sub>5</sub>+H)<sup>+</sup> 301.1070; found 301.1062.

**Table S12. NMR Spectroscopic data for 10 ( Roseopurpurin G)**

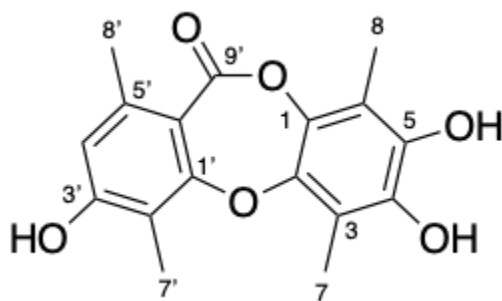

| Position | Found            |                               | Literature <sup>1</sup> |                               |
|----------|------------------|-------------------------------|-------------------------|-------------------------------|
|          | $\bar{\delta}_C$ | $\bar{\delta}_H$ , m(J in Hz) | $\bar{\delta}_C$        | $\bar{\delta}_H$ , m(J in Hz) |
| 1        | 137.6            |                               | 137.6                   |                               |
| 2        | 142.1            |                               | 142                     |                               |
| 3        | 115.6            |                               | 115.6                   |                               |
| 4        | 144.7            |                               | 144.7                   |                               |
| 5        | 142              |                               | 142.1                   |                               |
| 6        | 115.3            |                               | 115.2                   |                               |
| 7        | 10.8             | 2.31, s                       | 10.7                    | 2.31, s                       |
| 8        | 9.6              | 2.17, s                       | 9.6                     | 2.18, s                       |
| 1'       | 163.6            |                               | 163.5                   |                               |
| 2'       | 114.3            |                               | 114.3                   |                               |
| 3'       | 161.5            |                               | 161.3                   |                               |
| 4'       | 115.2            | 6.53, s                       | 115.2                   | 6.53, s                       |
| 5'       | 143              |                               | 142.9                   |                               |
| 6'       | 113.6            |                               | 113.6                   |                               |
| 7'       | 10.0             | 2.30, s                       | 10                      | 2.30, s                       |
| 8'       | 21.4             | 2.35, s                       | 21.3                    | 2.35, s                       |
| 9'       | 167.7            |                               | 167.1                   |                               |

In CD<sub>3</sub>OD, 600 MHz for <sup>1</sup>H and 150 MHz for <sup>13</sup>C NMR; Chemical shifts are reported in ppm. All signals are determined by 1H, 13C, HSQC and HMBC correlation.

HRMS (M+H)<sup>+</sup> *m/z* calculated for (C<sub>17</sub>H<sub>16</sub>O<sub>6</sub>+H)<sup>+</sup> 317.1020; found 317.1010.

**Table S13. NMR Spectroscopic data for 11 (Aculeatusquinone C)**

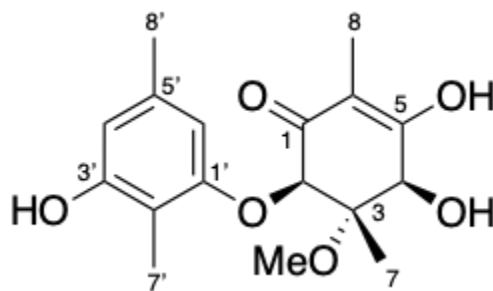

| Position | Found              |                         | Literature <sup>1</sup> |                         |
|----------|--------------------|-------------------------|-------------------------|-------------------------|
|          | $\delta_C$         | $\delta_H$ , m(J in Hz) | $\delta_C$              | $\delta_H$ , m(J in Hz) |
| 1        | 190.3 <sup>a</sup> |                         |                         | nd                      |
| 2        | 82.3               | 5.07, s                 | 82.1                    | 5.07, br s              |
| 3        | 84.6               |                         | 84.5                    |                         |
| 4        | 72.2               | 4.67, s                 | 72.1                    | 4.67, br s              |
| 5        | 178.7 <sup>a</sup> |                         |                         | nd                      |
| 6        | 109.4              |                         | 109.4                   |                         |
| 7        | 13.0               | 1.23, s                 | 13.0                    | 1.24, s                 |
| 8        | 7.7                | 1.73, s                 | 7.7                     | 1.73, s                 |
| 3-OMe    | 51.1               | 3.20, s                 | 51.1                    | 3.21, s                 |
| 1'       | 159.7              |                         | 159.6                   |                         |
| 2'       | 111.8              |                         | 111.9                   |                         |
| 3'       | 156.8              |                         | 156.9                   |                         |
| 4'       | 110.5              | 6.28, s                 | 110.3                   | 6.28, s                 |
| 5'       | 136.9              |                         | 137.0                   |                         |
| 6'       | 107.3              | 6.29, s                 | 107.1                   | 6.30, br s              |
| 7'       | 8.7                | 2.1, s                  | 8.7                     | 2.1, s                  |
| 8'       | 21.6               | 2.19, s                 | 21.6                    | 2.19, s                 |

In CD<sub>3</sub>OD, 600 MHz for <sup>1</sup>H and 150 MHz for <sup>13</sup>C NMR; Chemical shifts are reported in ppm. All signals are determined by <sup>1</sup>H, <sup>13</sup>C, HSQC and HMBC correlation.

<sup>a</sup> Determined by HMBC correlations

HRMS (M+H)<sup>+</sup> *m/z* calculated for (C<sub>17</sub>H<sub>21</sub>O<sub>6</sub>+H)<sup>+</sup> 323.1489; found 323.1476.

**Table S14. NMR Spectroscopic data for 12 (Roseopurpurin D)**

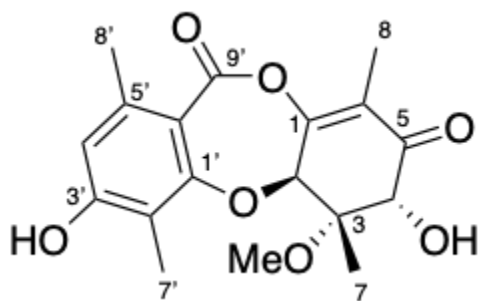

| Position | Found            |                               | Literature <sup>1</sup> |                               |
|----------|------------------|-------------------------------|-------------------------|-------------------------------|
|          | $\bar{\delta}_C$ | $\bar{\delta}_H$ , m(J in Hz) | $\bar{\delta}_C$        | $\bar{\delta}_H$ , m(J in Hz) |
| 1        | 157.1            |                               | 157.1                   |                               |
| 2        | 18.7             | 4.99, s                       | 78.7                    | 4.98, s                       |
| 3        | 81.6             |                               | 81.5                    |                               |
| 4        | 77.3             | 4.39, s                       | 77.3                    | 4.39, s                       |
| 5        | 198.3            |                               | 198.3                   |                               |
| 6        | 119.3            |                               | 119.3                   |                               |
| 7        | 16.5             | 1.68, s                       | 16.4                    | 1.67, s                       |
| 8        | 7.9              | 1.75, s                       | 7.9                     | 1.76, s                       |
| 3-OMe    | 52.1             | 3.33, s                       | 52.1                    | 3.34, s                       |
| 1'       | 161.0            |                               | 161.0                   |                               |
| 2'       | 112.8            |                               | 112.8                   |                               |
| 3'       | 157.4            |                               | 157.4                   |                               |
| 4'       | 114.0            | 6.49, s                       | 113.9                   | 6.49, s                       |
| 5'       | 141.7            |                               | 141.7                   |                               |
| 6'       | 109.9            |                               | 109.8                   |                               |
| 7'       | 9.0              | 2.07, s                       | 8.9                     | 2.08, s                       |
| 8'       |                  | 22.8 2.37, s                  | 22.7                    | 2.37, s                       |
| 9'       |                  | 164.2                         | 164.2                   |                               |

In CD<sub>3</sub>OD, 600 MHz for <sup>1</sup>H and 150 MHz for <sup>13</sup>C NMR; Chemical shifts are reported in ppm. All signals are determined by <sup>1</sup>H, <sup>13</sup>C, HSQC and HMBC correlation.

HRMS (M+H)<sup>+</sup> *m/z* calculated for (C<sub>18</sub>H<sub>20</sub>O<sub>7</sub>+H)<sup>+</sup> 349.1282; found 349.1267.



## Supplementary Figures

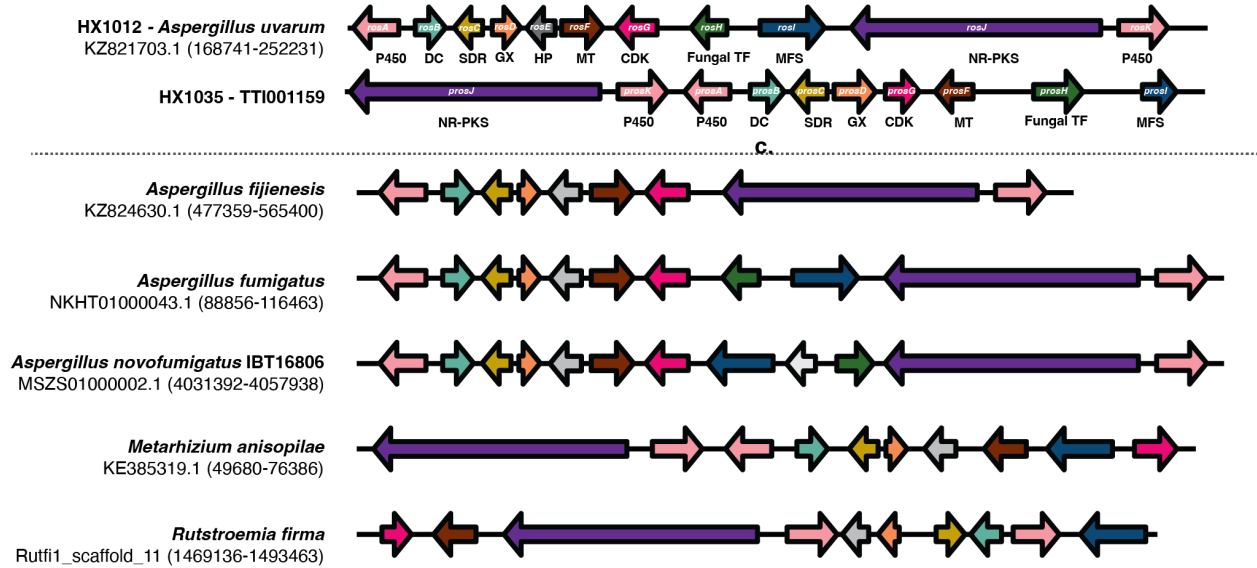

**Figure S1: Homologous BGCs containing resistance genes with homology to human CDK2 occur across multiple genomes.** Nucleotide sequence and coordinates (either NCBI or JGI ids) are denoted beneath the organism name.

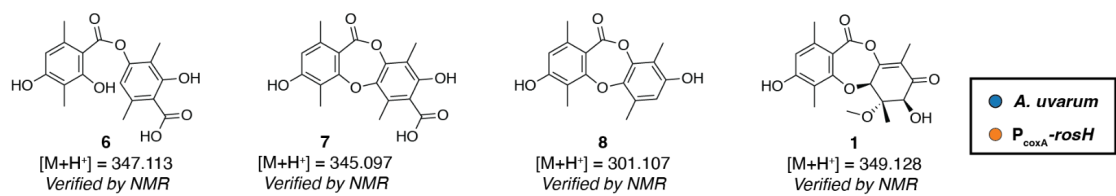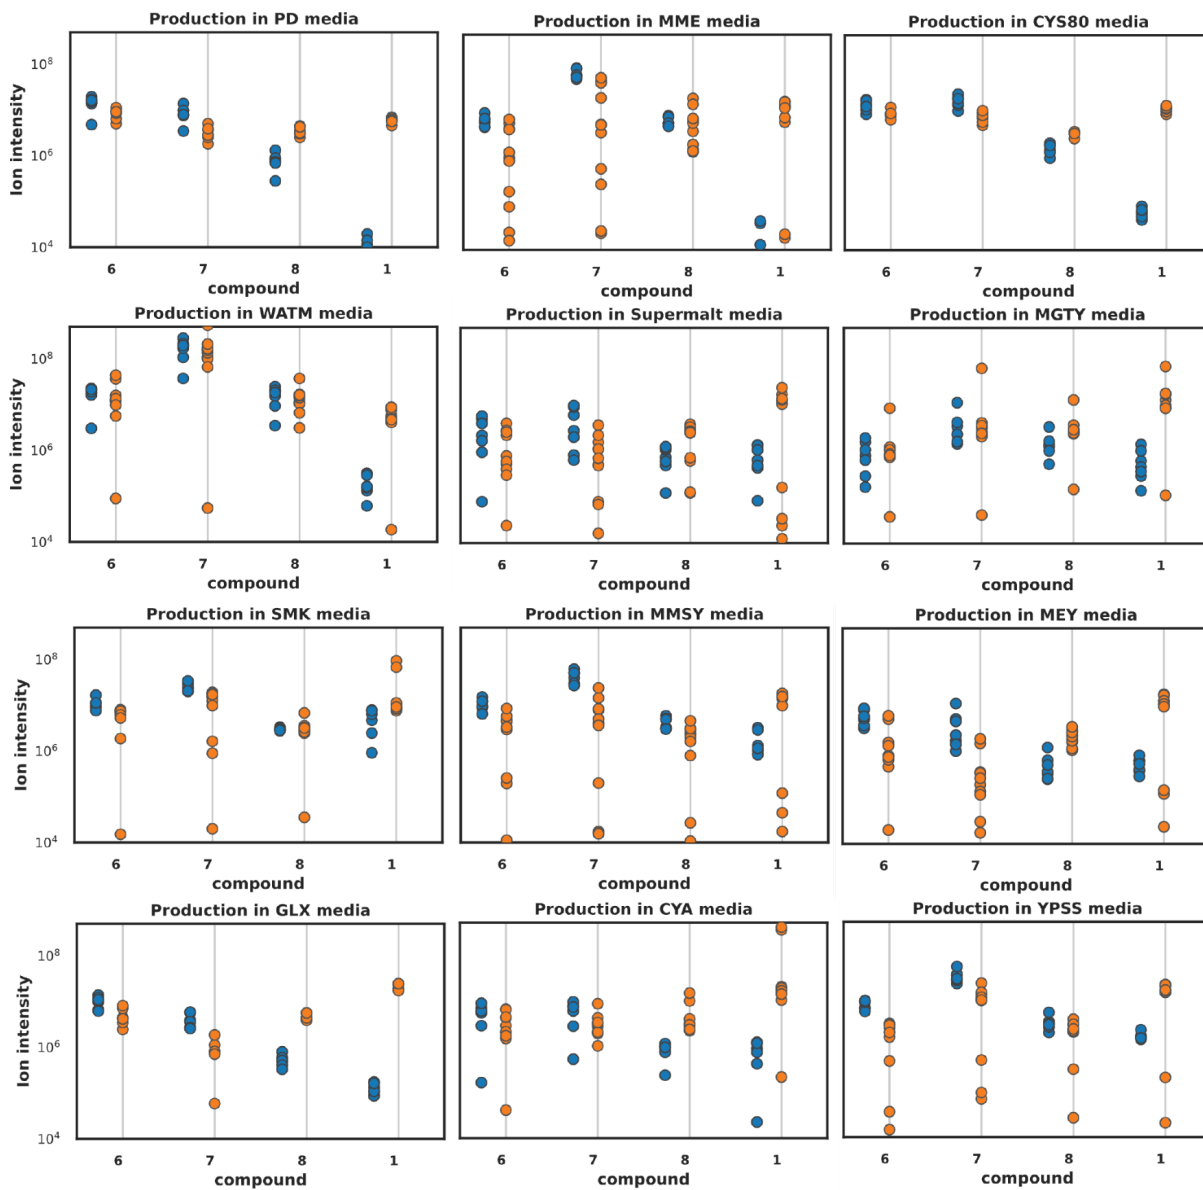

**Figure S2: Production of 1 and precursors in wild-type and engineered *A. uvarum* across cultures in multiple media.** All ion intensities represent the maximum intensity of the [M+H]<sup>+</sup> ion for each compound. All measurements were taken on 6 biological replicates (n=6).

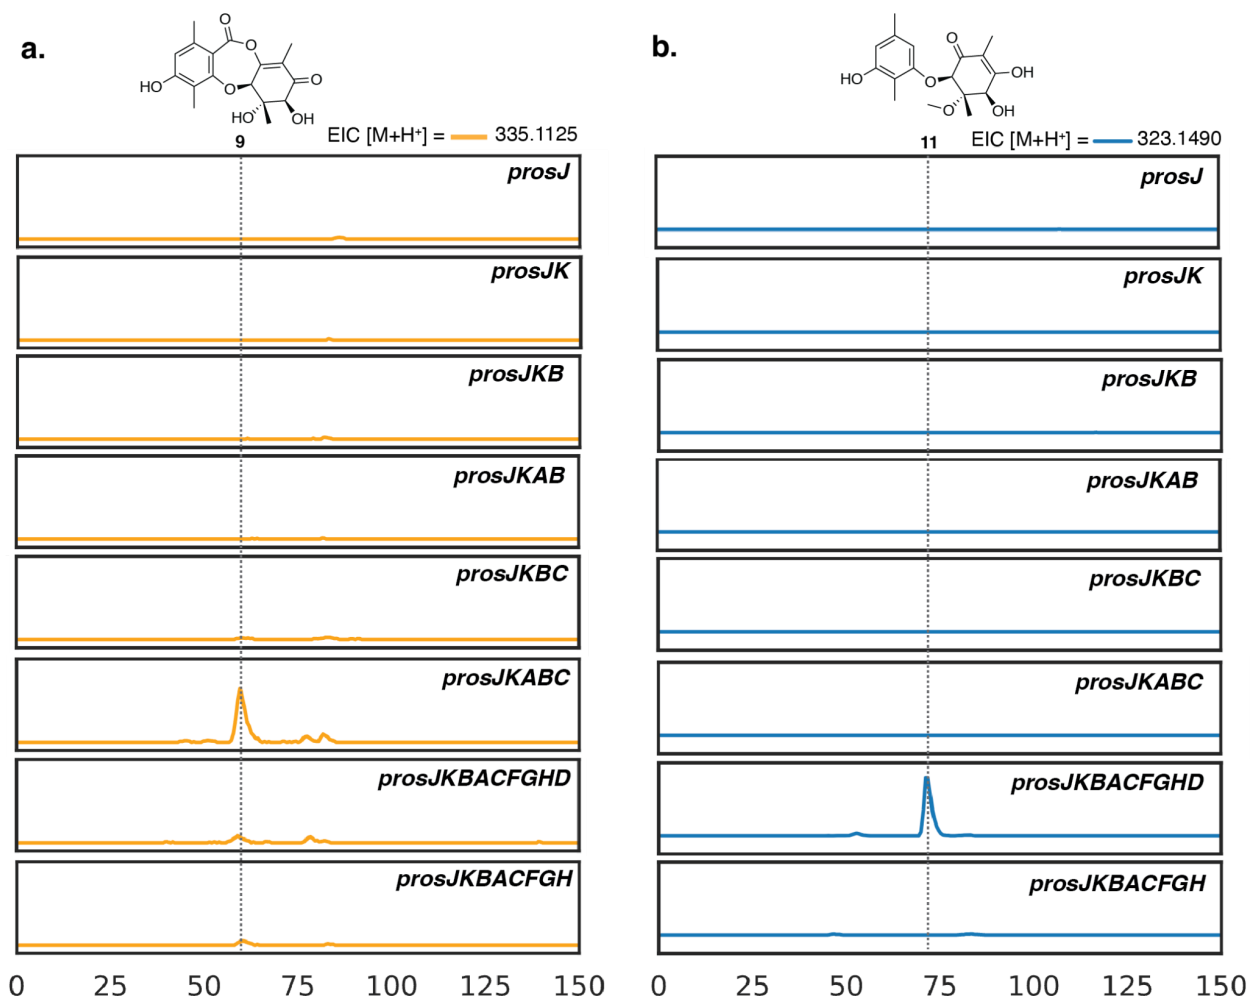

**Figure S3: Characterization of the biosynthesis of 1 by heterologous expression in *A. nidulans*.** **a.** Intermediate **9** is produced with the concerted expression of the core NR-PKS (*prosJ*), cytochrome p450s (*prosA*, *prosk*), the decarboxylase (*prosB*), and the reductase (*prosc*). **b.** Compound **11** is produced only in the presence of glyoxalase *prosD*. EIC = extracted ion chromatogram.

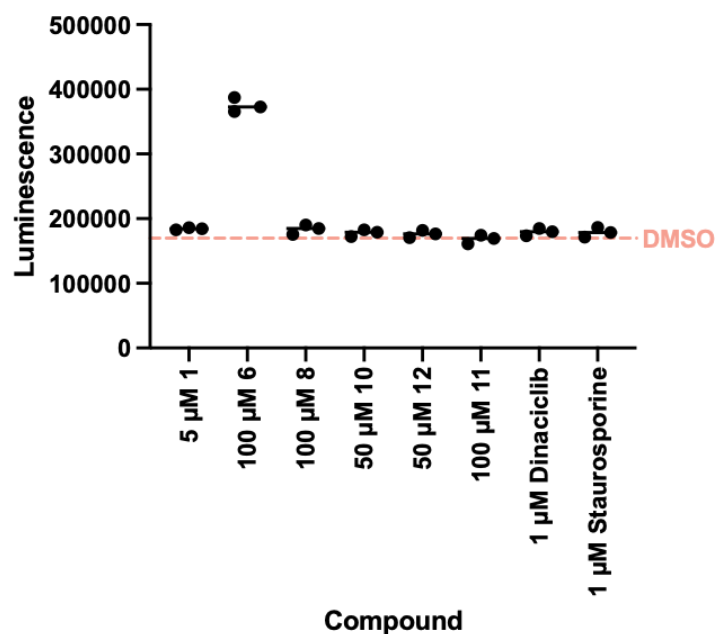

**Figure S4. BGC HX1012/HX1035-derived metabolites do not inhibit the ADP-detection assay.** Metabolites **1**, **6**, **8**, **10**, **11**, and **12** were tested for interference of ADP detection in the ADP-Glo (Promega) assay. Assays were performed by replacing CDK2/cyclin E1 with 10 μM ADP. No metabolite inhibited the detection of ADP by the ADP-Glo assay; however, **6** showed a 2-fold increase in luminescence signal relative to the DMSO control.

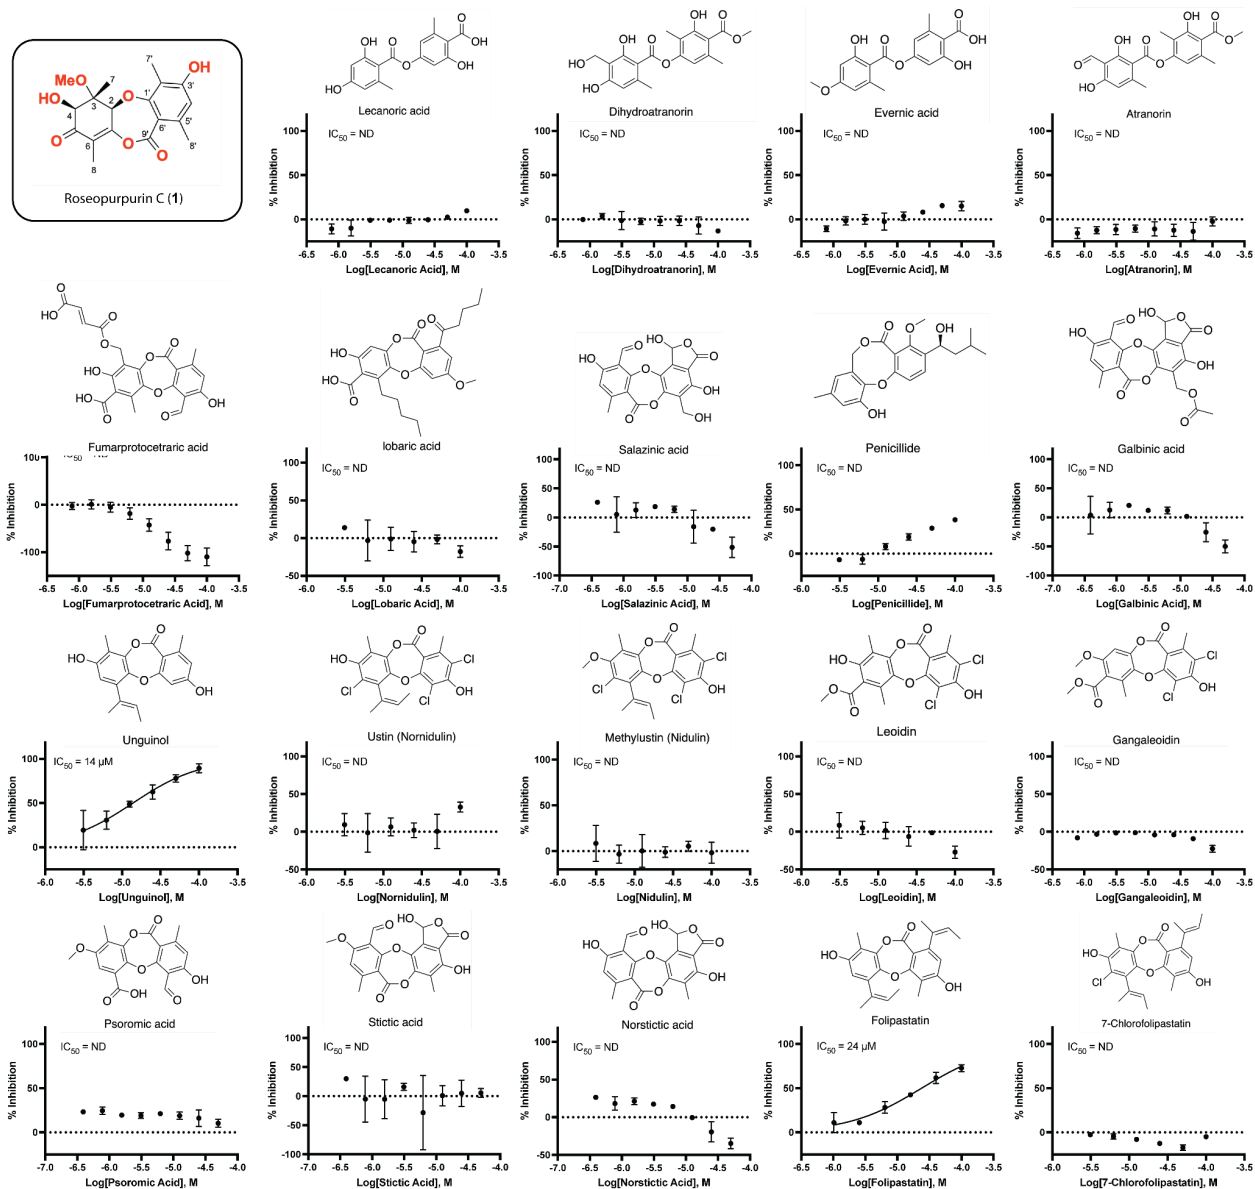

**Figure S5. Commercial depsides and depsidones are not potent inhibitors of CDK2/cyclin E1-dependent Histone H1 phosphorylation.** 19 commercially available depsides and depsidones were assayed for inhibition of CDK2/cyclin E1-dependent phosphorylation of Histone H1 using the luciferase-dependent ADP-detection assay. Data represent the average  $\pm$  the standard deviation of the mean,  $n=2$ . Inhibition  $>50\%$  was only observed for unguinol ( $IC_{50} = 14 \mu\text{M}$ ) and folipastatin ( $IC_{50} = 24 \mu\text{M}$ ). Fumarprotocetraric acid treatment increased luminescence values rather than suppressing them. ND = not determined; inhibition did not exceed 50% at the highest concentration tested (100  $\mu\text{M}$ ). The structure of **1** is shown for reference.

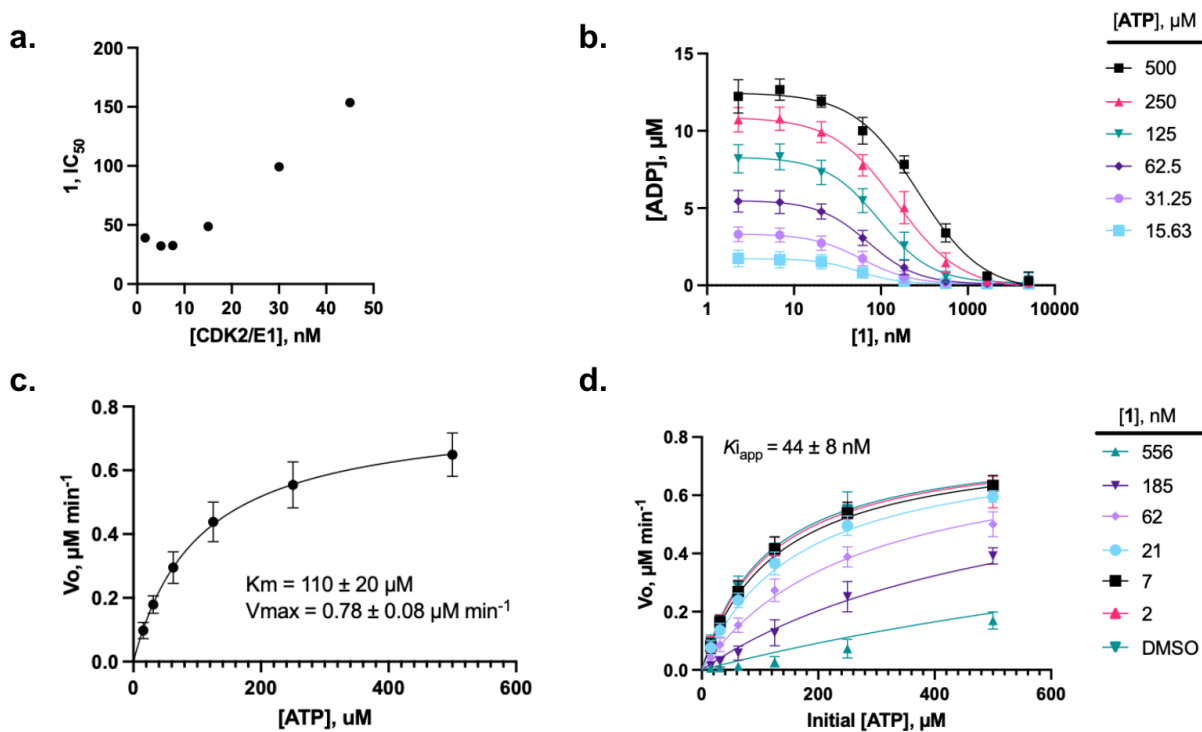

**Figure S6. 1 is an ATP-competitive inhibitor of CDK2 displaying tight-binding inhibition, a) 1** displays tight binding inhibition of cyclin E1-activated CDK2 phosphorylation of histone H1. The  $IC_{50}$  of **1** was determined at variable concentrations of CDK2/cyclin E1. Tight binding inhibition was observed at enzyme concentrations greater than 7.5 nM. **b)** The  $IC_{50}$  of **1** is dependent on the concentration of ATP. Data represent the average  $\pm$  standard deviation,  $n=4$ . Dose response curves were fitted in PRISM 9 using a 4-parameter inhibitor fit equation.  $IC_{50}$  were plotted in **Figure 3c**. **c)** CDK2/cyclin E1 Michaelis-Menten curve for ATP performed with histone H1 peptide. Data represent the average  $\pm$  standard deviation,  $n=13$ . Data were fit using the Michaelis-Menten equation using PRISM 9.  $K_m$  and  $V_{max}$  values were calculated for each replicate and are reported as the mean  $\pm$  standard deviation ( $n=13$ ). **d)** Michaelis-Menten curve for ATP with variable concentrations of **1** performed with histone H1 peptide. Data represent the mean  $\pm$  standard deviation,  $n=4$ . Curves were fit to a competitive inhibition model in PRISM 9. The  $K_{iapp}$  is the average  $\pm$  standard deviation obtained for the fits from four independent experiments. These data were replotted to obtain the Lineweaver-Burk plots in **Figure 3d**.

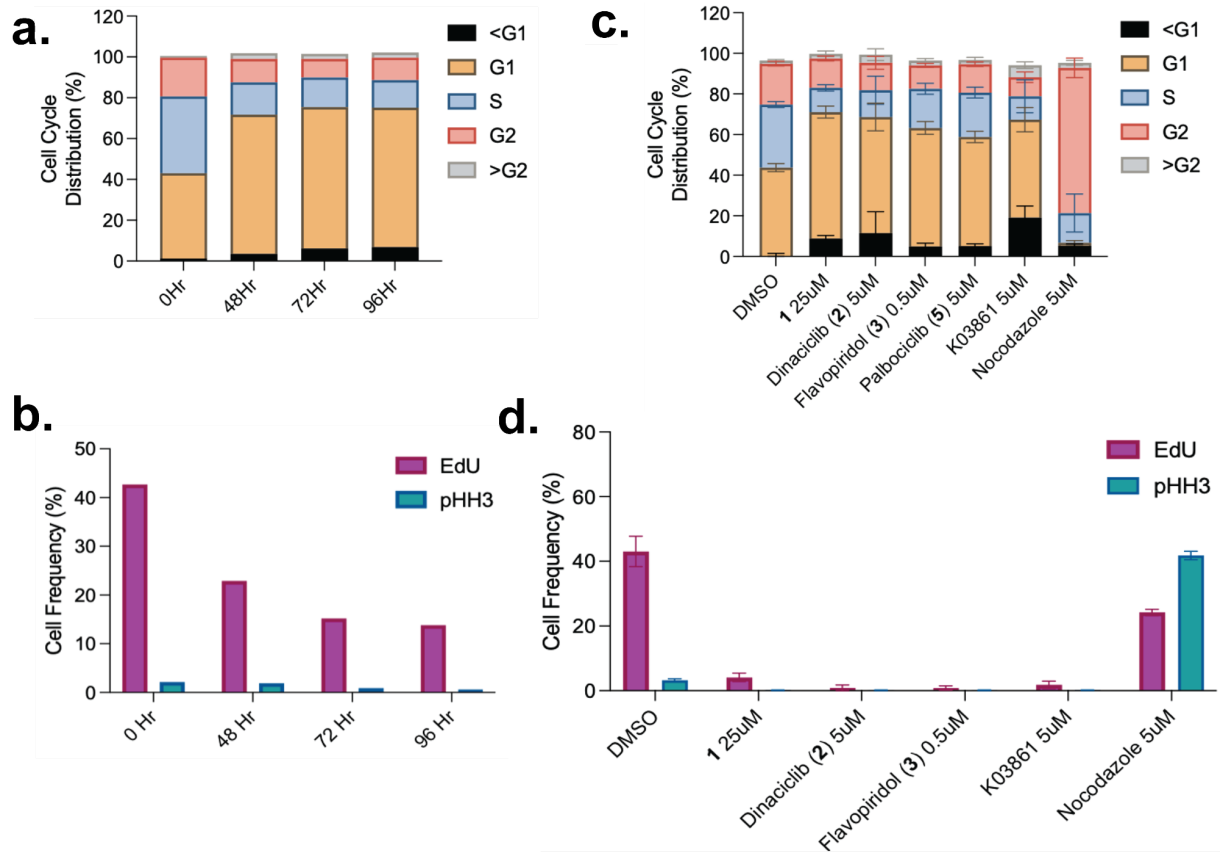

**Figure S7. Cell Cycle arrest by serum starvation and cell cycle inhibitors. a)** Cell cycle distribution after 48, 72, and 96 hours of serum starvation. **b)** EdU and pHH3 incorporation measured by flow cytometry after 48, 72, and 96 hours of serum starvation. **c)** Cell cycle distribution after 96 hours of serum starvation and 24-hour treatment with cell cycle inhibitory compounds. **d)** EdU incorporation and pHH3 levels measured by flow cytometry after 96 hours of serum starvation and 24-hour treatment with cell cycle inhibitory compounds.

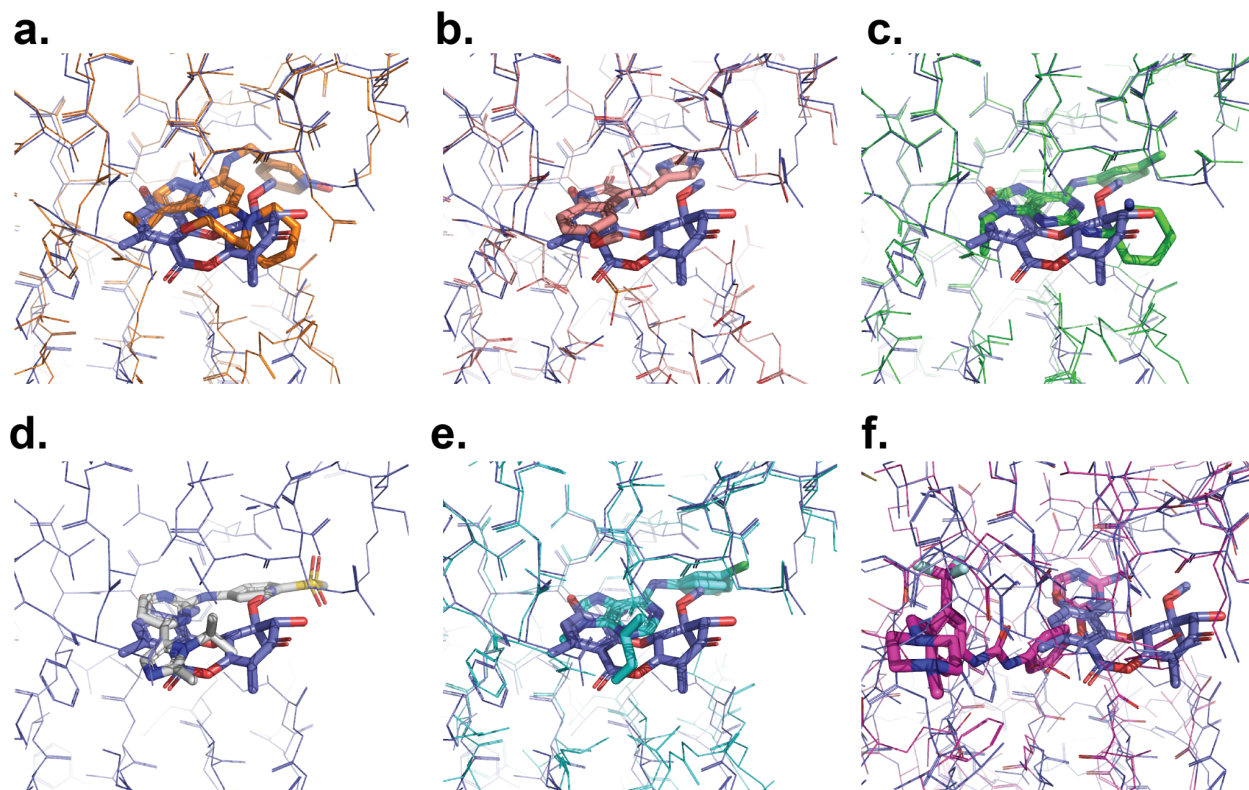

**Figure S8. Structural comparison of 1 bound to CDK2 and other CDK2 inhibitors.** Overlays of 1-bound (Blue; PDB: 8OY2) and (a) dinaciclib-bound (orange; PDB: 4KD1), (b) SU9516-bound (pink; PDB: 3PY0); (c) CGP74514A-bound (green; PDB: 6GUK), (d) AZA-5438-bound (gray; PDB: 6GUH), (e) purvalanol B-bound (cyan; 1CKP), and (f) K03861-bound (pink; PDB: 5A14). Structural alignments were made using TM-align. [\(Zhang and Skolnick 2005\)](#).



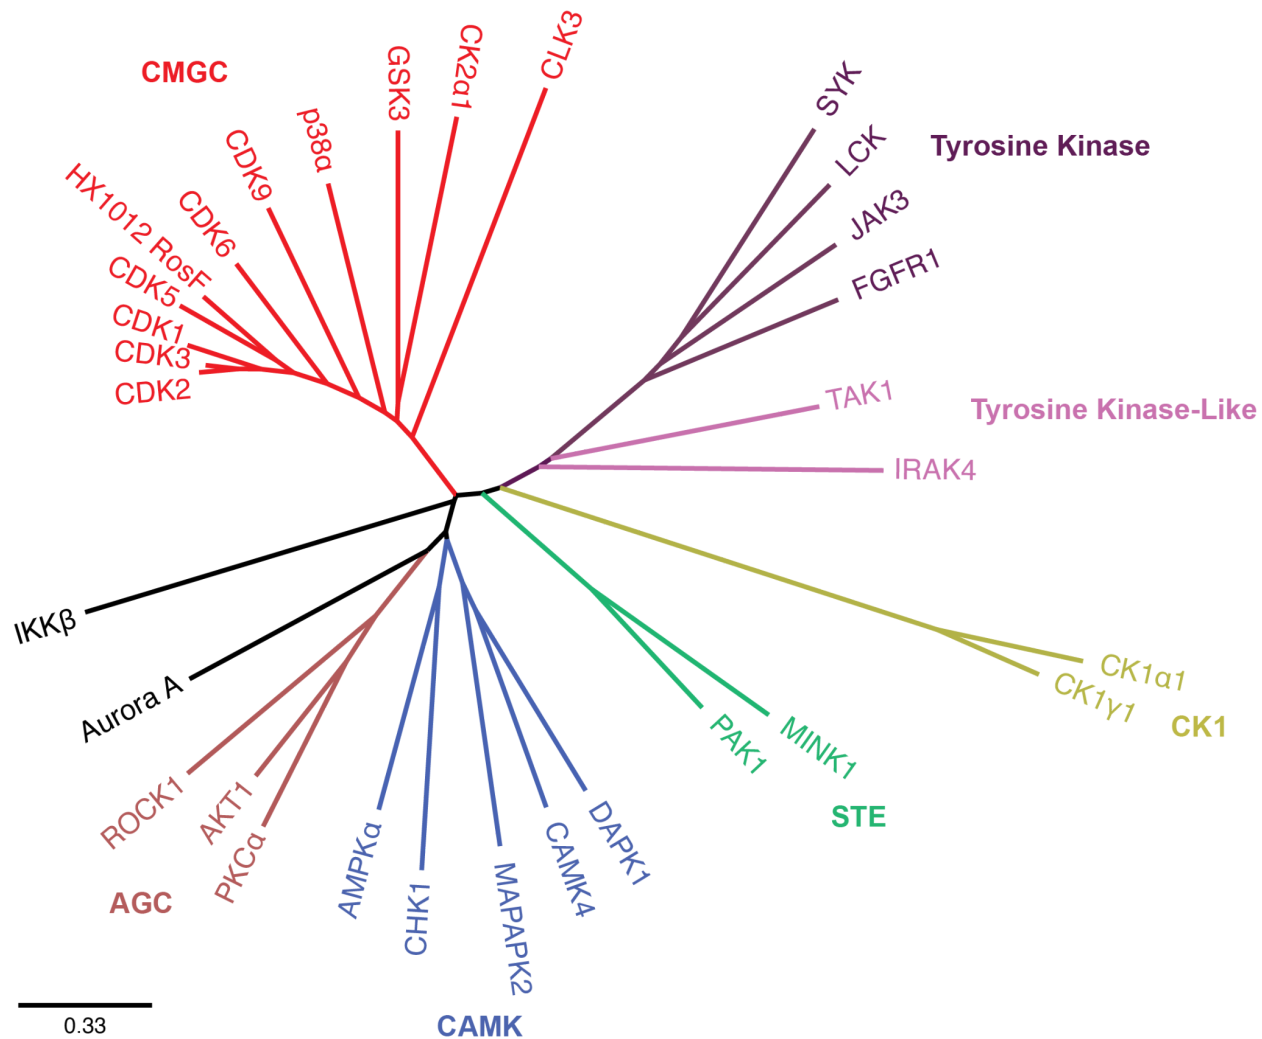

**Figure S9. Phylogeny of kinases profiled in the selectivity panel.**

Neighbor-joining phylogenetic tree of *A. uvarum* RosF and enzymes profiled in the kinase selectivity panel with 1000 bootstrap values. Branches are colored according to the kinase subfamily to which the kinase belongs.

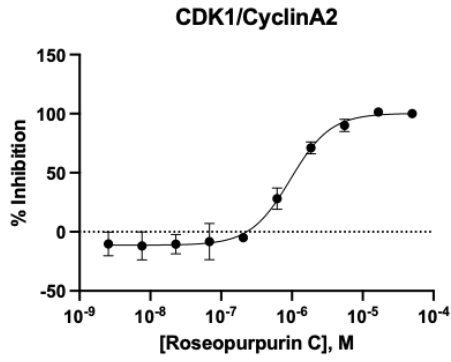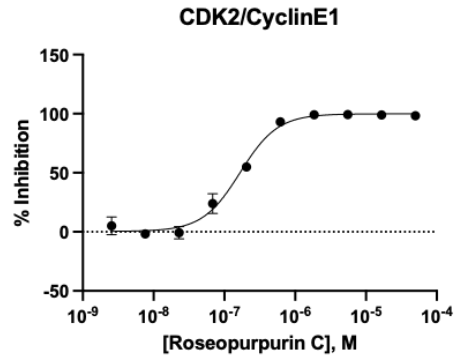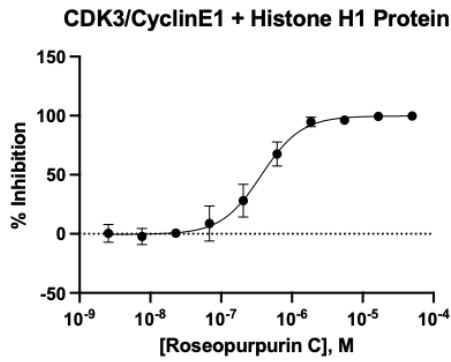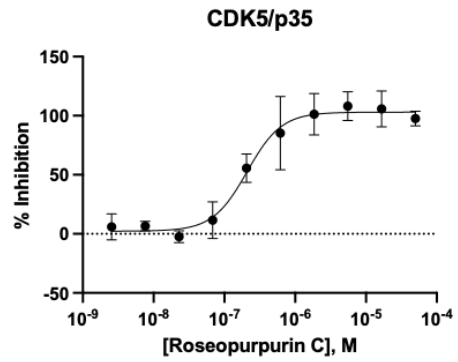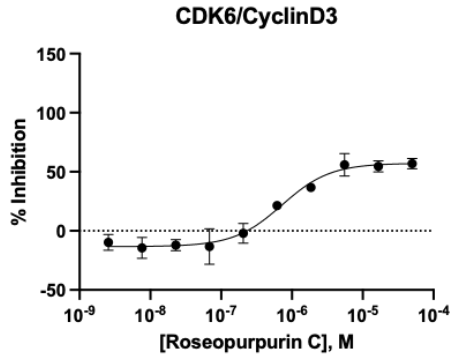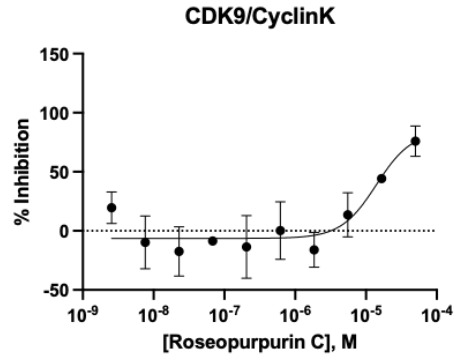

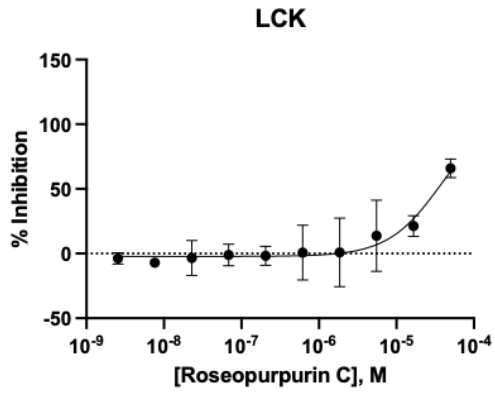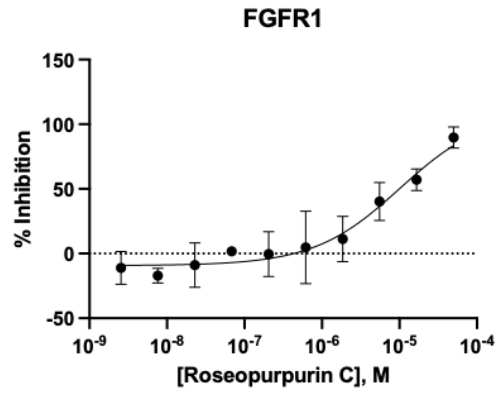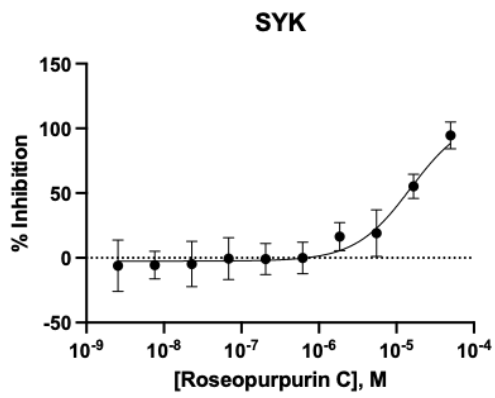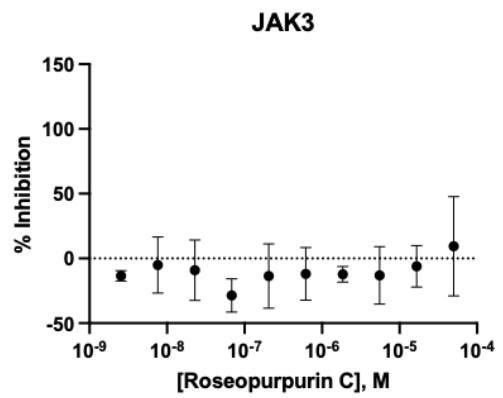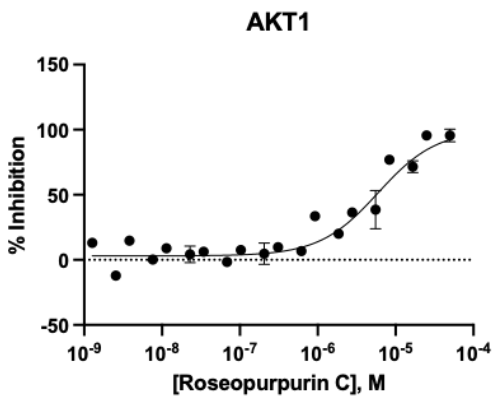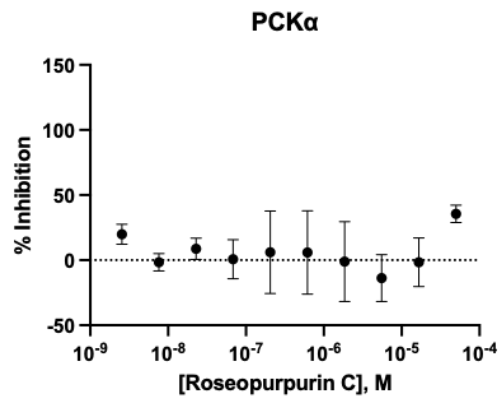

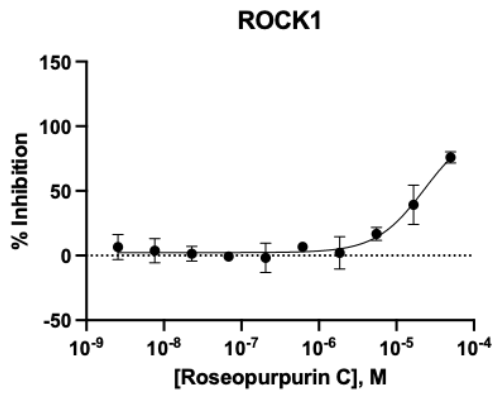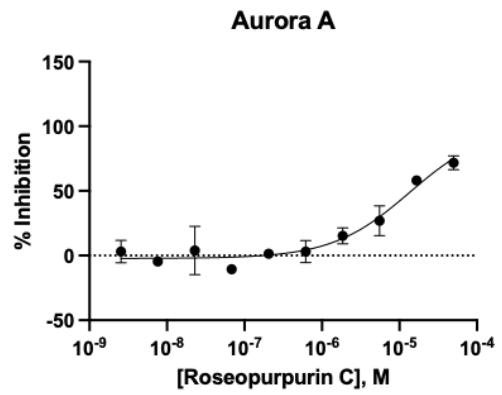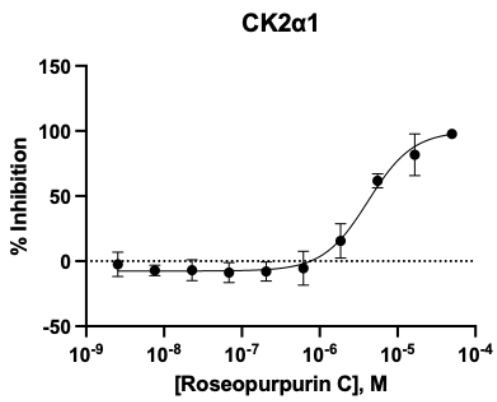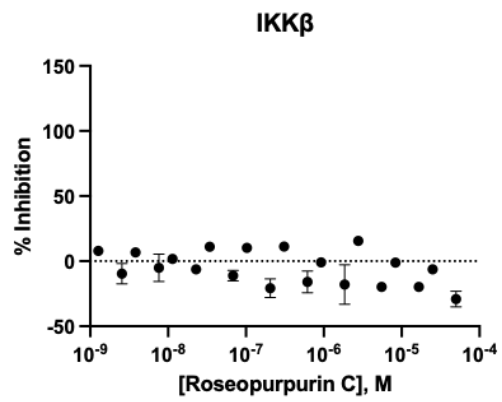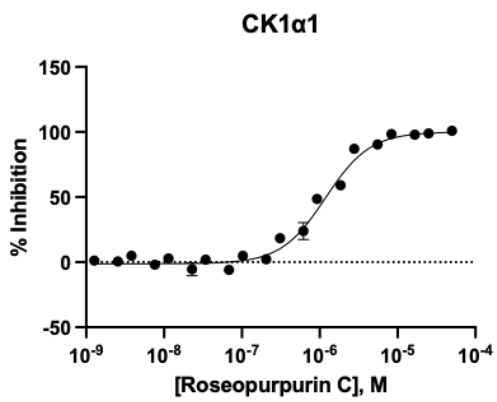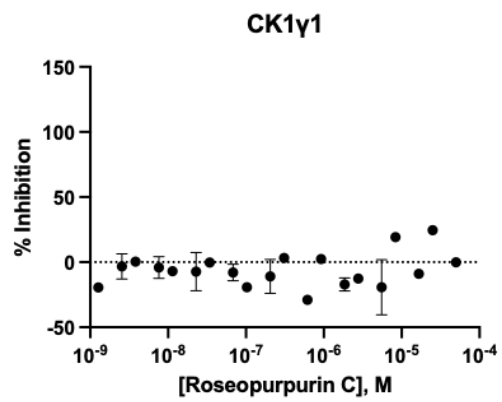

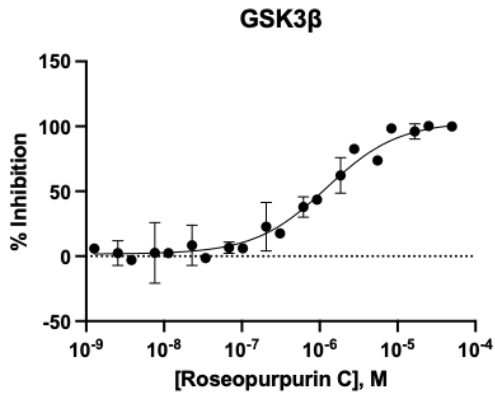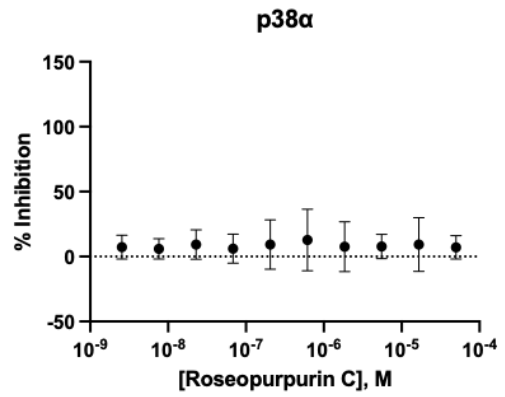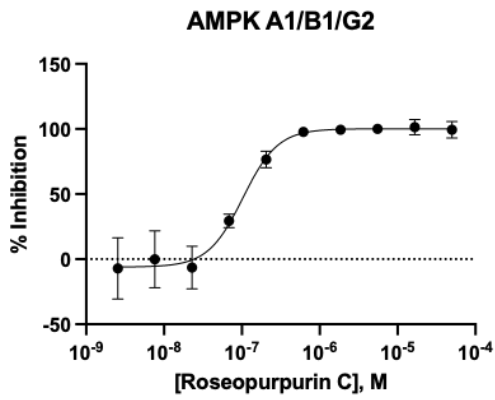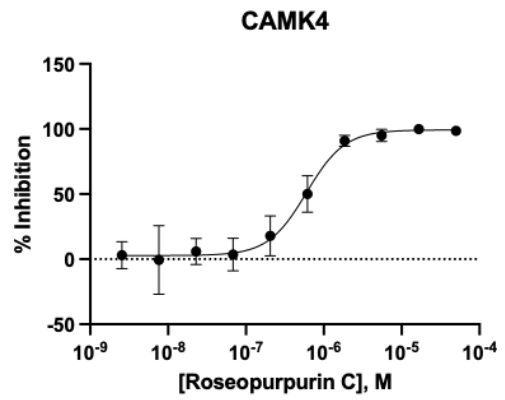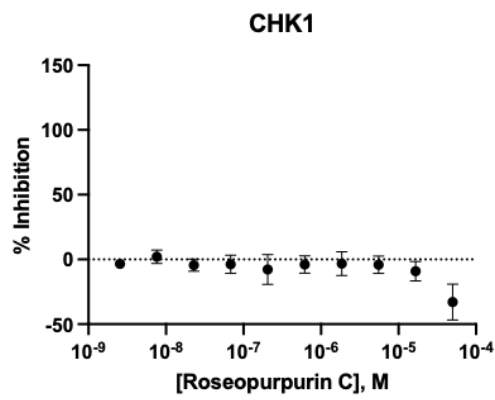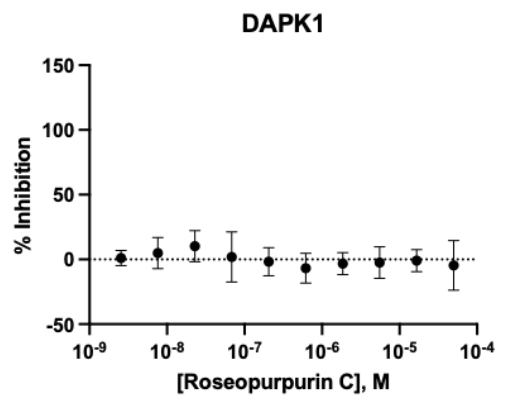

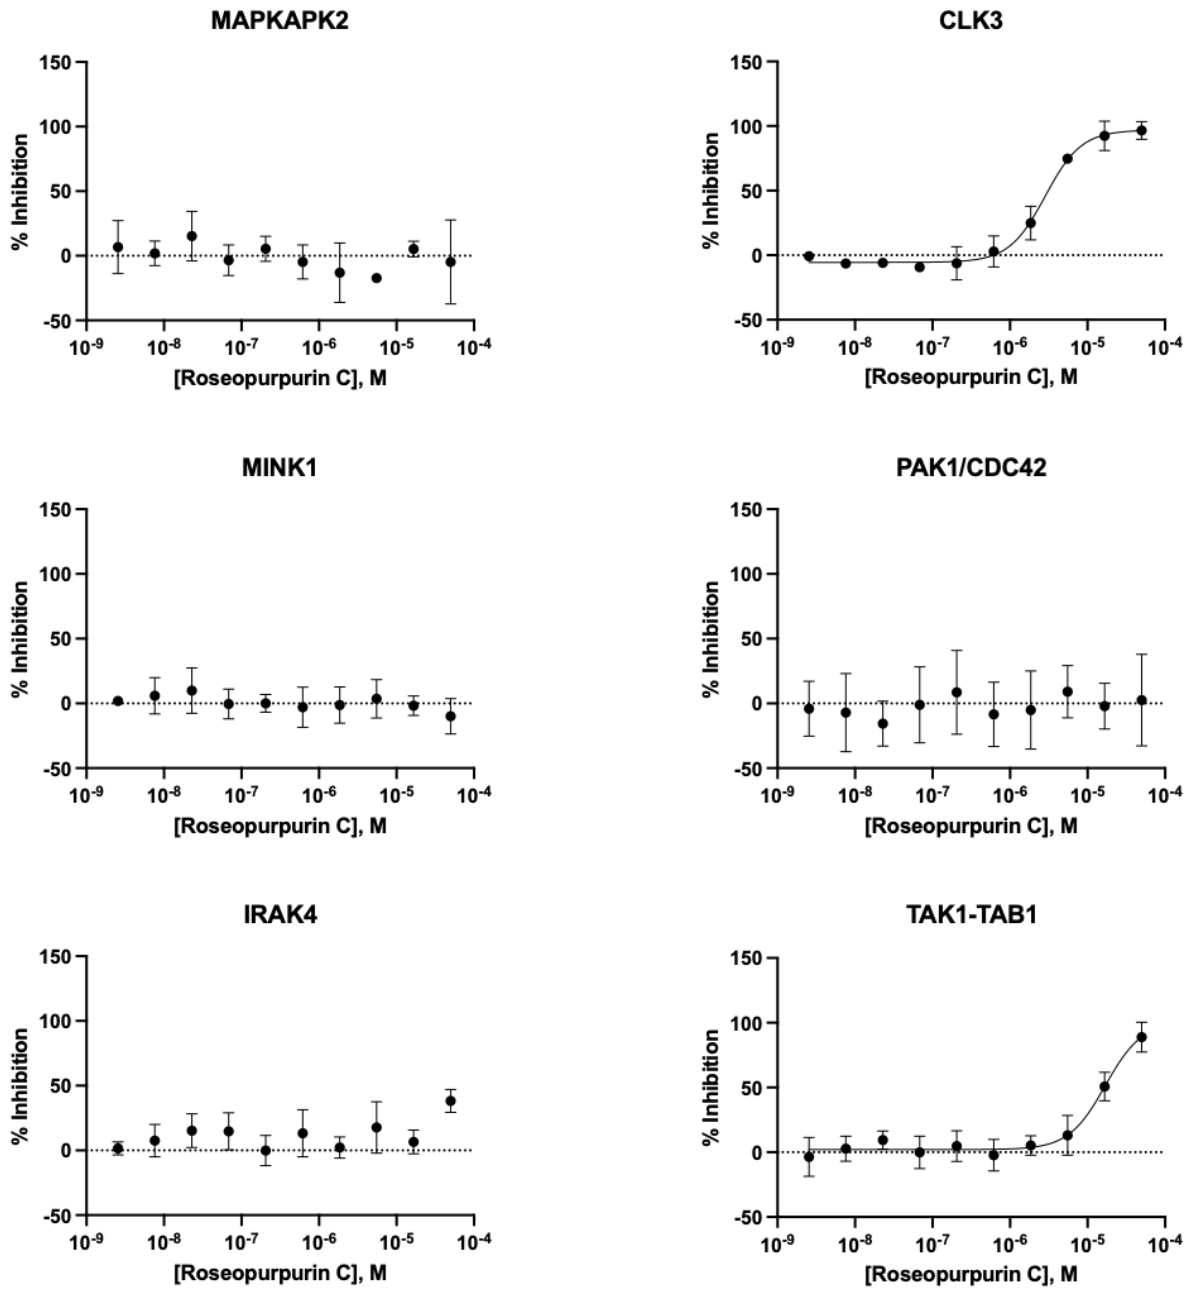

**Figure S10. Roseopurpurin C (1) kinase selectivity profile.**

Data represents the averages  $\pm$  standard deviation;  $n=3$ .  $IC_{50}$  values were determined using PRISM 9 and a 4-parameter curve fit.  $IC_{50}$  values are reported in Table 1.

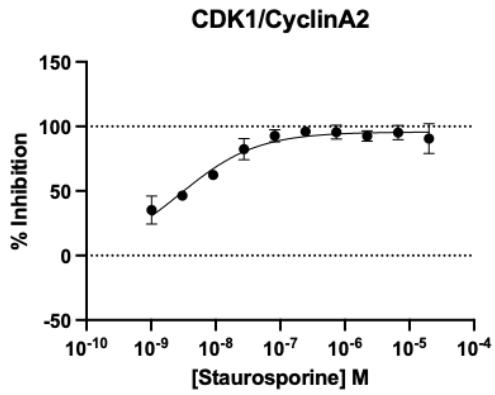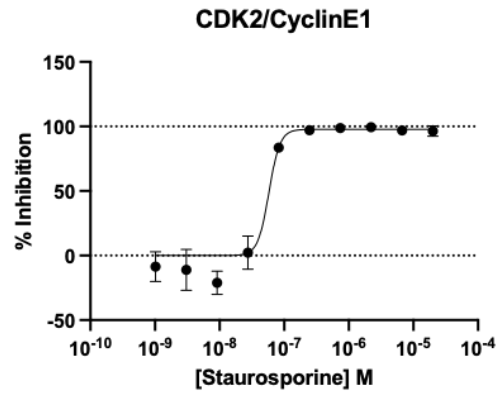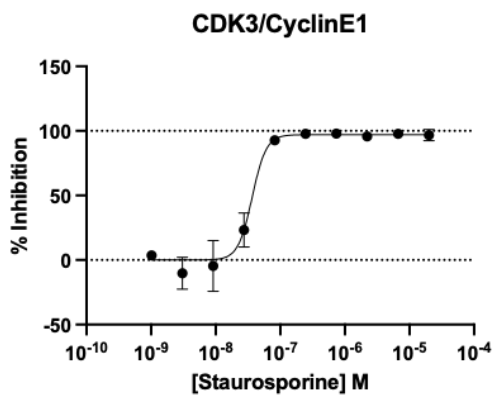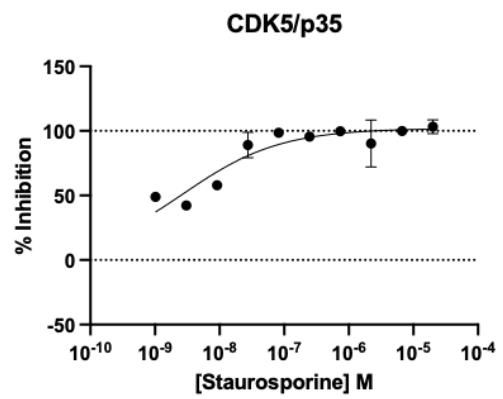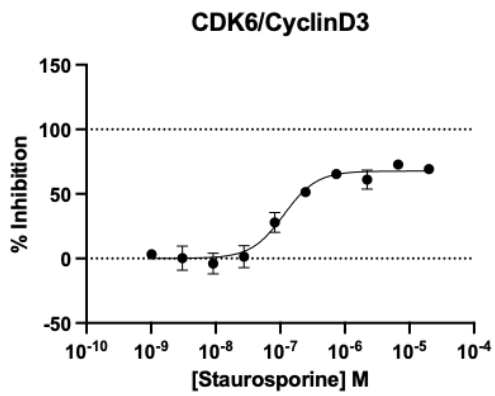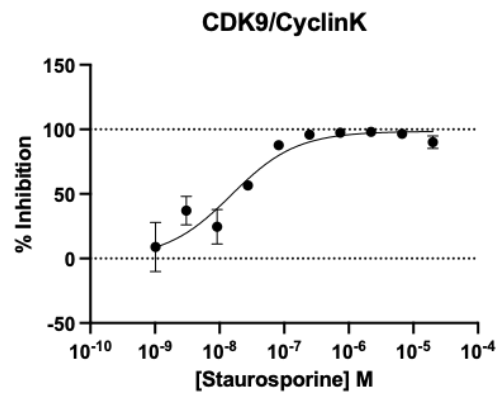

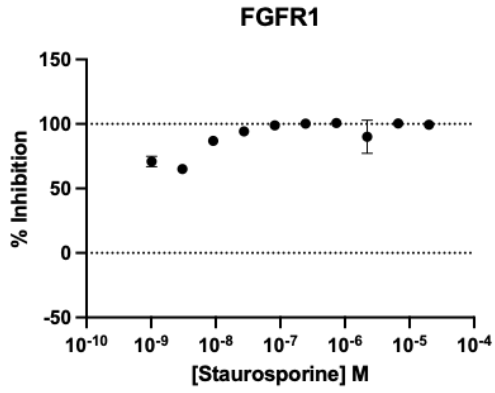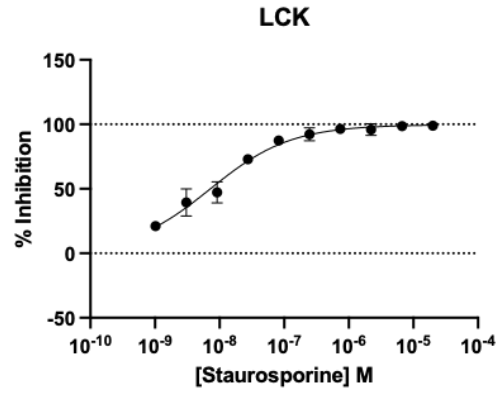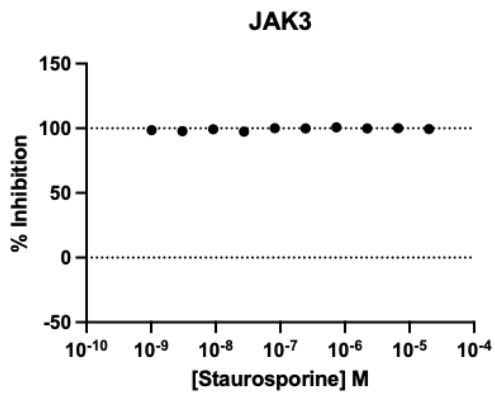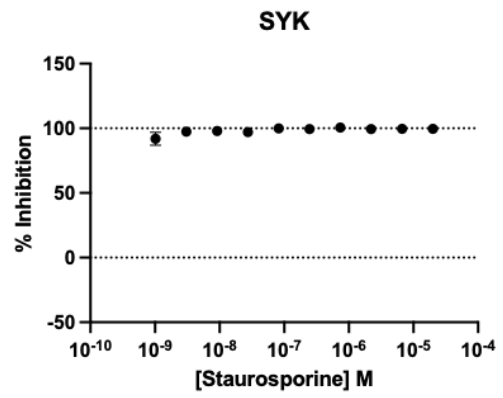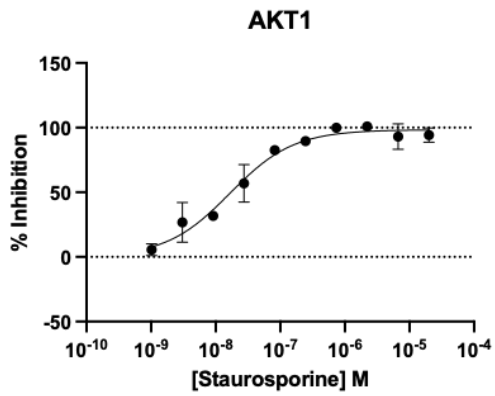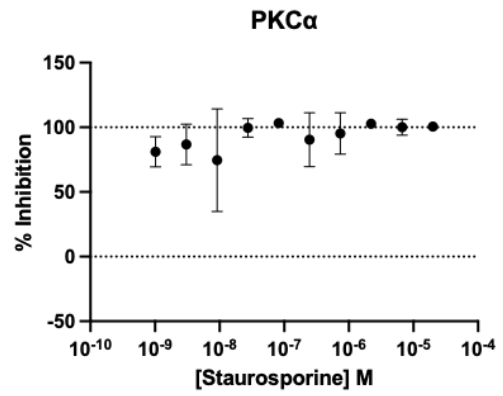



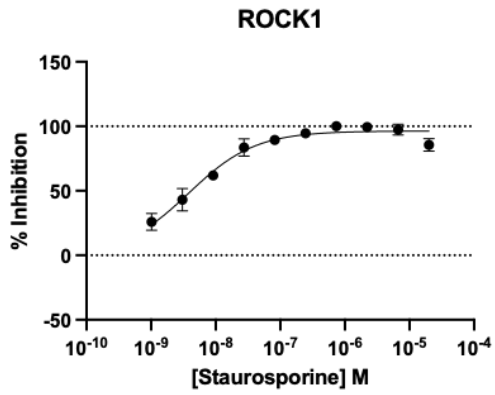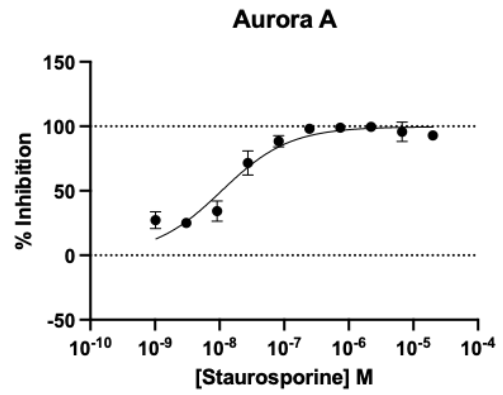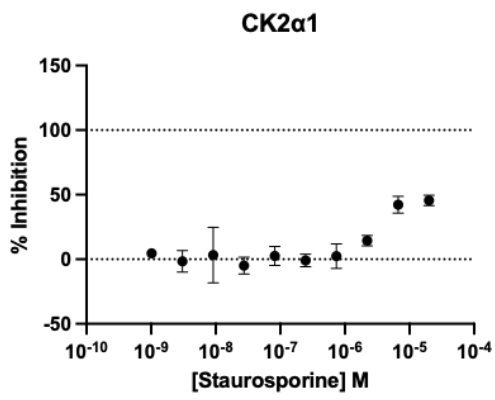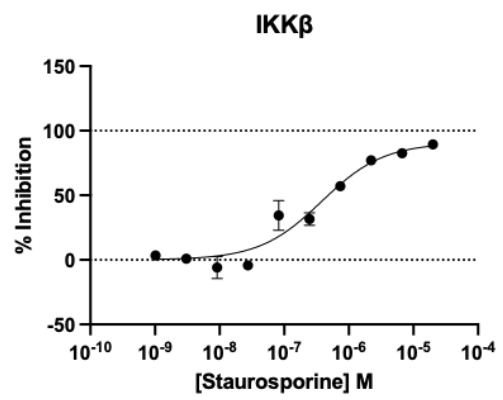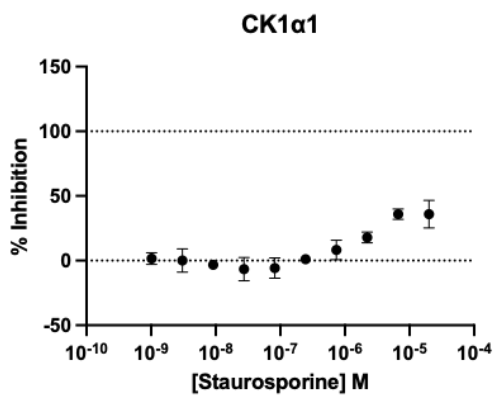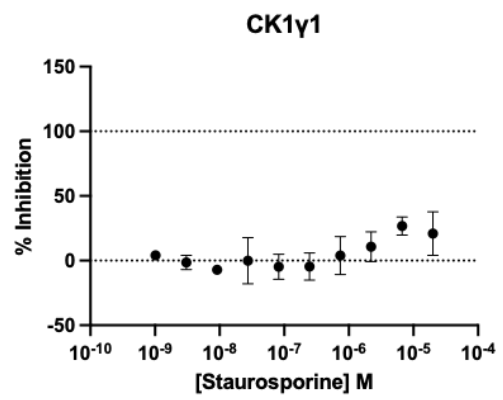

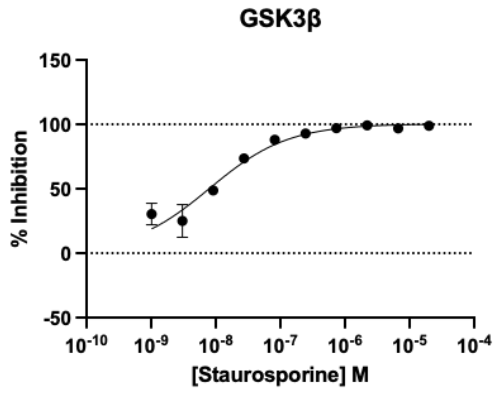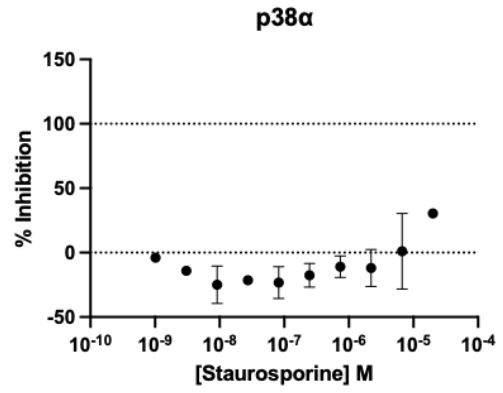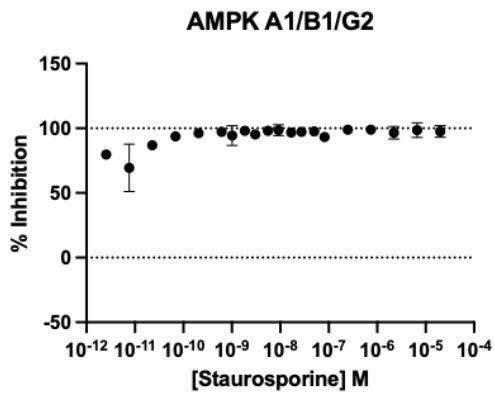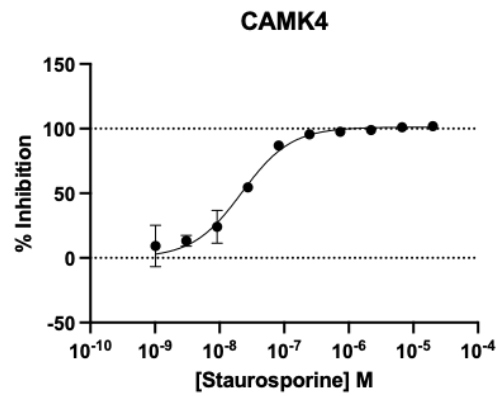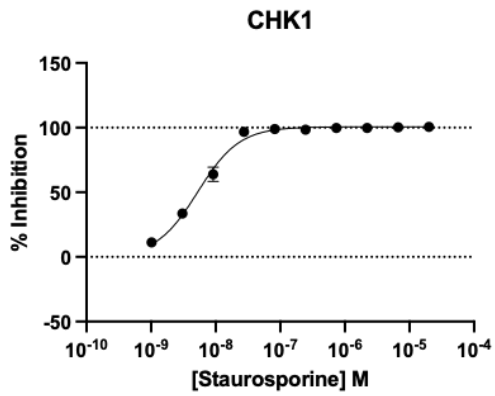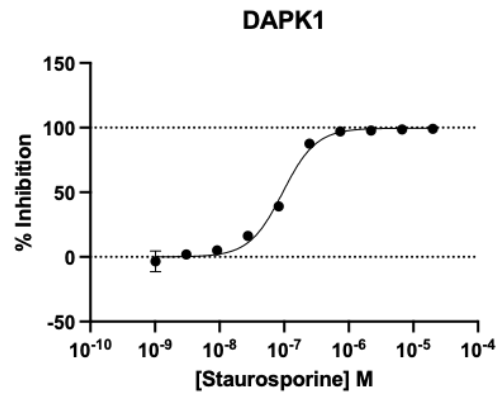

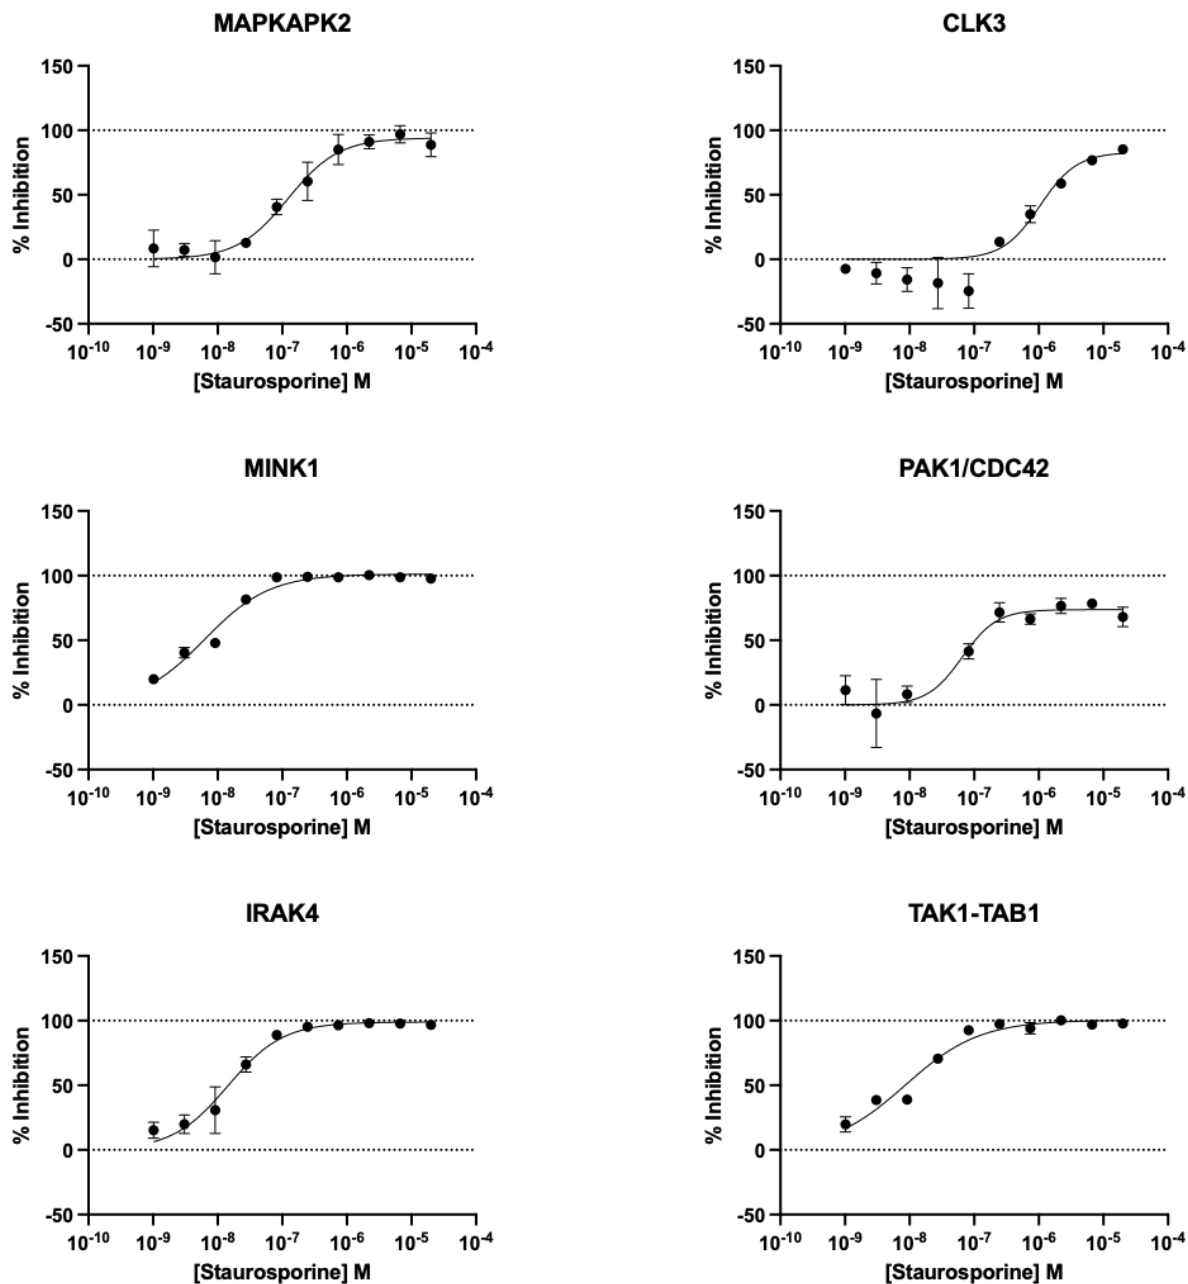

**Figure S11. Staurosporine kinase selectivity profile.**

Data represents the averages  $\pm$  standard deviation;  $n=3$ . IC<sub>50</sub> values were determined using PRISM 9 and a 4-parameter curve fit. IC<sub>50</sub> values are reported in Table 1.



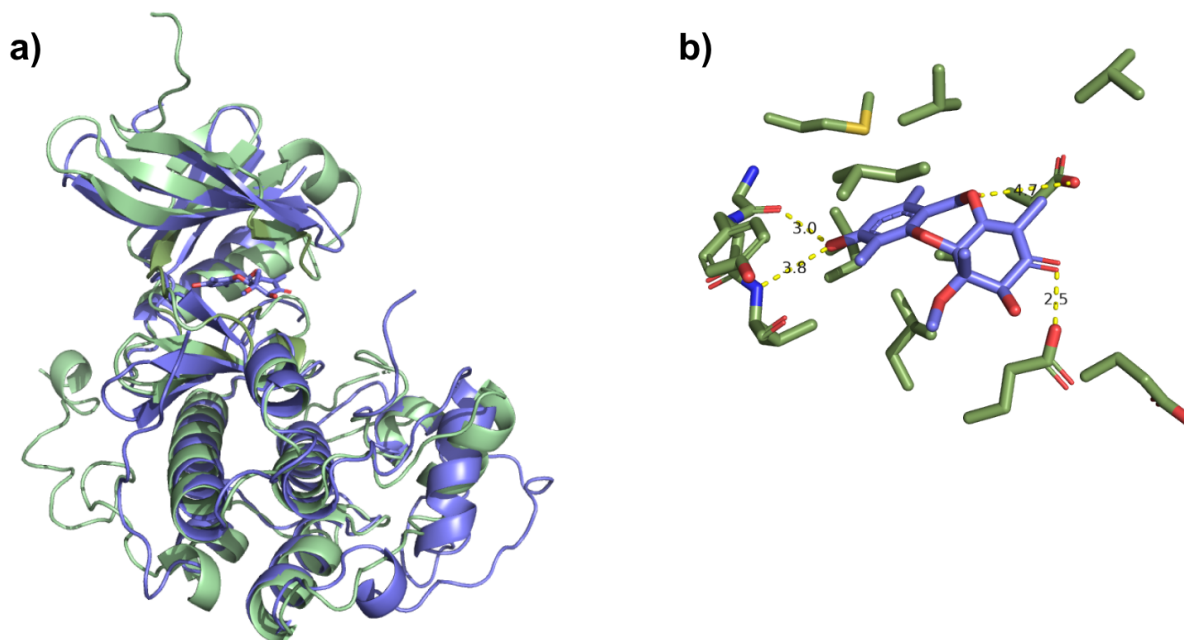

**Figure S13. Structural alignment of AMPK $\alpha$ 1 and 1-bound CDK2.**

**a)** Structural alignment of 1-bound CDK2 (blue) and AMPK $\alpha$ 1 (green; PDB 4CFF). **b)** Zoom in on the ATP-binding pocket of AMPK $\alpha$ 1 with residues predicted to bind **1** based on the structural alignment are displayed. Although AMPK $\alpha$ 1 harbors a Asp89Gly mutation (CDK2 numbering), the downstream Glu (Glu100 in AMPK $\alpha$ 1) is appropriately positioned to form a H-bond with the 4-OH of **1**.

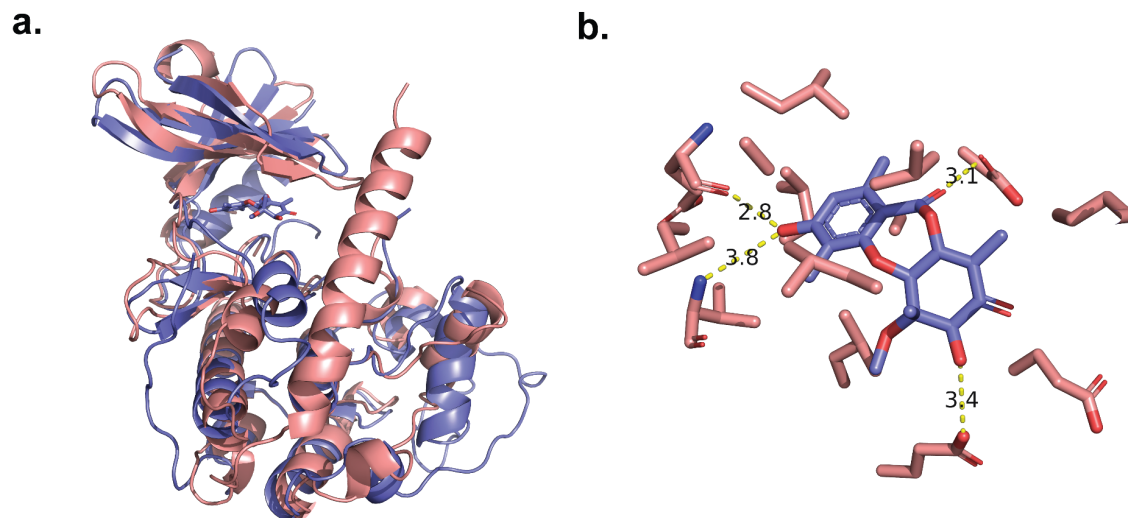

**Figure S14. Structural alignment of CAMK4 and 1-bound CDK2.**

**a)** Structural alignment of 1-bound CDK2 (blue) and CAMK4 (pink; PDB 2W4O). **b)** Zoom in on the ATP-binding pocket of CAMK4 with residues predicted to bind **1** based on the structural alignment are displayed. Although CAMK4 harbors a Asp89Gly mutation (CDK2 numbering), the downstream Glu (Glu125 in CAMK4) is appropriately positioned to form a H-bond with the 4-OH of **1**.

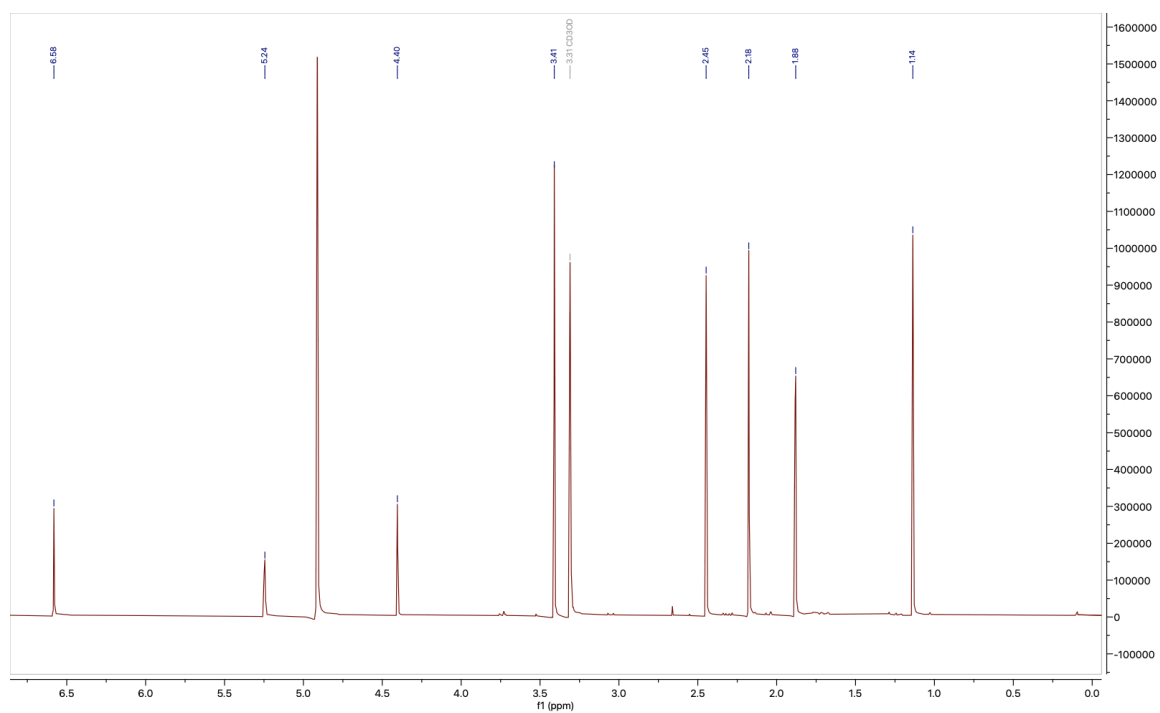

Figure S15. The  $^1\text{H}$  NMR spectrum of 1 in  $\text{CD}_3\text{OD}$  (600 MHz)

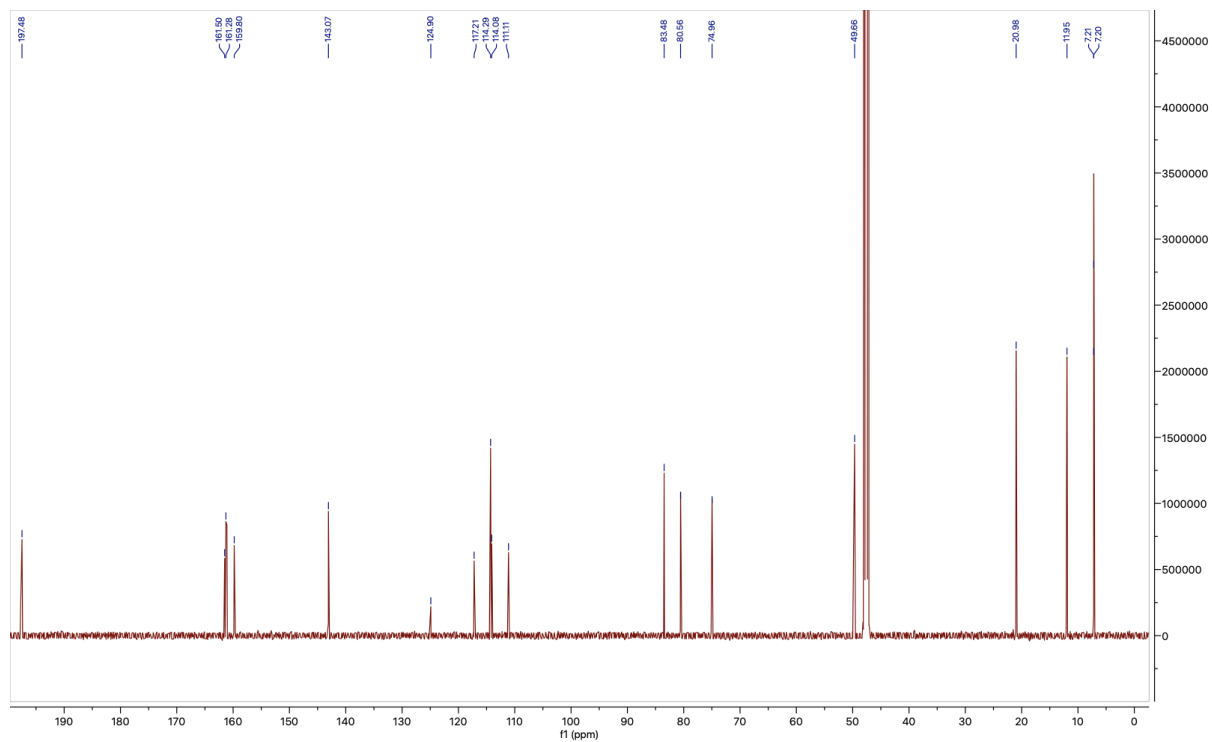

Figure S16. The  $^{13}\text{C}$  NMR spectrum of 1 in  $\text{CD}_3\text{OD}$  (150 MHz)

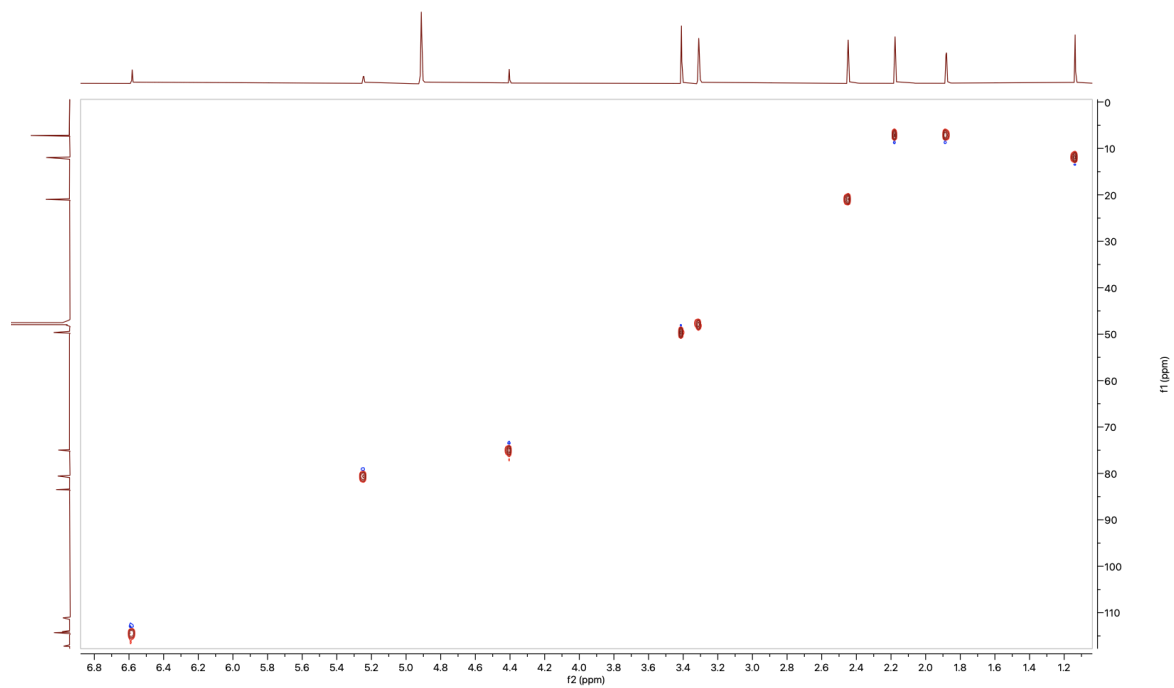

Figure S17. The  $^1\text{H}$ - $^{13}\text{C}$  HSQC NMR spectrum of **1** in  $\text{CD}_3\text{OD}$  (600 MHz)

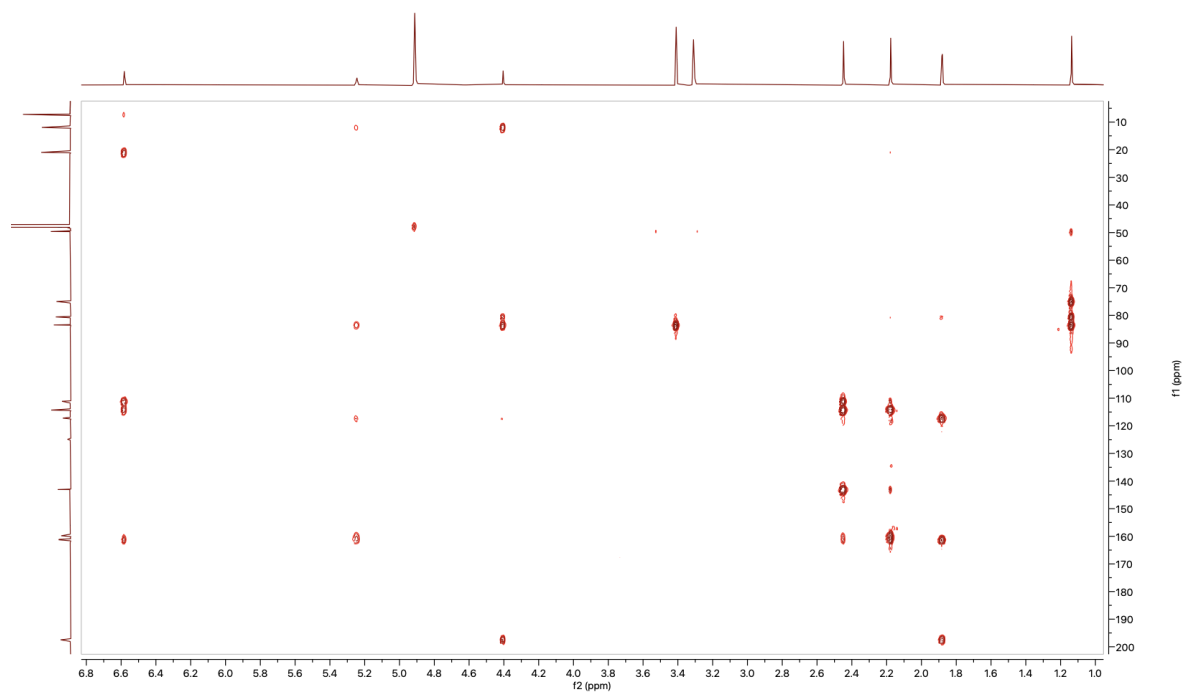

Figure S18. The  $^1\text{H}$ - $^{13}\text{C}$  HMBC NMR spectrum of **1** in  $\text{CD}_3\text{OD}$  (600 MHz)



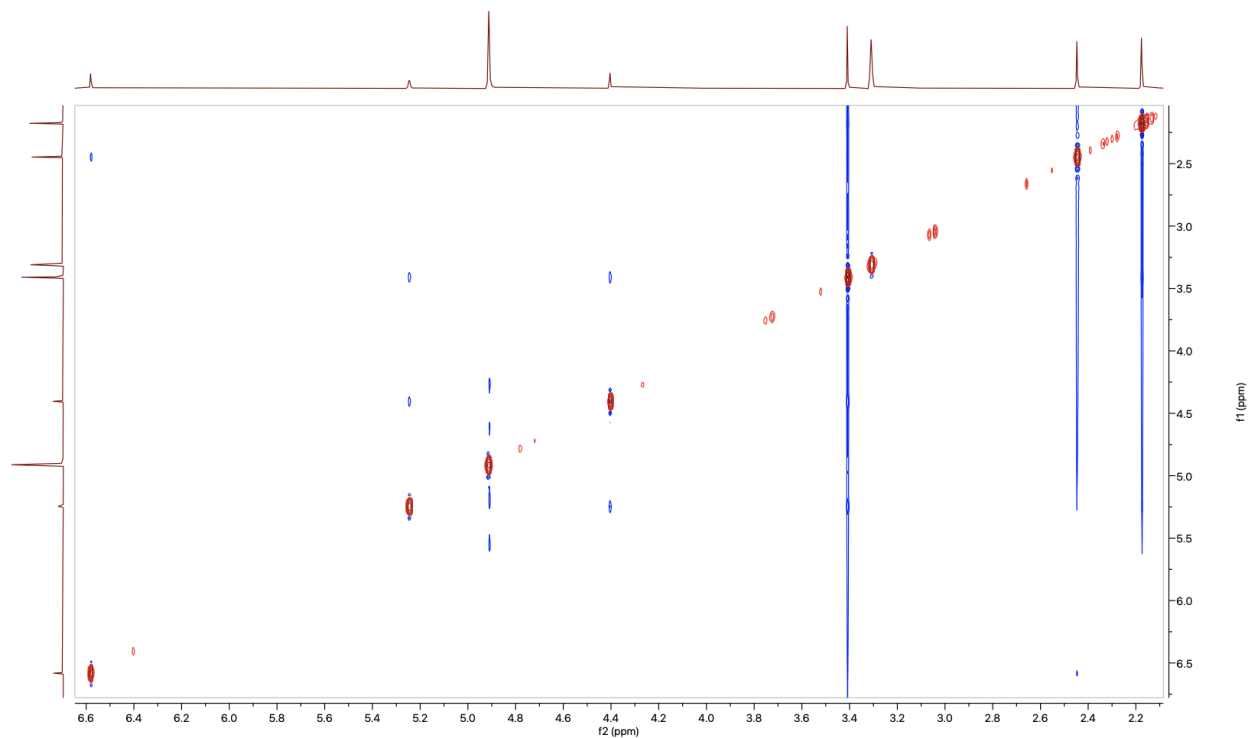

Figure S19. The  $^1\text{H}$ - $^1\text{H}$  NOESY NMR spectrum of **1** in  $\text{CD}_3\text{OD}$  (600 MHz)

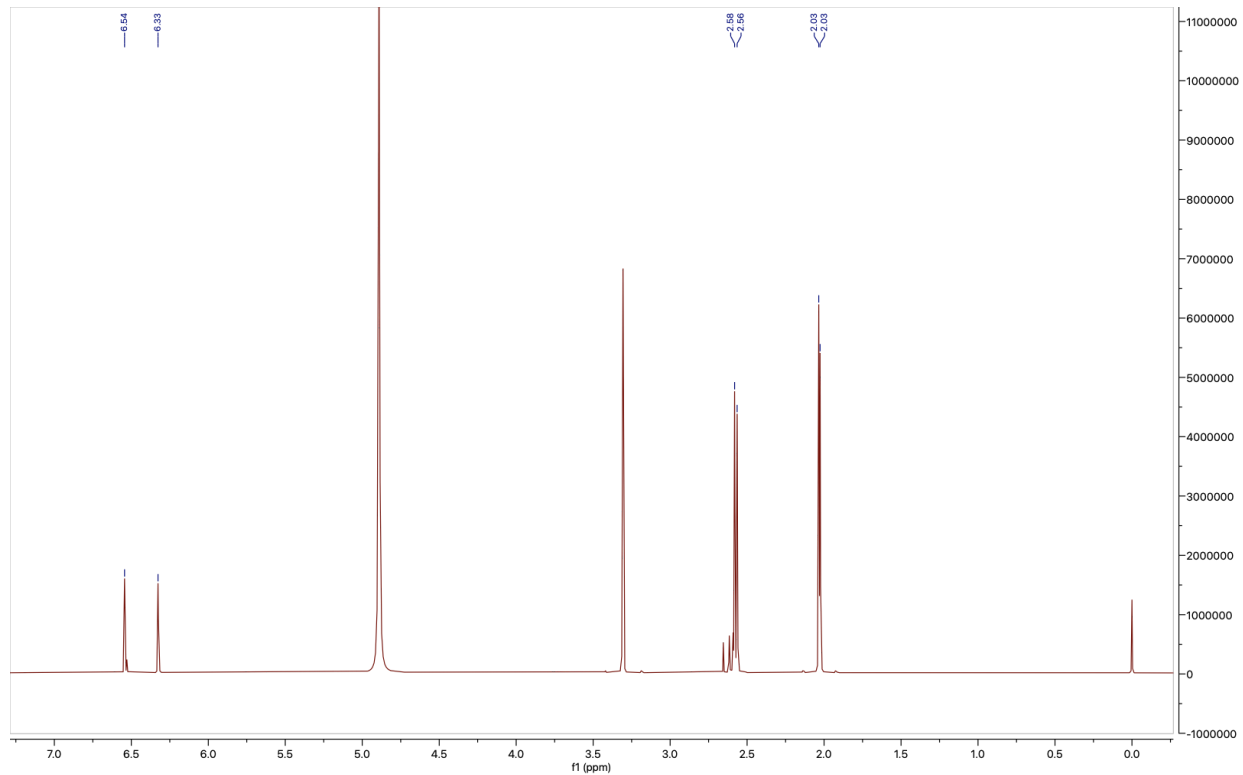

Figure S20. The  $^1\text{H}$  NMR spectrum of **6** in  $\text{CD}_3\text{OD}$  (600 MHz)

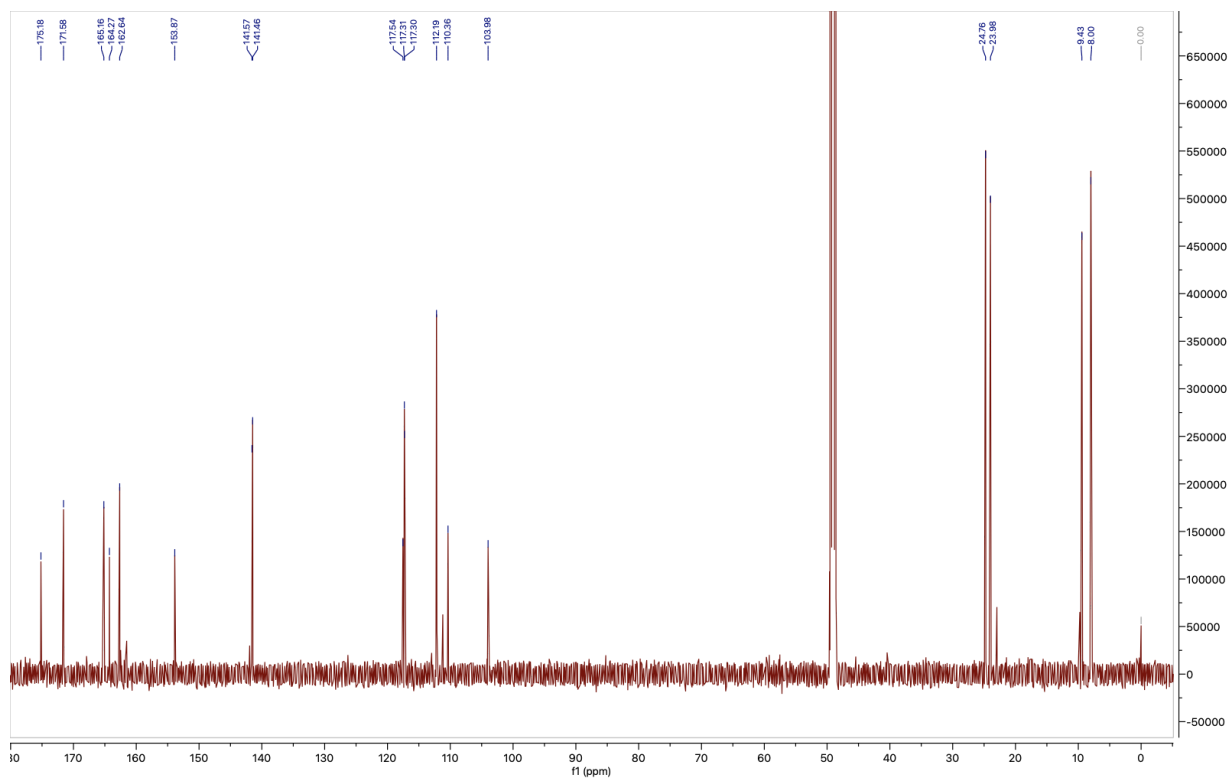

Figure S21. The  $^{13}\text{C}$  NMR spectrum of 6 in  $\text{CD}_3\text{OD}$  (150 MHz)

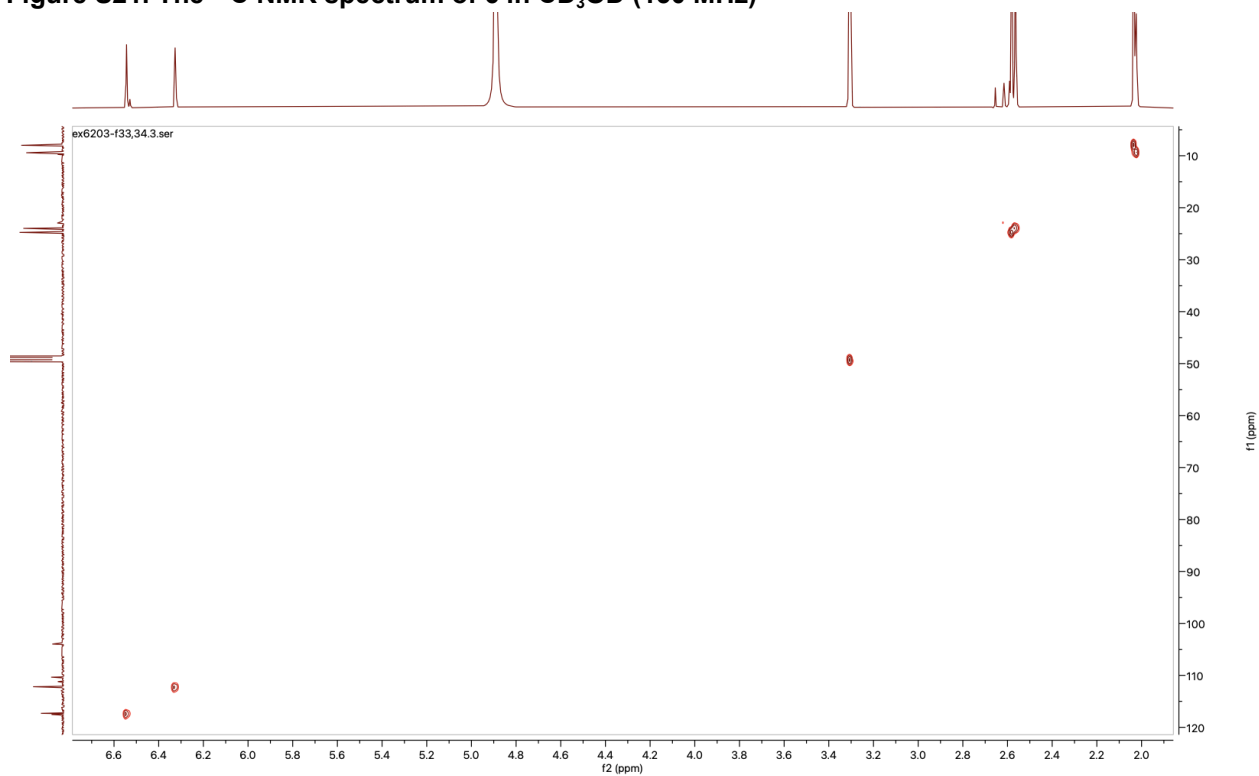

Figure S22. The  $^1\text{H}$ - $^{13}\text{C}$  HSQC NMR spectrum of 6 in  $\text{CD}_3\text{OD}$  (600 MHz)

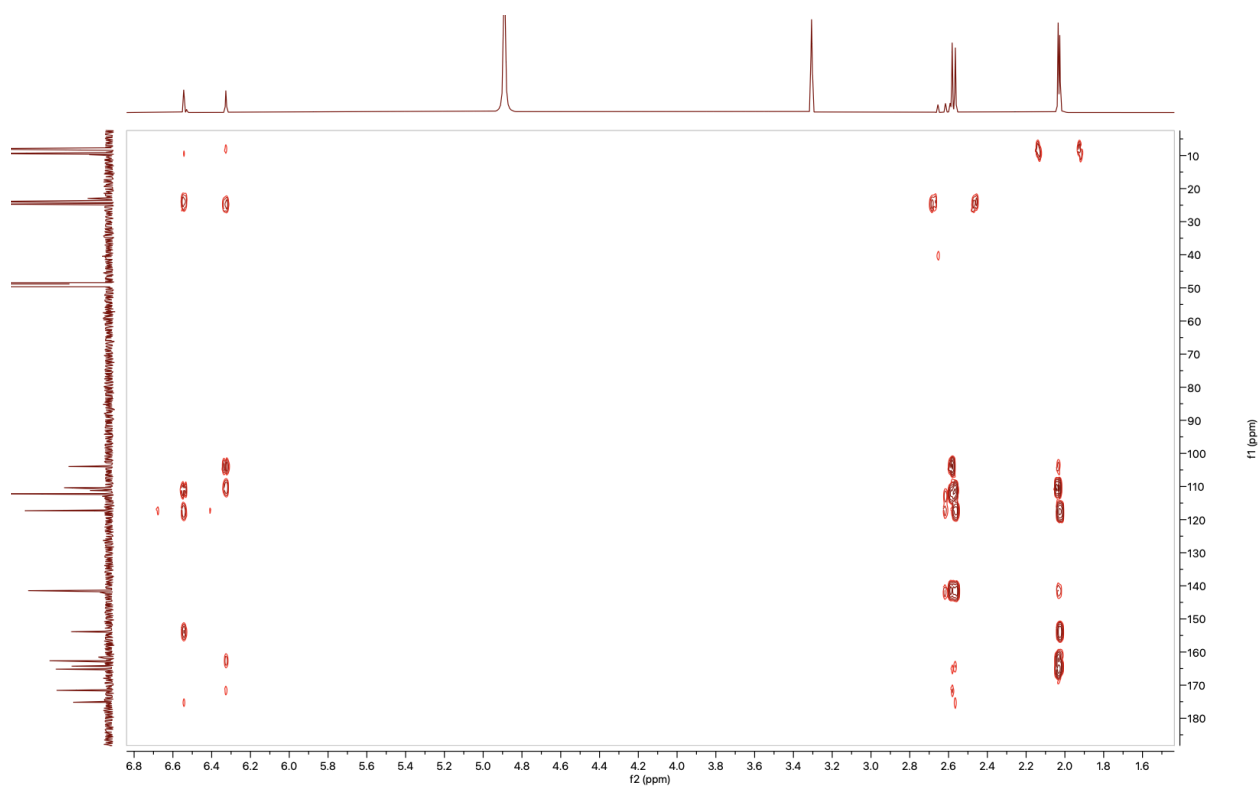

Figure S23. The  $^1\text{H}$ - $^{13}\text{C}$  HMBC NMR spectrum of **6** in  $\text{CD}_3\text{OD}$  (600 MHz)

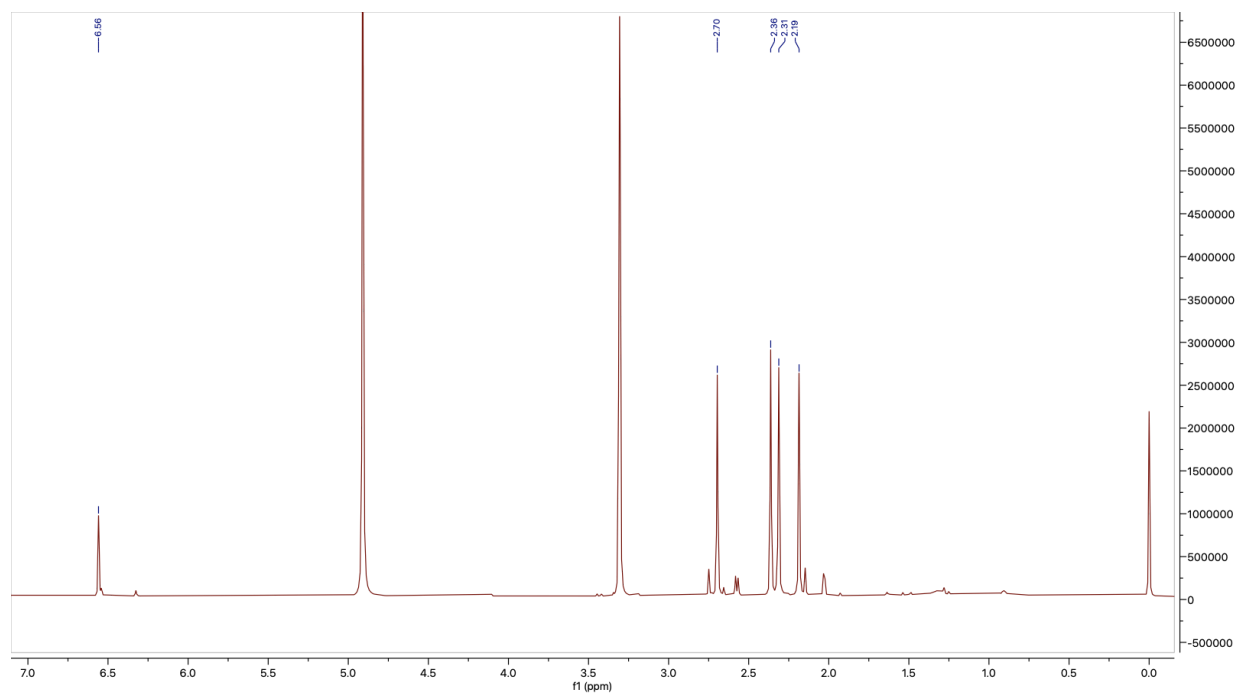

Figure S24. The  $^1\text{H}$  NMR spectrum of **7** in  $\text{CD}_3\text{OD}$  (600 MHz)

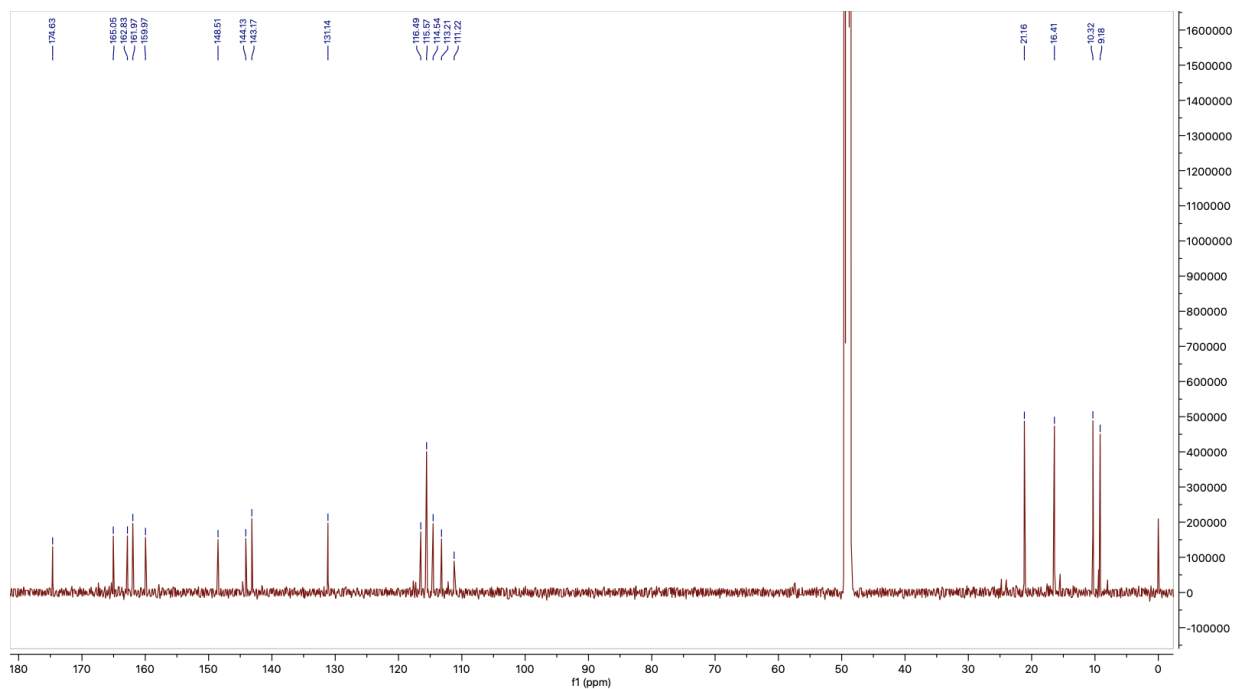

Figure S25. The  $^{13}\text{C}$  NMR spectrum of 7 in  $\text{CD}_3\text{OD}$  (150 MHz)

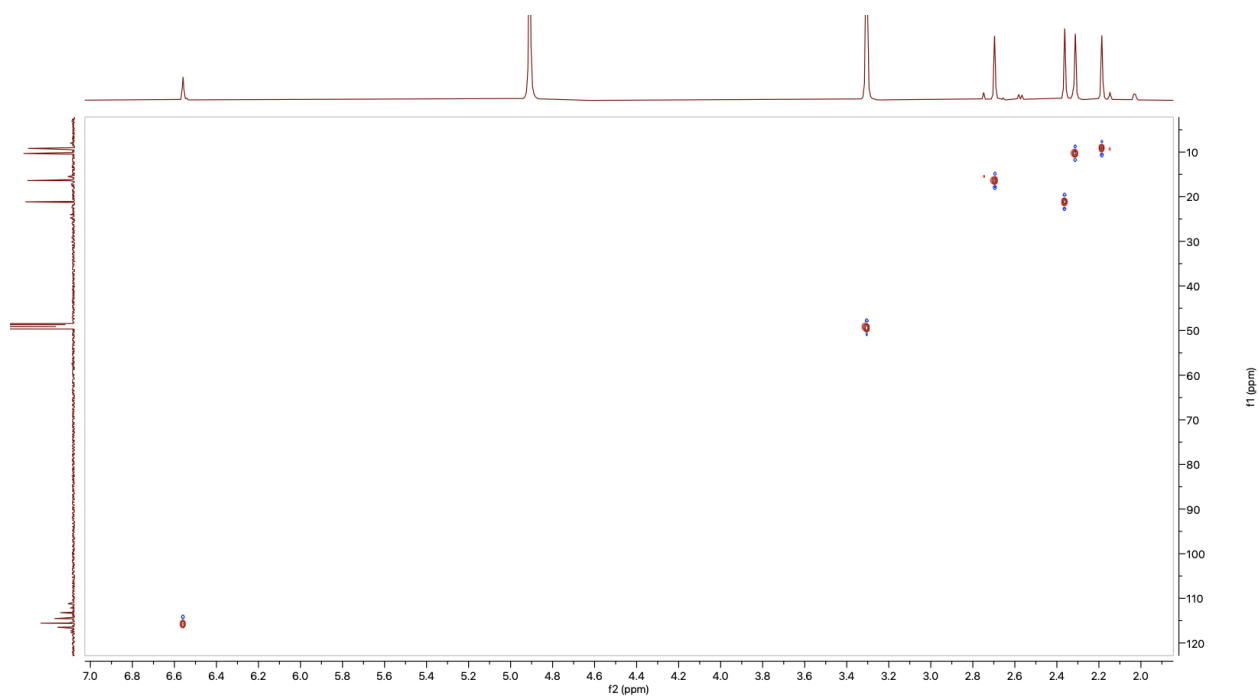

Figure S26. The  $^1\text{H}$ - $^{13}\text{C}$  HSQC NMR spectrum of 7 in  $\text{CD}_3\text{OD}$  (600 MHz)

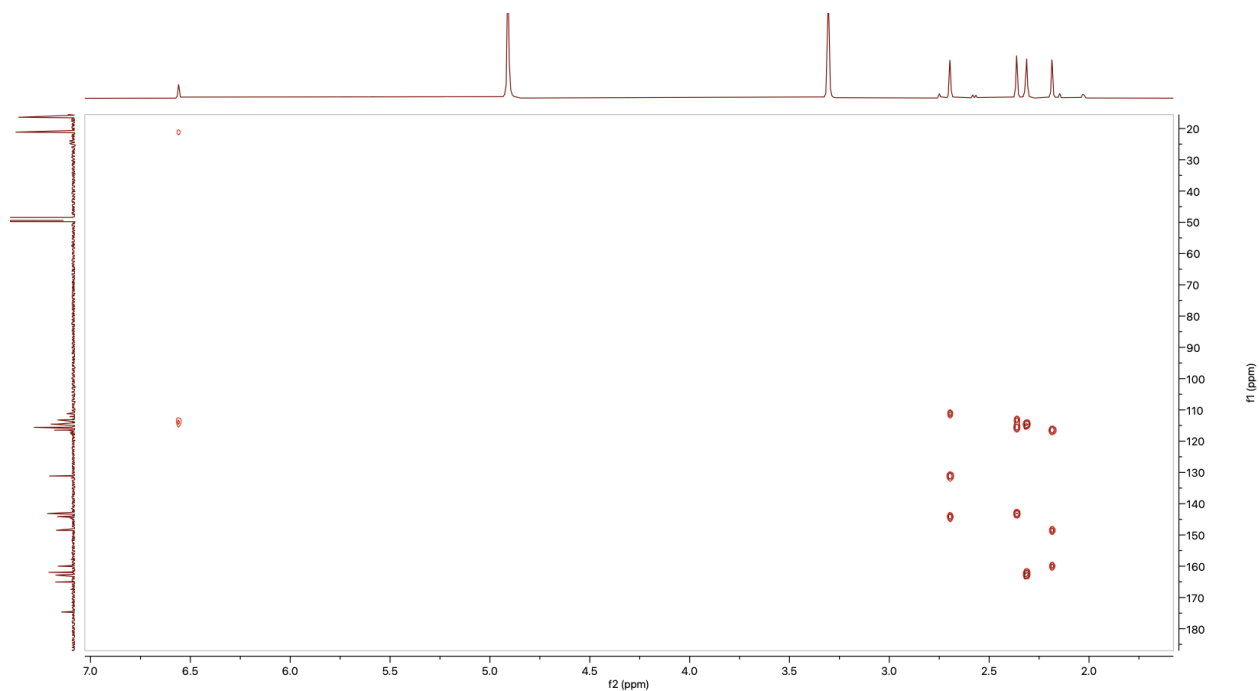

Figure S27. The  $^1\text{H}$ - $^{13}\text{C}$  HMBC NMR spectrum of 7 in  $\text{CD}_3\text{OD}$  (600 MHz)

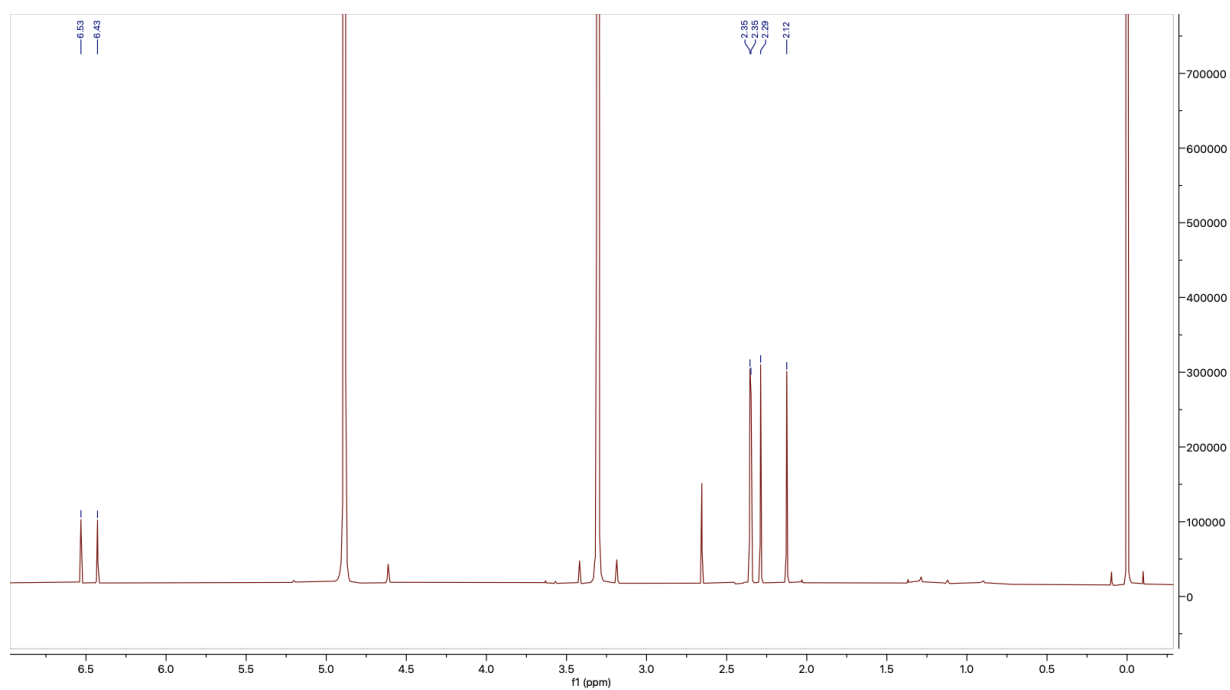

Figure S28. The  $^1\text{H}$  NMR spectrum of 8 in  $\text{CD}_3\text{OD}$  (600 MHz)

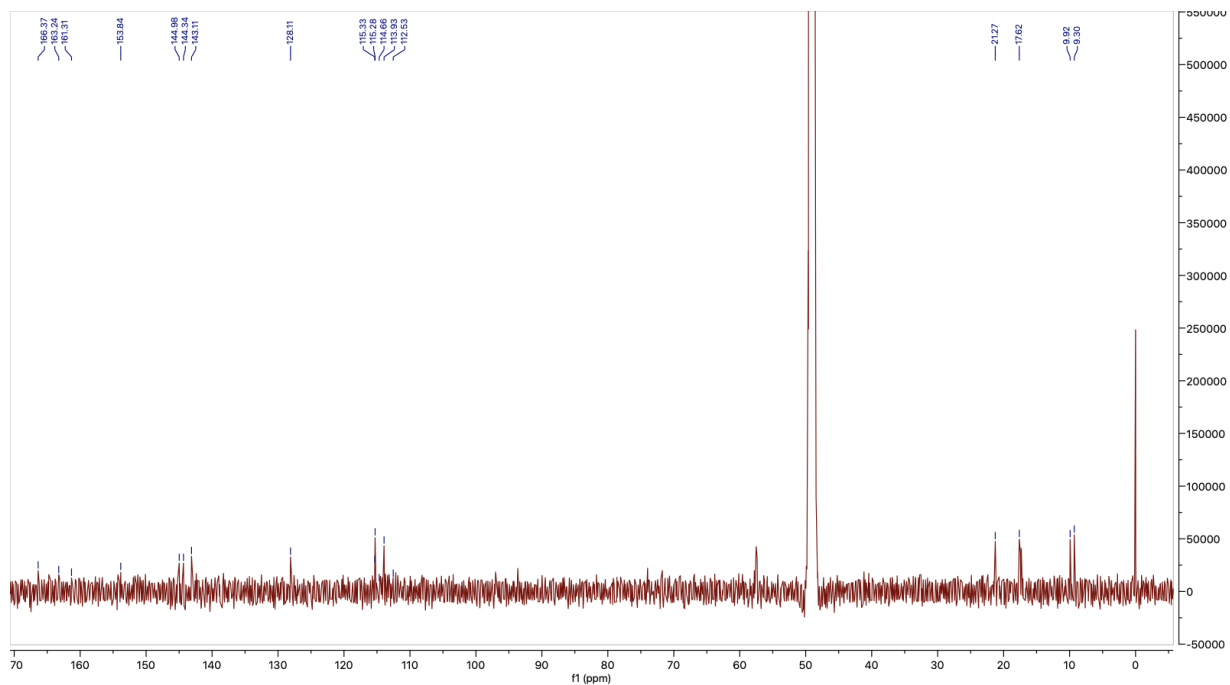

Figure S29. The  $^{13}\text{C}$  NMR spectrum of 8 in  $\text{CD}_3\text{OD}$  (150 MHz)

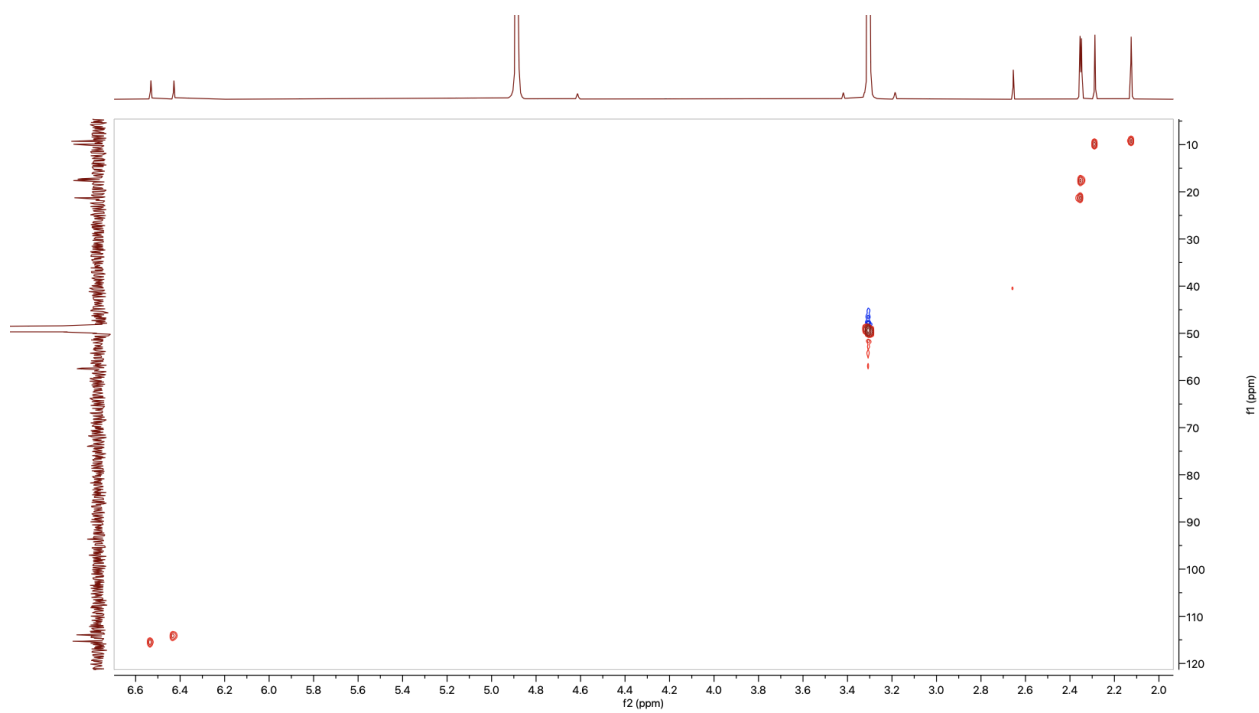

Figure S30. The  $^1\text{H}$ - $^{13}\text{C}$  HSQC NMR spectrum of 8 in  $\text{CD}_3\text{OD}$  (600 MHz)

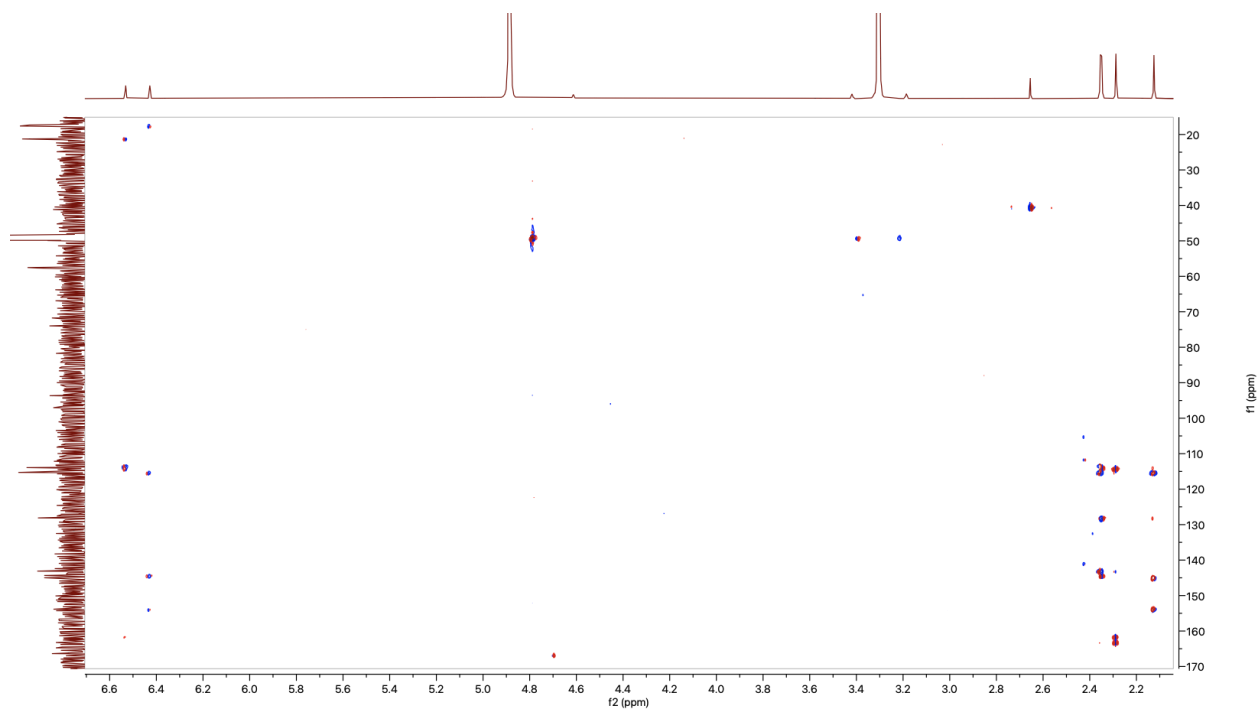

Figure S31. The  $^1\text{H}$ - $^{13}\text{C}$  HMBC NMR spectrum of 8 in  $\text{CD}_3\text{OD}$  (600 MHz)

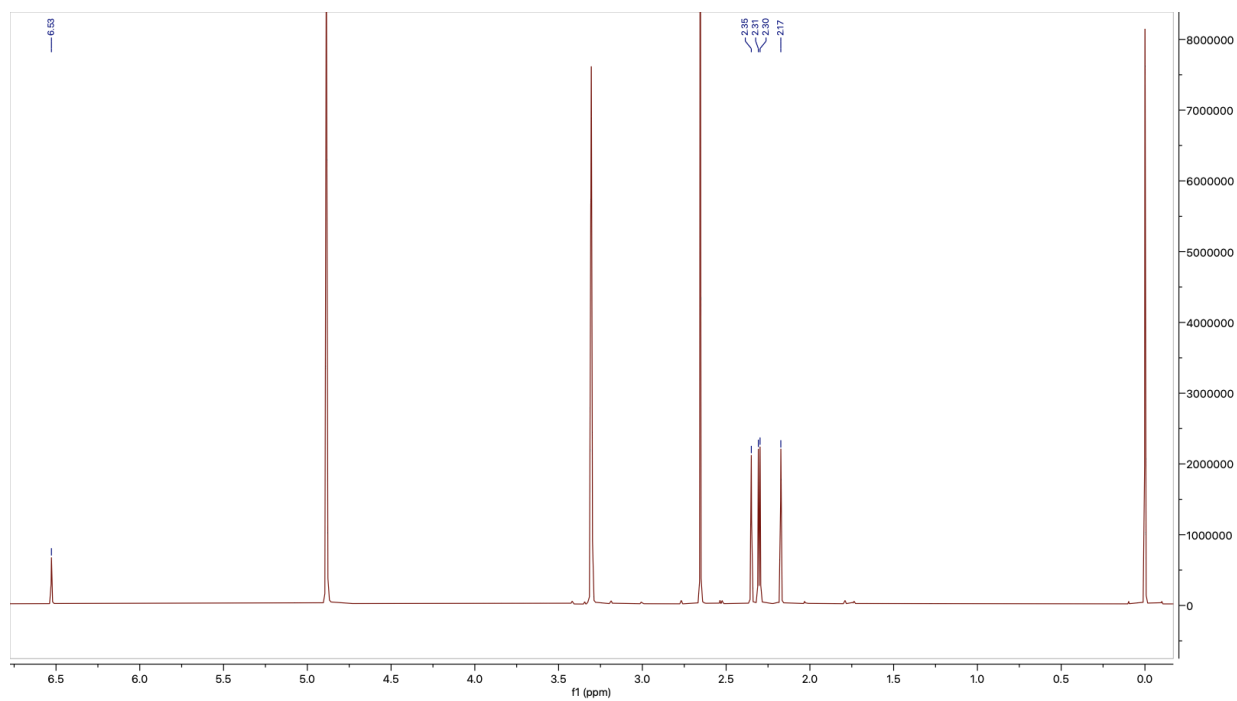

Figure S32. The  $^1\text{H}$  NMR spectrum of 10 in  $\text{CD}_3\text{OD}$  (600 MHz)

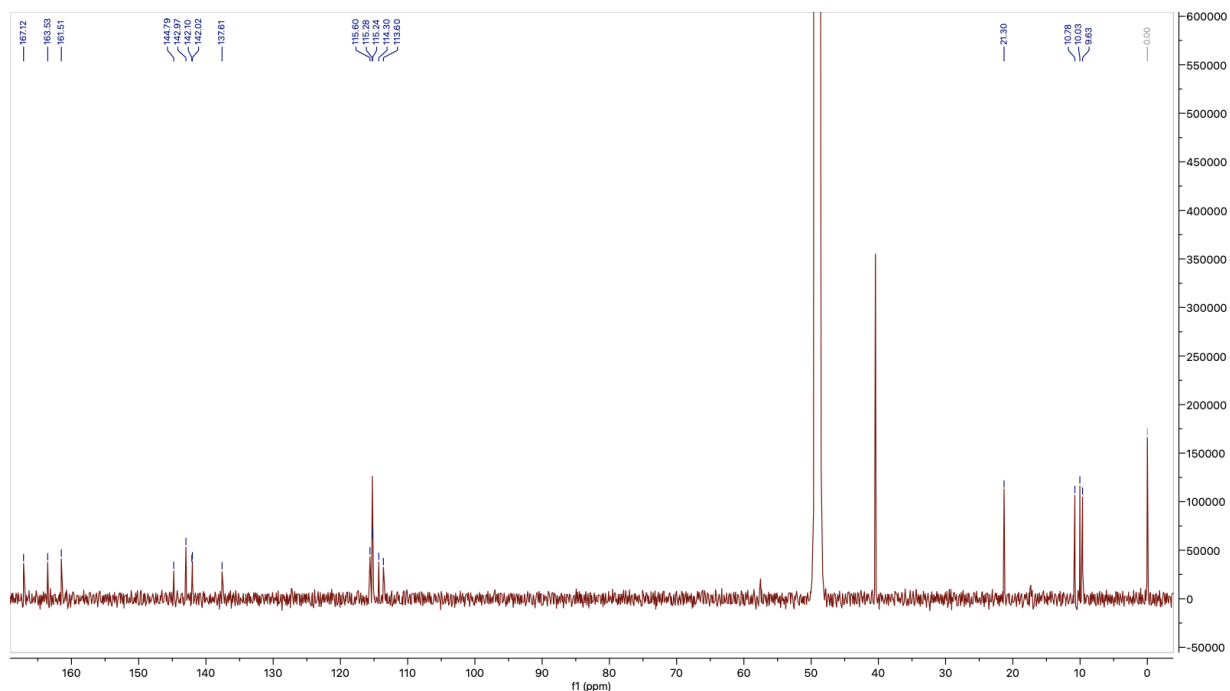

Figure S33. The  $^{13}\text{C}$  NMR spectrum of 10 in  $\text{CD}_3\text{OD}$  (150 MHz)

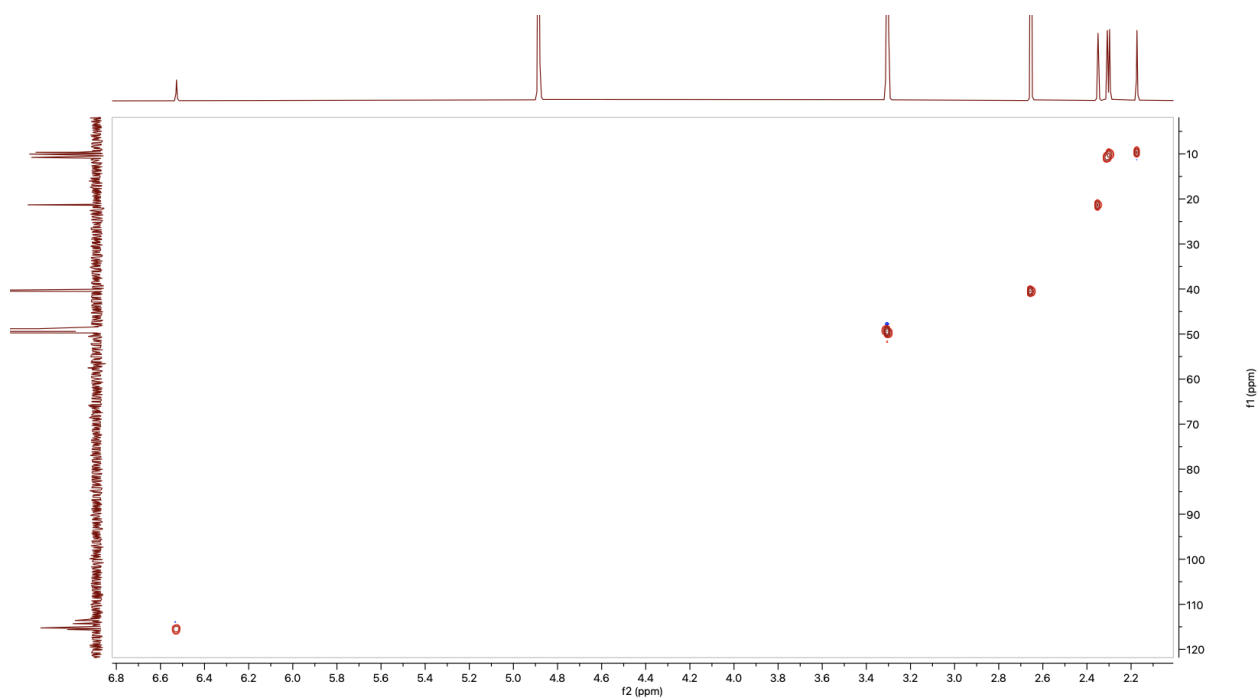

Figure S34. The  $^1\text{H}$ - $^{13}\text{C}$  HSQC NMR spectrum of 10 in  $\text{CD}_3\text{OD}$  (600 MHz)



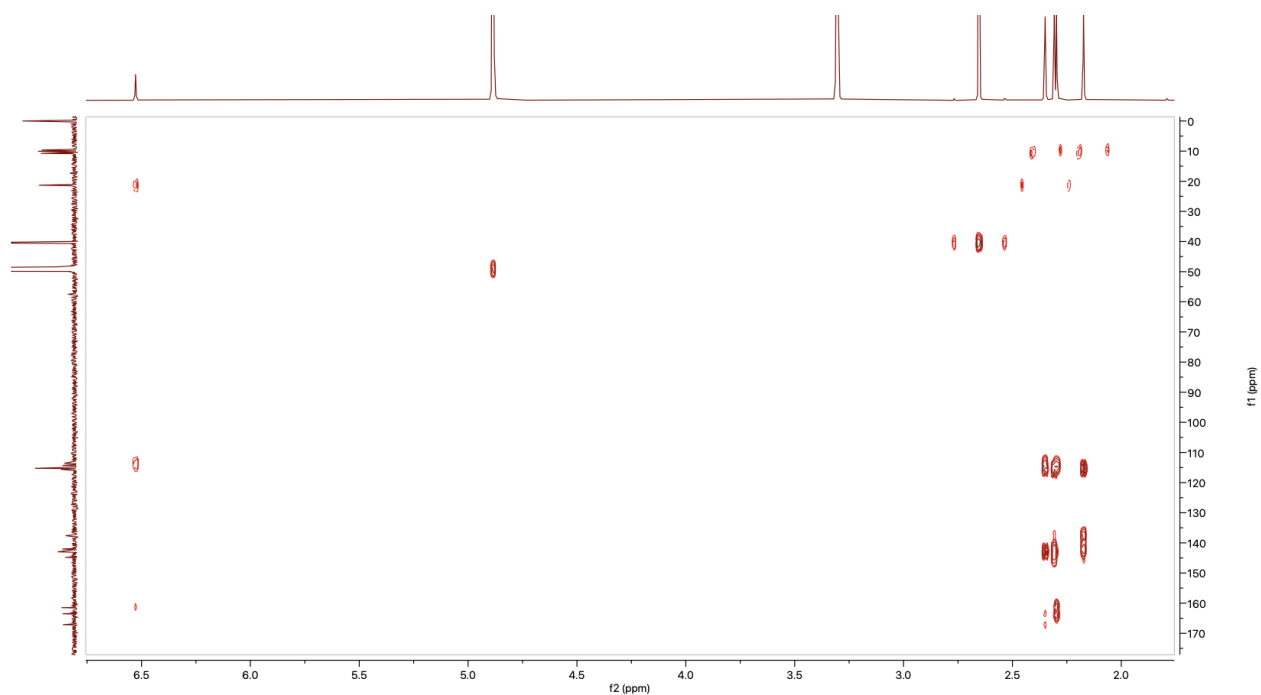

Figure S35. The  $^1\text{H}$ - $^{13}\text{C}$  HMBC NMR spectrum of 10 in  $\text{CD}_3\text{OD}$  (600 MHz)

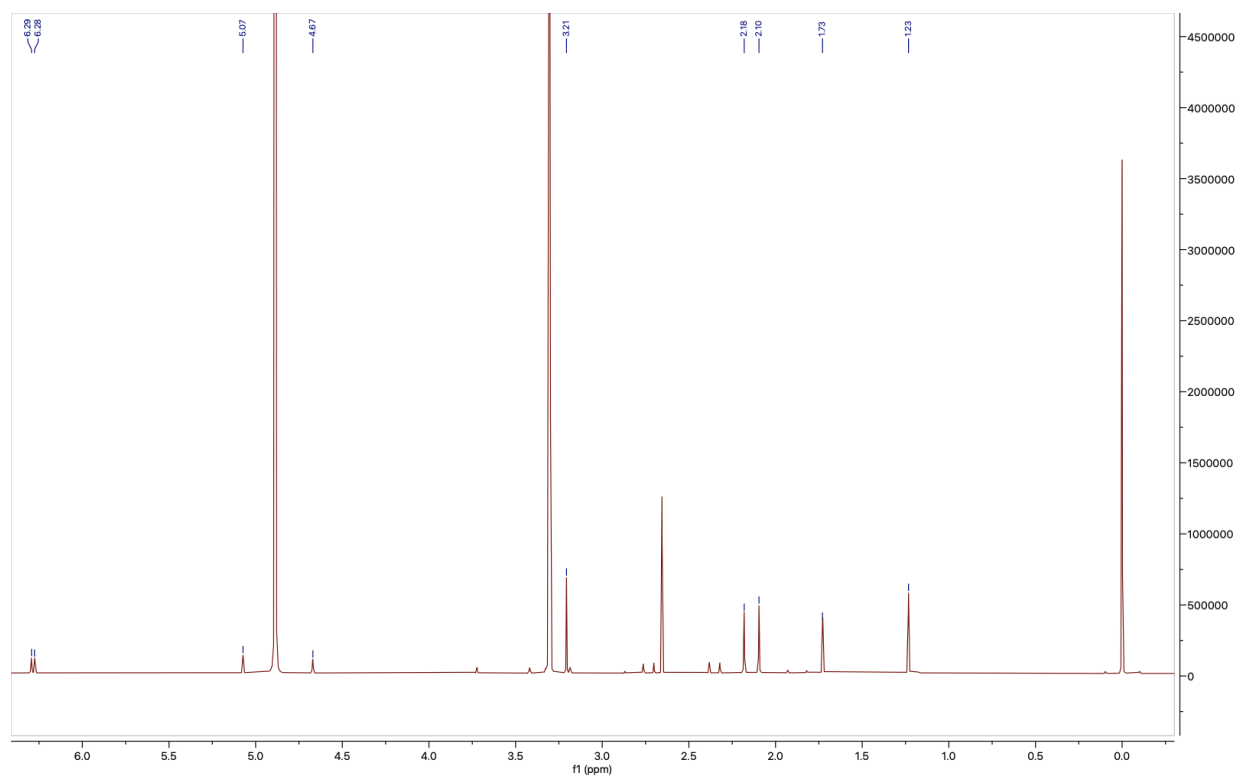

Figure S36. The  $^1\text{H}$  NMR spectrum of 11 in  $\text{CD}_3\text{OD}$  (600 MHz)

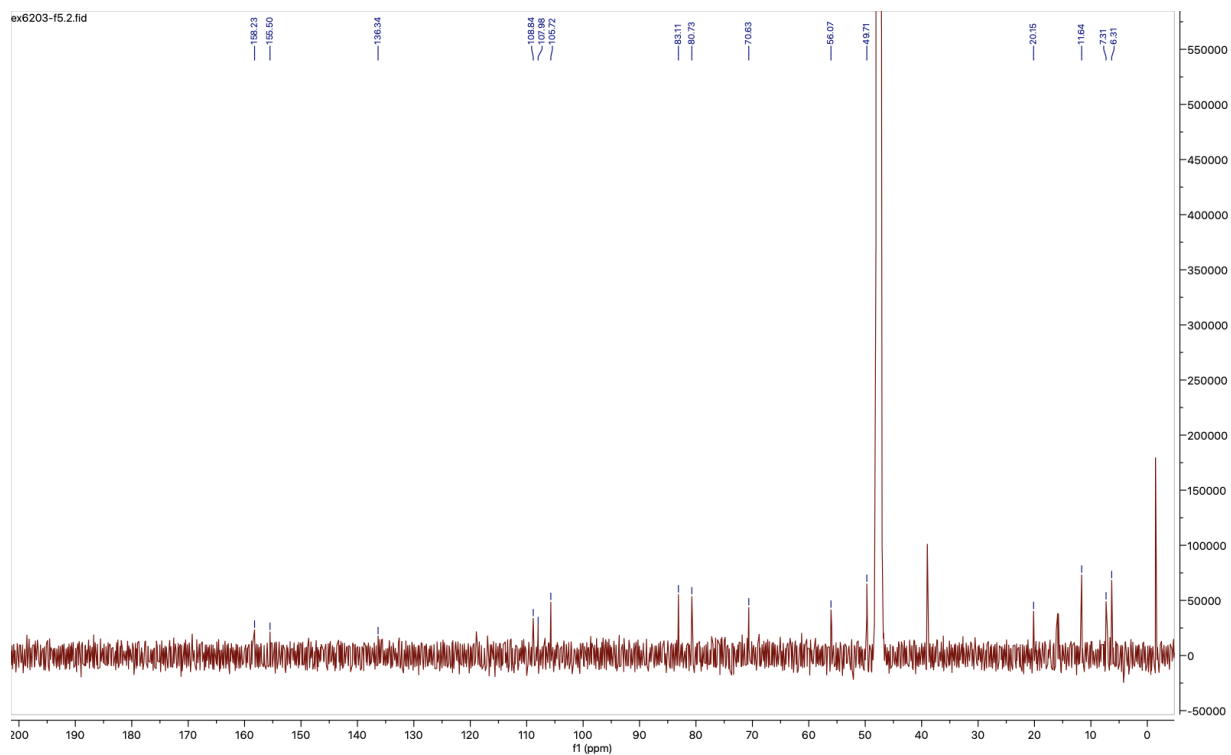

Figure S37. The  $^{13}\text{C}$  NMR spectrum of 11 in  $\text{CD}_3\text{OD}$  (150 MHz)

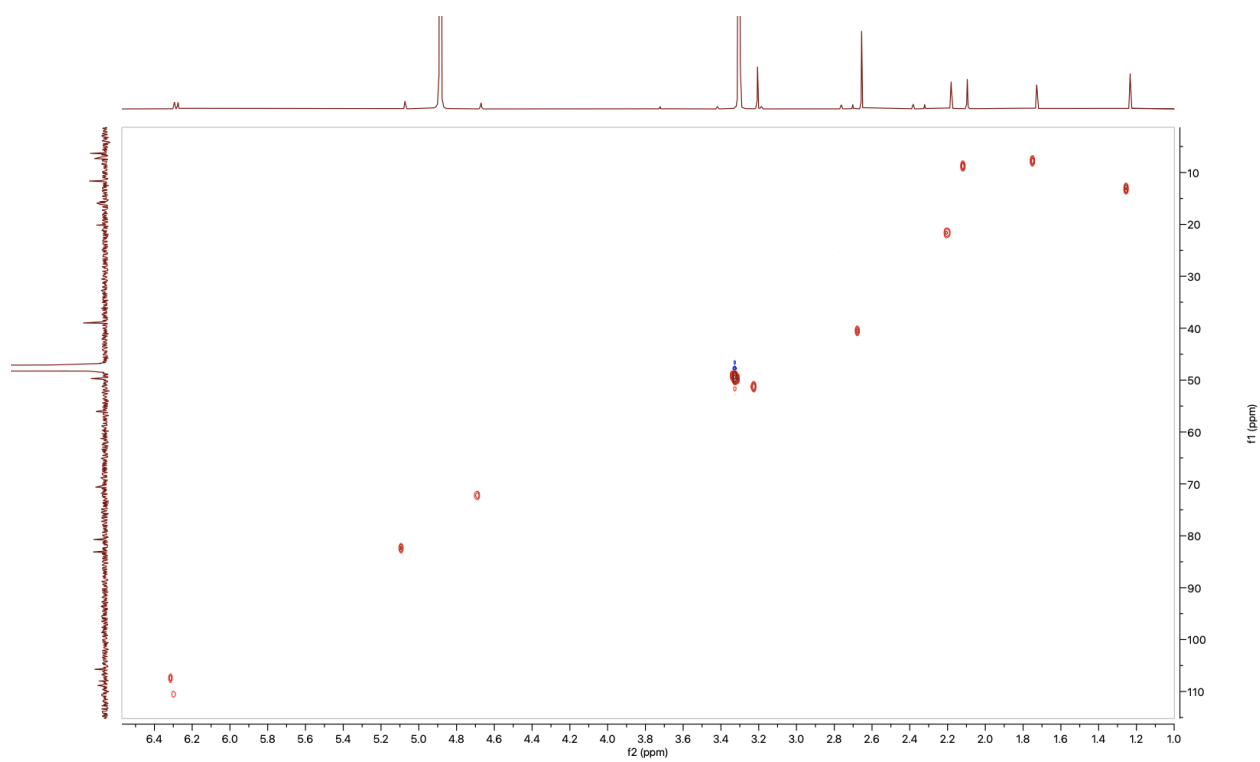

Figure S38. The  $^1\text{H}$ - $^{13}\text{C}$  HSQC NMR spectrum of 11 in  $\text{CD}_3\text{OD}$  (600 MHz)

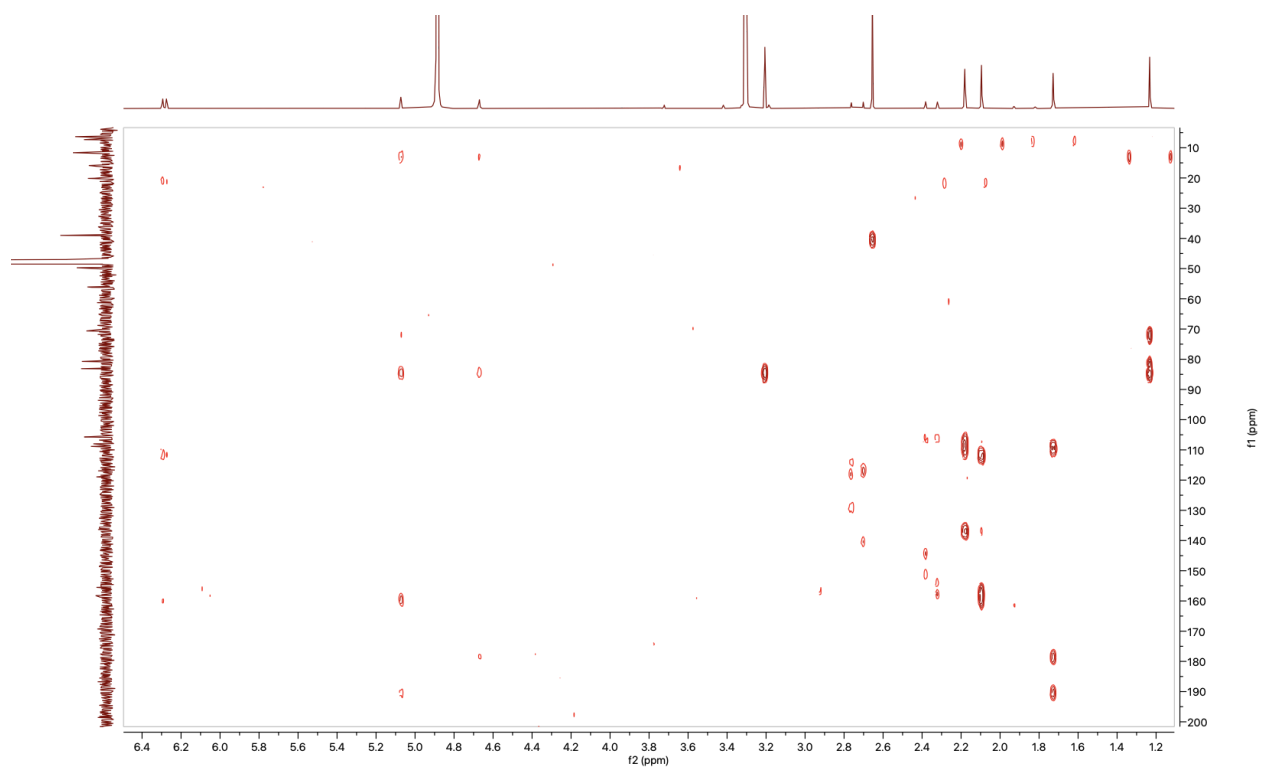

Figure S39. The  $^1\text{H}$ - $^{13}\text{C}$  HMBC NMR spectrum of 11 in  $\text{CD}_3\text{OD}$  (600 MHz)

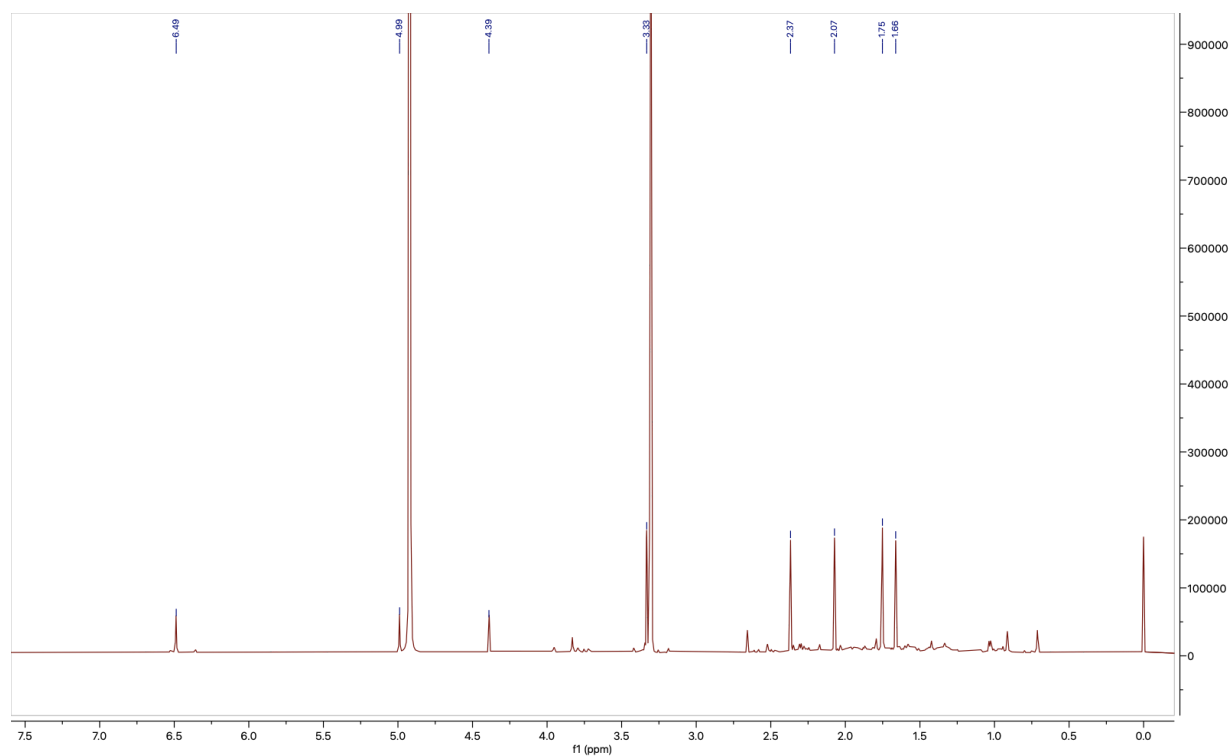

Figure S40. The  $^1\text{H}$  NMR spectrum of 12 in  $\text{CD}_3\text{OD}$  (600 MHz)

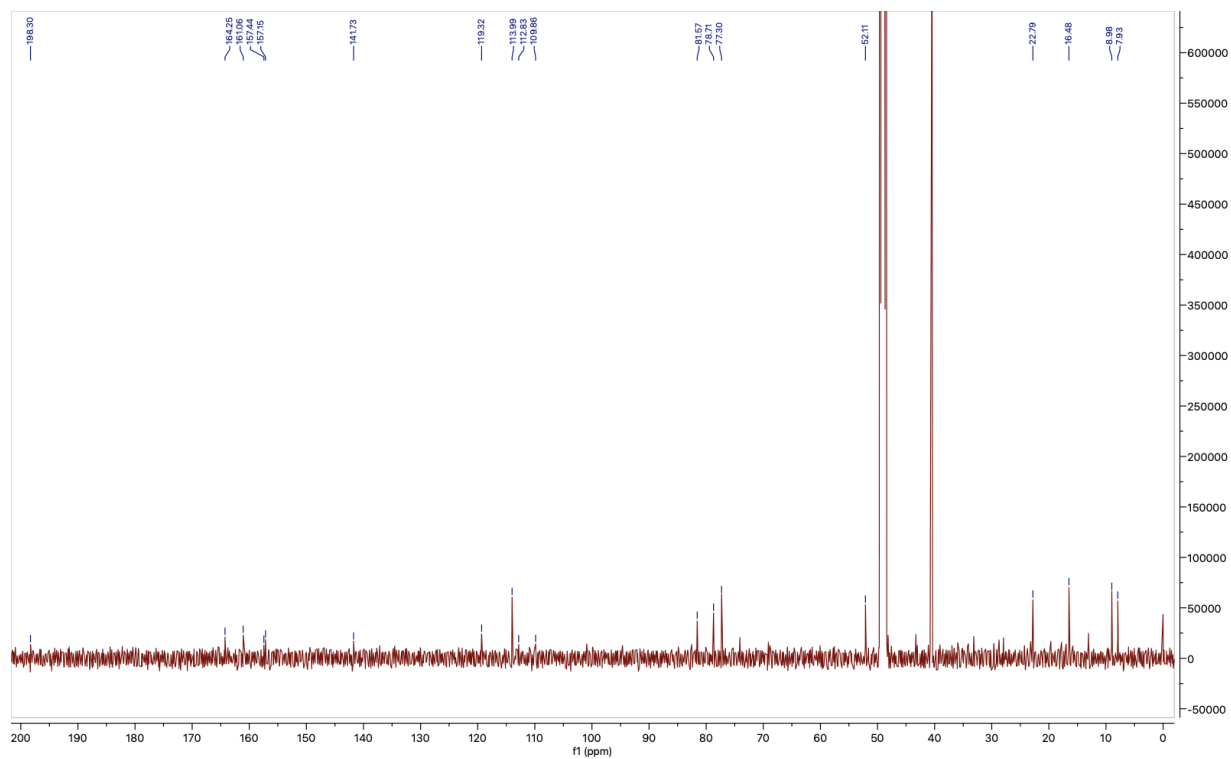

Figure S41. The  $^{13}\text{C}$  NMR spectrum of 12 in  $\text{CD}_3\text{OD}$  (150 MHz)

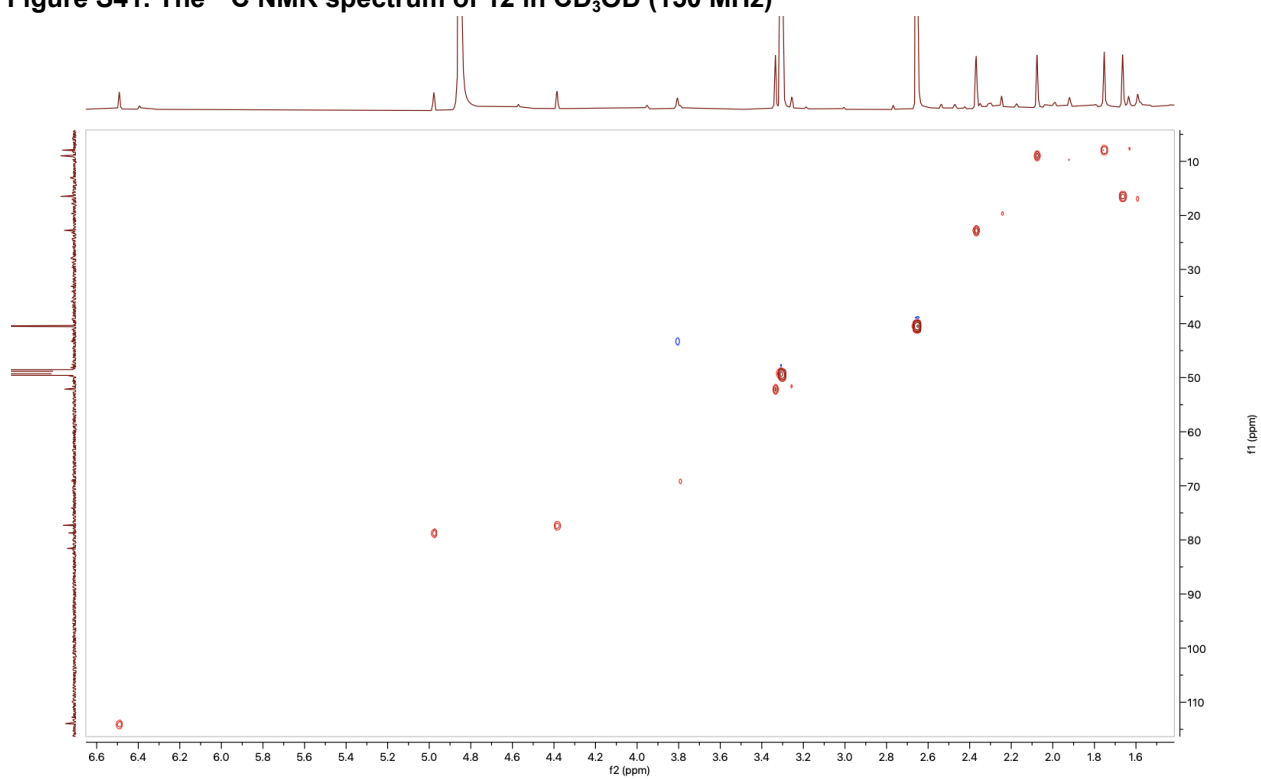

Figure S42 The  $^1\text{H}$ - $^{13}\text{C}$  HSQC NMR spectrum of 12 in  $\text{CD}_3\text{OD}$  (600 MHz)

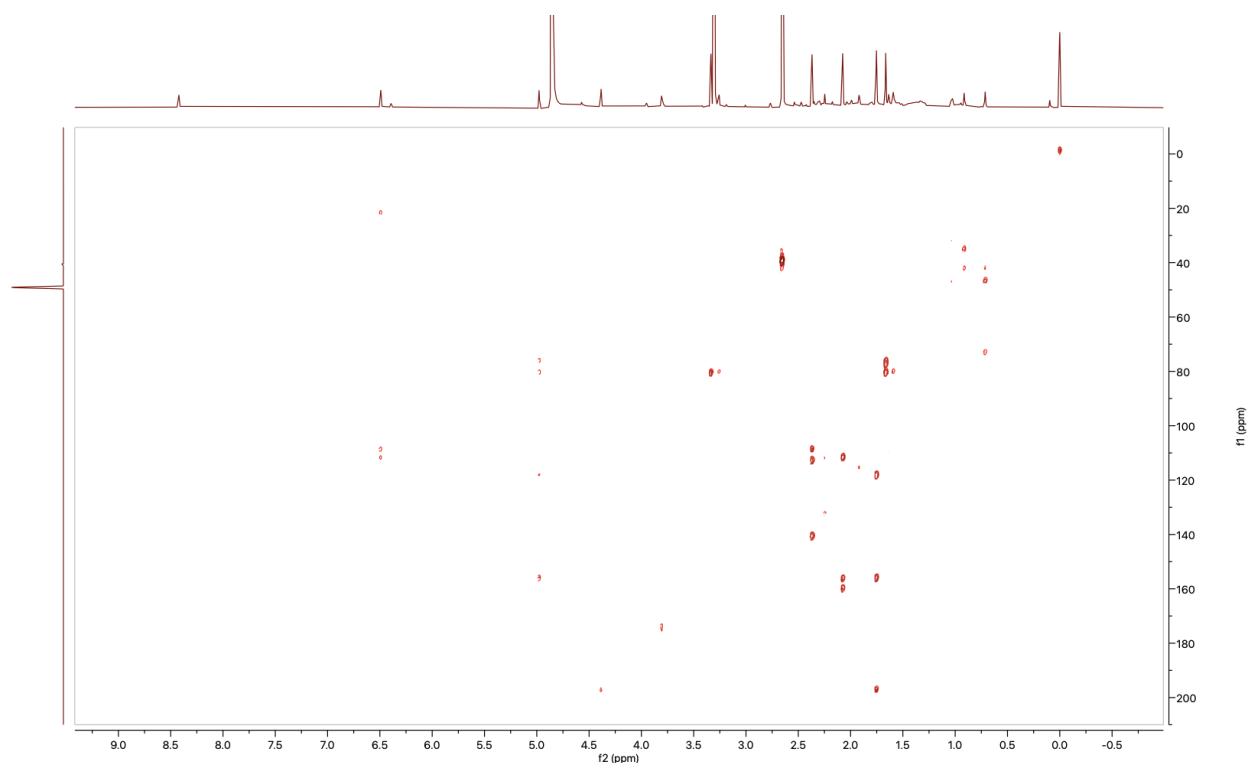

**Figure S43.** The  $^1\text{H}$ - $^{13}\text{C}$  HMBC NMR spectrum of **12** in  $\text{CD}_3\text{OD}$  (600 MHz)

### References

1. Shang, Z. *et al.* Roseopurpurins: Chemical Diversity Enhanced by Convergent Biosynthesis and Forward and Reverse Michael Additions. *Org Lett* **18**, 4340–4343 (2016).
2. Kim, W. *et al.* Linking a Gene Cluster to Atranorin, a Major Cortical Substance of Lichens, through Genetic Dereplication and Heterologous Expression. *Mbio* **12**, e01111-21 (2021).
3. Sala, T. & Sargent, M. V. Depsidone synthesis. Part 19. Some  $\beta$ -orcinol depsidones. *J Chem Soc Perkin Transactions 1* **0**, 877–882 (1981).
